# Supplementary material for: Identification and Validation of an Individualized Prognostic Signature of Bladder Cancer Based on Seven Immune Related Genes
Source: Front Genet. 2020 Feb 5;11:12. doi: 10.3389/fgene.2020.00012 (PMC7013035; doi:10.3389/fgene.2020.00012)
Supplement: Supplementary Table S1 — Differentially expressed genes between BLCA samples and non-tumor samples. [file Table_1.xls]

gene	conMean	treatMean	logFC	pValue	fdr
LINC00885	1.68167218421053	4.23190105065217	1.33140939299769	0.00137687777244118	0.00342094160958567
GSDMB	4.76226117368421	9.55889072548309	1.00519646481338	0.00761085179713401	0.0148783509345307
AC018755.3	0.156079471578947	0.472224321763285	1.59719155033437	7.95846351554494e-05	0.000291655921078391
SYNGR4	0.0273369857894737	0.359393211376812	3.71663707440742	2.41648737036815e-07	2.17878676262458e-06
MMP1	9.07346076473684	64.3170769868599	2.82547701389485	0.000611850197705348	0.00170278037074243
ARHGAP6	3.29428474736842	0.936691636690821	-1.81431917323122	1.438512965288e-09	4.66969182832158e-08
AC114956.1	0.168679018947368	0.514658921135266	1.60933609870698	0.000710785955949011	0.00194352621560351
AC099489.2	0.202422851052632	0.496026934468599	1.29304629991055	0.0172668342621932	0.0300898682327047
NAT9	5.01613426315789	10.914539236715	1.12160335812739	1.59716379151992e-09	4.94514591093866e-08
FAM111B	0.906279647368421	4.82207374758454	2.41162552415654	5.6728556391985e-09	1.21924158486004e-07
ISG15	37.9323032631579	217.561234509662	2.51992263686792	2.84817358610505e-08	3.97621138363758e-07
SFRP5	1.06123751947368	0.173088732301932	-2.61616387069643	3.84672365715465e-08	5.01571063093764e-07
ANO1	4.67924501052632	13.1160566642512	1.48698636269516	0.00541325984280131	0.0110689836999216
CLEC18B	0.0849648405263158	0.226054808359903	1.41173473993818	0.00396587213551147	0.00847609737767419
EPHX2	6.71830421052632	2.42655652415701	-1.46918665690777	1.42186354614264e-09	4.63167113129763e-08
AKR1E2	0.793656468421053	1.84415944992754	1.21637681781434	0.0182990381438822	0.0316446868842085
RPS2P32	0.853767368421053	2.14305074548309	1.32775108416873	0.00212659850343534	0.00494992776578058
AC013553.3	0.537454087894737	0.226830020410628	-1.24452992734681	2.7314657984702e-06	1.64264399925309e-05
MROH3P	0.205692695263158	0.730006305864734	1.82741836564623	0.0153762296333978	0.0272663042078339
RNU7-123P	0.154781289473684	0.671243962801932	2.11660612370451	0.000254096919570168	0.000795371549044032
AC091825.1	0.613402589473684	0.282185908405797	-1.1201883114617	2.05354442078795e-06	1.28994489344641e-05
SLC30A3	0.0309742386842105	0.235696044333333	2.92778681824912	0.00812932892384049	0.0157621782161847
AP001528.3	1.22643212105263	0.311332641611111	-1.97793863878833	7.72500502956981e-10	3.14412731821732e-08
GPER1	1.99973243684211	0.574571880149758	-1.79924768761191	1.76598091771364e-07	1.69315789264492e-06
PDE2A	5.76386984210526	1.07273843596618	-2.42573940836119	1.09404010082575e-11	3.59595885353336e-09
GPT	0.46102498	1.09769975603865	1.25156667255734	0.00513837973509508	0.0105737463226134
AL391825.1	0.113065649473684	0.407129261062802	1.84832622405681	1.13764845324345e-06	7.82756713457647e-06
ABHD12	21.1484855263158	45.2177302995169	1.09633422437809	8.66312731260382e-06	4.35080989738719e-05
RNU6-930P	0.0817455105263158	0.324242849033816	1.98786335221588	0.0181432318098726	0.0314302888420866
FOXN3	12.0989816842105	4.70311336111111	-1.3631976159752	1.91481279655674e-07	1.80178698604785e-06
AC136475.1	0.501547589473684	0.214285346603865	-1.22685339972462	2.59630465901289e-05	0.000111762508400025
MIR6832	0.0736839789473684	0.340642492512077	2.20883553684972	0.00310831686800277	0.00687022610370314
HDC	1.59433697631579	0.374909954855072	-2.08834054846243	1.57085226354903e-08	2.54304890981395e-07
FRGCA	0.0629133589473684	0.346928754468599	2.46320112547455	0.00206221696036463	0.00482340773215178
IL17RD	2.32735145789474	1.01886619400966	-1.19172449417319	0.00367141420114719	0.00792689110777262
SNORD116-24	0.900326089473684	0.407623522463768	-1.14321031983417	0.000889304743914687	0.00235778223965964
AC004801.2	0.367886544210526	0.805161916690821	1.13001802654479	9.61717140903109e-06	4.7661644782792e-05
TUBB3	0.284045996842105	1.64111391261353	2.53047890649836	2.94006902201964e-06	1.74903345149507e-05
MT1P1	0.182387303684211	0.517135395458937	1.50353674947485	8.26931113653e-05	0.000301924611901243
AC009237.3	0.209949726842105	0.499700498128019	1.25101974509311	0.00185067582655756	0.00439992955781731
LINC00896	0.0454796784736842	0.312098262654589	2.77870636628332	7.4334809838604e-07	5.52373876040288e-06
RTL5	3.72156118421053	1.04092613830918	-1.83804025273517	4.13693932428651e-09	9.64240901137737e-08
LRRC43	0.0971004078947368	0.334749844927536	1.78553412604902	2.17989271805239e-05	9.60127736082992e-05
PFDN6	7.74403589473684	18.4685539275362	1.25391336407393	4.63181955539515e-10	2.30522096333897e-08
AL080317.1	1.30008003157895	3.63167169927536	1.4820333530454	5.5599198109491e-08	6.67866679979757e-07
PRKAR2B	8.38015557894737	2.62974497565217	-1.67205412974031	1.9002350719279e-09	5.56226375266508e-08
SNORA71C	1.09635082105263	2.5073316147343	1.19344329695457	0.0148650661793035	0.0264900025379686
RF01241	0.10582931122807	0.354958437721417	1.74591084681965	0.00135359325734221	0.00337059990544285
FSD1	0.245010143210526	1.80846886185749	2.88385537602514	8.60499664935719e-05	0.000312293137585859
MEIG1	0.110766068947368	0.238032256454106	1.10364108343305	0.00367113716126509	0.00792689110777262
SNORD99	3.60802106842105	11.2091013077295	1.63539094627275	2.11784736922148e-08	3.17897361509621e-07
RIC3	1.05774013157895	0.3037809037657	-1.79988213851238	1.60518483163923e-08	2.57911980804363e-07
AMIGO2	12.1576820526316	31.3963368236715	1.36872804702161	0.00110895382827105	0.00284097496994125
MALL	5.96126048947368	2.32336976809903	-1.35939863650219	0.0259876707658083	0.0429231220579983
CCND2	18.6058382631579	6.58210299565217	-1.4991348839751	1.48737109648693e-08	2.44803016520915e-07
TOB2P1	0.180395991052632	0.511396325410628	1.50327451639002	0.000108535937892966	0.000381968677227949
AC083843.3	0.125825335263158	0.322611742884058	1.35837651081005	0.000951654055261981	0.00250049581423165
RN7SKP173	0.0921354131578947	0.272529542101449	1.56458494383446	0.018768531901814	0.0323403401665659
ABL1	33.63902	13.252491205314	-1.34387209320717	4.5814447790823e-06	2.54399669694943e-05
RNY4P10	1.20317615789474	2.75960455724638	1.19761366409341	5.01052044454515e-06	2.7473026713519e-05
CLK2	7.87797852631579	17.036587326087	1.11273898230893	3.04332610287597e-09	7.6956775833237e-08
AC015849.5	0.0320688173684211	0.342919360743961	3.41862630283484	5.52533448607382e-06	2.98594674185552e-05
ROS1	0.00452740036842105	0.39677597584058	6.45349797216929	0.00069952468350772	0.00191621631172869
AC009065.8	0.768665584210526	1.61903620954106	1.07470727106742	8.97061819868798e-06	4.47886400377814e-05
C1QTNF2	2.28313389473684	0.585437853913043	-1.96342753180727	2.19072885659946e-10	1.49471438314093e-08
AC126773.2	0.122302912631579	0.387114771603865	1.66230259741826	2.6505112908192e-05	0.000113698087219114
SRD5A1	1.33610988421053	3.47453633985507	1.37878180730658	2.31848873503892e-07	2.10764554920229e-06
AC023157.1	0.495978328947368	1.68623703451691	1.76545835969071	0.0167101916222567	0.029272087144842
SERPINF1	69.747977368421	33.7794920077295	-1.0460037482689	7.27083635228475e-06	3.76234700711304e-05
MIR99AHG	0.779377295263158	0.198751206024155	-1.97135828896956	1.24713281162357e-08	2.14072907235263e-07
LINC00337	0.0836536601578947	0.417344436811594	2.31873796993485	7.3750522767819e-08	8.36630698567846e-07
KNTC1	0.93399477368421	3.45531806425121	1.88733213549156	8.70108803077176e-11	8.37223152417285e-09
ACKR4	1.50943277894737	0.566153129355072	-1.41474228776095	7.11957988559818e-07	5.32439560345553e-06
E2F7	0.355615198421053	1.85151117630435	2.38031436903597	2.55807487421351e-08	3.65832003543202e-07
AC002401.4	0.569672586842105	3.03285103985507	2.41246975173574	0.016244202741228	0.0285838859639558
RUSC1-AS1	0.688618815789474	2.01573973120773	1.54953186590642	1.44118834800278e-07	1.44065087765456e-06
STK32C	2.14579601578947	5.43097062028986	1.3396971220249	1.64497962449956e-07	1.59672802351191e-06
RIPPLY3	0.664658354736842	3.06043281033816	2.20305082772382	7.43217540848446e-06	3.83631106435747e-05
SLC50A1	14.4266805789474	37.0462405652174	1.36058775625771	1.79021000949097e-08	2.79216212868488e-07
RCAN1	35.2885293157895	7.12892228164251	-2.3074434075056	5.18493022686344e-09	1.14050229597466e-07
GATA5	5.68436459473684	0.499710770350242	-3.50783387373441	7.56090845645539e-10	3.1386133931078e-08
AC139887.1	0.319782253684211	0.765464698333333	1.25924596643385	0.00158722786822867	0.00386172657173083
NR3C2	4.64515468947368	0.64422362607971	-2.85009316515724	1.86931027855588e-10	1.38086097466709e-08
PACSIN1	0.326366060263158	0.90584569710628	1.47277428557417	0.00222896638710383	0.00515621949466517
ADHFE1	2.21963439473684	1.01319675309179	-1.13140770492629	6.46389714660253e-07	4.92216323708211e-06
HIST1H2BL	0.105379488947368	1.22948325108696	3.54438608822768	1.98033315255243e-05	8.84900951210794e-05
LINC00853	0.284242077894737	0.928792260652174	1.70823581035449	5.82944125135639e-06	3.11987063889659e-05
ALOX12P2	0.297676096526316	0.89118938926087	1.58198867825498	0.00120020967935802	0.00303959076666444
ITGB4	43.8601973684211	91.6890028770531	1.06383640416262	0.000756646536536342	0.00205039846404266
LINC01719	0.129165359473684	0.297249461009662	1.20245498476906	0.00155709880203228	0.00379870713280589
LMO3	7.71268741578947	0.745218073178744	-3.37149907336005	8.67023231888659e-09	1.63661538228641e-07
AHSA2P	2.96544431578947	6.35922932463768	1.10060365425507	5.40214306914493e-05	0.00020834616733066
HIST1H2BE	0.0826613331578947	1.82261780876812	4.46265562738058	2.65140672593434e-09	6.94264713525242e-08
SELP	5.47921288421053	1.78082886391787	-1.62141977647541	5.80968033679524e-07	4.49884573500987e-06
DARS-AS1	0.0957765793684211	0.259062266449275	1.43555407979609	2.4250158426298e-06	1.48355305690456e-05
RNA5SP108	0.140172247368421	0.455343163236715	1.69975348372081	0.0010246749315211	0.00266398444507834
C6orf136	5.71392489473684	11.5758718574879	1.01856687836858	4.69729825849738e-08	5.8639658831794e-07
AC073352.1	0.0468351873684211	0.363375594710145	2.95579678560031	2.26087696167444e-09	6.30324434352118e-08
APOBEC3H	0.680041354210526	1.44067985342995	1.08305539041622	0.014912157578846	0.0265587862033116
MCAM	43.7821038947368	13.6044254613527	-1.68626525276381	6.23428191922747e-05	0.000235644302277327
SGCE	15.7473796842105	6.46179751838164	-1.28510433923439	1.68910109092071e-06	1.097769441252e-05
ACTN2	3.13604686210526	0.191337406144928	-4.0347562670256	3.25633717673271e-05	0.000135203926636503
BEND3	0.568472736842105	1.319538002657	1.21486983458717	7.0004608254685e-08	8.01401137695335e-07
METTL24	1.78451365631579	0.178550402753623	-3.32112764860863	6.49101831309587e-09	1.33542737509449e-07
MRM1	3.17782231578947	7.88674620289855	1.31139175686433	8.29352886101712e-09	1.59274802476217e-07
TCAP	0.477861565263158	1.77314911280193	1.89164922423583	0.00888710335699118	0.0170047644592316
AC245052.4	0.15068486	0.311007109495169	1.04541309013059	4.3838847372629e-05	0.00017478714263762
MNX1	0.0471240943684211	0.512017565485507	3.44165650674	3.75317218762362e-08	4.92452935359315e-07
ZNF516	4.37561952631579	2.13141247381643	-1.03767748434842	3.72006006555783e-08	4.88449874108198e-07
SCN11A	4.28142305842105	0.216946294326087	-4.30268055027608	1.92391168296273e-06	1.22314899703962e-05
SCD	21.8772341578947	90.9075010096618	2.05496898368056	4.04540904812791e-07	3.36453944902589e-06
PDLIM7	52.0122948947368	19.1043178188406	-1.44495395161311	0.000401953625684475	0.00118359320130537
LINC02321	0.0846580442105263	0.695708659661836	3.03876421372369	1.2127155198955e-07	1.24271880392131e-06
NSD2	2.48469126315789	5.44616319057971	1.13217361244244	8.98385107895363e-08	9.82880453611702e-07
IGSF10	1.91068979578947	0.184624513741304	-3.37142754659702	3.75444916028497e-10	2.03597484376956e-08
SH3D21	0.888207719473684	2.01400180797101	1.18109596342091	1.76679384983912e-05	8.03255464127245e-05
AL731563.1	0.0309430026315789	0.371526832101449	3.5857813034356	0.0248690049262794	0.0412706842297038
PANX2	1.62884522578947	4.61311893397343	1.50189296368144	0.00399131720666155	0.00852174382664891
TMEM233	0.560448226315789	0.254194134016908	-1.14065036639912	1.78634084848865e-06	1.14863308225471e-05
CA9	1.58874593421053	20.3985006192995	3.68250277325945	2.42954814966232e-05	0.000105571125363859
PIP5KL1	0.312124636842105	0.81880594236715	1.39139933497775	0.000462993302114321	0.00133572618683223
AC098613.1	0.294554706315789	0.849361715120773	1.52784347666428	0.0041107942093652	0.00873870823790475
BAIAP2L2	0.962756647368421	3.36610308118357	1.8058362731471	0.000369028618828561	0.00109923543023977
RANBP3L	4.64659551521053	0.25133138157971	-4.20851133967809	1.18128935209724e-06	8.0854415119959e-06
CXCR2	3.51655615273684	0.743643237789855	-2.24148069389502	0.000521567632904647	0.00148275426769723
HIST1H3A	0.119068474210526	1.11971653835749	3.2332701671456	0.000292636809262998	0.000898857358619828
NCKAP1L	5.38988091052632	2.17929026272947	-1.30639503313885	3.40738052218351e-05	0.000140295546933792
PDGFRA	10.1089803578947	2.74758595082126	-1.87940096935317	1.51650056572144e-07	1.4999525627112e-06
KCNMB3	0.115300922105263	0.296889463067633	1.36452184058933	6.09872457435076e-07	4.67444318580651e-06
YEATS4	6.05117236842105	16.4790167507246	1.44534357845004	3.80004339575973e-08	4.96865604422577e-07
AC096720.2	0.188243652105263	0.379221042028985	1.01043780240615	0.000251562792862813	0.000788518657281149
ARTN	0.846211756842105	2.3761362468599	1.48952692713482	0.00101057288509105	0.0026313320903363
GABRA3	0.645618700789474	1.94093561702174	1.58799799007011	0.00384695302668267	0.00825390276039416
AHNAK2	8.52201837368421	4.25573826176087	-1.00178573768739	0.00295298481711507	0.00656790589420698
E2F5	0.859353621052632	1.89175497391304	1.1384014156623	3.06273800545327e-05	0.000128244037483418
ENPP2	7.86668915789474	3.87913454328502	-1.0200217635488	5.57633053825709e-06	3.00743575422011e-05
AC104687.2	0.124310428421053	0.600314437270531	2.27177103511962	0.000227467762556147	0.000724368233000846
AL121652.1	0.0629942505263158	0.287250189589372	2.18901577984958	0.00114528884398525	0.00292089908654278
DUSP5P1	0.0405632615789474	0.481294228333333	3.56867355743863	1.67229170043787e-06	1.08982824588859e-05
STARD9	1.21471247894737	0.301920950797101	-2.00837209352823	3.17008703342567e-08	4.30393220030144e-07
AC006480.2	0.158997067894737	0.328312452077295	1.04606930814477	0.00162878681665847	0.00394997118275338
SPP1	6.17913142105263	145.402366249517	4.55650287958622	3.41614400885697e-08	4.571833811568e-07
PABPC1P1	0.0913095442105263	0.226028540845411	1.3076673824862	0.00845947263100391	0.0163112705298973
SPTBN2	3.14422918052632	6.44245625782609	1.03490445829242	0.000173752574625571	0.000572855307977436
AL133517.1	0.216130015263158	0.625450620652174	1.53299654629595	9.26707366850953e-08	1.00799339390991e-06
ZDHHC23	0.571022878947368	1.67670677024155	1.55400995044118	1.31464396622954e-07	1.33261289780469e-06
CDCA5	2.67447117894737	11.4028840084541	2.09207319395039	8.11119326413909e-09	1.56413483263147e-07
AC099487.1	0.0572980689473684	0.325139780289855	2.50450165469119	0.00231706394072547	0.0053389501068196
AC093157.2	0.156138695789474	0.379656597705314	1.2818669555141	2.6617752385805e-05	0.000114000396495866
FEN1	8.26330810526316	26.2980258502415	1.67016313669792	8.57452600636393e-09	1.62673237065123e-07
TUBG1	12.9883806842105	29.6817251594203	1.19235337146151	1.16595079435148e-09	4.04375873464267e-08
SPTB	0.09651673	0.220444929108696	1.19156734825439	0.0299954716657324	0.0485972744032585
PTP4A2P2	0.657279603684211	0.285509265507246	-1.20296965137753	0.000504867559049626	0.00144205054200763
LPCAT1	8.07784057894737	23.1929870113527	1.52164705682934	2.40278768610435e-06	1.4752455940568e-05
JAML	2.33083176842105	1.1632701236715	-1.00265873454322	0.00617703563480363	0.0124009971769549
ZNF91	1.48555395263158	3.00133788855072	1.01460474349433	0.0290156243005757	0.0472054243259951
LINGO1	0.431253016842105	1.14469551111111	1.4083574382813	0.000228669551378678	0.00072757788579246
AC023034.1	0.0118322063157895	0.293070486256039	4.63045666947813	0.000696079629725748	0.00190915686194185
CXCL5	0.332085606315789	4.83858063417874	3.86495680630123	0.00183708810170635	0.00437649468666302
KNOP1	1.32010751052632	3.19261136714976	1.27408151750156	3.73199121444828e-10	2.02966235236792e-08
LINC01764	0.11021199	1.64978195103865	3.90392226959956	0.00220722981717772	0.00511182179193377
AL445524.1	2.22389308421053	6.92334924154589	1.6383826945401	1.36268540979112e-08	2.29310012053012e-07
PRAME	0.0810553994736842	4.59024693921014	5.8235196639334	0.0283591638500477	0.0462939787122364
PNKP	6.30967757894737	13.3721014154589	1.08358801038304	2.64195127454304e-08	3.74120239730197e-07
YTHDF3-AS1	1.02586564736842	2.09736246570048	1.03173440863991	6.95777068722392e-06	3.62534438779179e-05
SPERT	0.404123019578947	0.89559129434058	1.14804597205422	0.00187392069099555	0.00444732697050453
AL161668.3	0.0641366721052632	0.389051847463768	2.60074102759446	3.00482788277723e-08	4.14877802747037e-07
SPRN	0.811797015789474	1.94473741763285	1.26038443103633	2.34684158240066e-08	3.43477290254162e-07
FASTKD3	1.63595504210526	3.67071128574879	1.16592654396756	1.37303432575563e-09	4.54360547692291e-08
FERMT1	5.99276221052632	14.6104200497101	1.28570462141397	3.27067945463646e-05	0.000135619356038329
RHBG	0.445375178210526	4.15563826495894	3.22197701696593	0.000872146293421507	0.00231824417560164
CD248	45.3201512631579	17.6375977374396	-1.36149859895662	3.27991238597584e-06	1.91180478714087e-05
SMPD5	0.0844715592105263	0.217487562603865	1.3643953141109	3.37948682474341e-05	0.000139396980308091
AC061975.1	0.0194409615789474	0.338460170219807	4.12181458467399	0.000392570985014583	0.00116070113328532
AC124067.2	0.472336874736842	2.11675806084541	2.16396830865546	0.0120567347563578	0.0221307487999943
MYCL	13.6269048405263	28.9104519707729	1.08513325182848	0.00874176445474931	0.0167677086960194
FAM136A	9.63602315789474	19.6757822753623	1.02991123008554	1.45535234726947e-09	4.69996146158641e-08
PLAG1	0.38947899	0.901881476777778	1.21139234437398	0.00541325984280131	0.0110689836999216
DDR2	11.3594034210526	2.09517435323672	-2.43874485846253	9.16455727811195e-09	1.7126951016854e-07
ASPSCR1	2.14726622105263	4.8779850852657	1.18378427739007	2.27240125415933e-07	2.07479633731346e-06
SNORD83A	0.614875752631579	1.46027423140097	1.247872503698	0.0057930624393218	0.01172295411443
AC008610.1	0.956963088947368	2.0251047063285	1.08146131859192	2.05578796899327e-05	9.12748453909624e-05
LYG1	0.457546873684211	1.15427217871981	1.3349919993605	2.47029079959702e-05	0.000107143010339433
TEDC2	0.844750553842105	3.83947616135266	2.18431219400779	1.93912348691651e-10	1.41022379786878e-08
DSTN	322.923452631579	100.366354806763	-1.68591649731134	8.7669768545525e-09	1.65321393690421e-07
AKR1B1	21.3936893157895	63.2044261753623	1.56284029820704	0.000678349506215761	0.00186379730343042
ACAN	0.173376433684211	0.53817692013285	1.6341727093958	0.00446595556620317	0.00935731147835512
U73166.1	0.168647273157895	0.348778163903382	1.0483007278035	0.0189564096358265	0.0326430980865778
ZBTB47	12.0562234736842	5.20681059202899	-1.21130623210765	1.00543537815085e-06	7.04443017186124e-06
SAPCD1	0.100111678421053	0.480676380507246	2.26345563397636	3.98610486857193e-08	5.17586751896298e-07
RGS1	24.7732296842105	12.3663928990097	-1.00235721685353	4.5643534905147e-05	0.000180600937457881
SGO1	0.504610553157895	2.7960527913285	2.47014931650589	4.01111101489588e-10	2.07329134910445e-08
TYMS	6.06693044210526	20.2015717608696	1.73542886867848	1.08181819059009e-07	1.14420263303505e-06
AC232271.1	0.379894017894737	0.832393057463768	1.13166793800244	4.82887834719545e-05	0.000189429739553477
AP002784.1	0.139807583684211	0.502992597222222	1.84709454737815	0.00404356468457368	0.00861858504789912
AP001205.1	0.0387798857894737	0.396017211956522	3.35218267532696	0.0218252679824604	0.036925834369243
PLOD1	17.5965718421053	38.2413446763285	1.11983886264201	1.50113990853997e-07	1.48711130432605e-06
OLFM1	3.48686273684211	0.83443338473913	-2.0630607876537	6.95151039275856e-11	7.4497911584367e-09
AJUBA	2.9281042	6.9054916147343	1.23777723175112	0.000547637392262926	0.00154702204020314
ZNF710-AS1	4.96772619473684	1.16319897396135	-2.09448775719573	1.116274974805e-06	7.7059114614666e-06
DUSP26	0.465249242631579	0.196680228490338	-1.24215186545493	6.32145344646636e-07	4.83331014735323e-06
DIRAS1	2.44867365263158	0.91266720589372	-1.4238397130478	3.31983404949239e-07	2.86020500317236e-06
MIR3176	0.559020710526316	1.30013169903382	1.21768413293526	0.00300540567346224	0.00667343817519692
PTGER3	1.62396561052632	0.451063586743961	-1.84811835135898	3.40133752595992e-06	1.96851786123485e-05
EPHA3	5.43045138947368	1.02708001811594	-2.40252353854255	1.96724600070261e-09	5.69620936900973e-08
PTTG1	7.67975020526316	22.7351588961353	1.56579379599468	9.363442123928e-08	1.01564374101875e-06
DLX3	0.609052775684211	2.71605249899275	2.15687221475089	0.0201313696554439	0.0343919344880287
AL604028.2	0.136655568421053	0.32816061	1.26385783089591	0.00184971717516653	0.00439992955781731
TMEM238	2.92735454052632	8.36927053647343	1.51550439794426	6.04029243130195e-06	3.20968583654824e-05
TSPAN10	0.304074988421053	0.718227275654589	1.24001328945657	0.000363792617270858	0.00108553449075272
AL355472.4	0.0692703863157895	0.442788326062802	2.67630656177173	0.000129131188933524	0.000443022215754198
SLC25A15	1.40619005789474	2.81914137560386	1.00346422923403	3.02171541125076e-06	1.7890958113379e-05
AC025176.1	0.103144695789474	0.4957201802657	2.26485635803964	4.64906841662603e-07	3.77621085286382e-06
NPTX1	0.763968068421053	0.283359408615942	-1.43087923295098	2.37213171991343e-08	3.46391166215901e-07
AL589843.1	1.40051948947368	0.572641989734299	-1.29025669307788	2.49384573785418e-07	2.23992472854753e-06
GJC2	2.35257741052632	0.714957999661836	-1.71831179687197	1.73222720675149e-09	5.19197748886233e-08
AC012640.1	0.0187895052631579	0.221029068309179	3.55623713048035	2.41293871751637e-06	1.48002514405883e-05
NUP62CL	0.525163881052632	1.45903277545894	1.47417269086844	0.000152919715831859	0.000512912807101449
MBOAT7	20.1026634736842	46.86428447343	1.22110219385067	5.58799785985717e-07	4.37777051542798e-06
NEXN	22.9352430526316	2.87015189173913	-2.99836720311996	1.71397724217155e-08	2.69115941379622e-07
KCNQ4	2.35719002105263	0.491833047620773	-2.26082748183051	5.88167953627944e-06	3.14231073858802e-05
SEMA3G	4.67633757894737	1.56342266966184	-1.58067121783056	2.56334362041572e-09	6.79322264828533e-08
ANTXR2	21.6256287368421	4.73699035338164	-2.19069943876215	9.07732768913853e-08	9.90796389943608e-07
PPP1R35	9.214743	20.9127822777778	1.18236917905169	1.9107673177961e-08	2.92667160684149e-07
AC009133.1	0.769598105263158	1.54058558816425	1.00130168206397	3.89623397302654e-06	2.21463308197204e-05
TMEM147-AS1	1.01325117894737	2.56555220144928	1.34027752642959	3.13396647952047e-06	1.84103359596877e-05
CNTNAP1	3.37945021052632	1.60996934178744	-1.06975534346227	1.87425263074665e-05	8.43526076054195e-05
HIST1H4D	0.139077917368421	3.93792630951691	4.82347084059568	1.05745907617621e-07	1.12605588230955e-06
CABP1	0.636419863157895	0.244084653154589	-1.38259727561872	3.96503893668159e-08	5.15208525587123e-07
CDK5	3.26242989473684	7.4901884057971	1.19905510780368	1.11260371327961e-09	3.9314093168108e-08
CPEB2	5.44081887894737	1.91621875323671	-1.50556153607621	9.26665894925028e-09	1.72148833529488e-07
AL355987.5	0.0298539768421053	0.253583803768116	3.08646757391675	1.49540870545922e-06	9.92265225133195e-06
AL353801.3	0.0591643442105263	0.257873006932367	2.12386087275471	1.93797635192341e-06	1.23094956977451e-05
AL158063.1	0.130666754736842	0.363188641304348	1.47482695715783	0.000106633849062909	0.000376580257851941
MT1A	16.4610765526316	3.48811413330918	-2.23853953904754	5.59334845725785e-07	4.38013343503877e-06
AL512363.1	0.391808331578947	1.55419551413043	1.98794802167073	0.00268080757066961	0.00605003517542385
ANO7	0.168992688421053	0.457957338695652	1.4382523807011	2.25257837809811e-06	1.39534922774034e-05
CCDC80	36.8499280526316	6.61459112270531	-2.47793791756775	3.84065796407755e-08	5.011284101529e-07
AL162595.1	0.224308818421053	0.509194728719807	1.18273114497166	0.00021716677842648	0.000695461518481788
TMPO-AS1	0.631878806315789	1.49895130096618	1.24623373003762	5.18493022686344e-09	1.14050229597466e-07
TMPO	6.81554852631579	15.648620384058	1.19913379443983	1.07073993223875e-07	1.13440391578745e-06
CNTD2	0.0886599489473684	0.626639386702899	2.82128101463187	8.47554275820764e-06	4.27375997775463e-05
CCL14	2.20280885263158	0.260473157992754	-3.08013769732809	6.83873762798668e-12	3.05512462175986e-09
SNORD88A	0.238488194736842	0.767870434057971	1.68694504559969	0.000817981282538093	0.00219724879087505
GFRA1	2.63525467368421	0.319515973620773	-3.04398242910571	1.93121062118877e-11	4.27715806792164e-09
AC138207.4	0.36364808	0.874502558550725	1.2659196459412	1.76679384983912e-05	8.03255464127245e-05
RPLP0P2	0.0843001268421053	1.02514704015459	3.60415224284291	5.12688179675825e-09	1.13171538691511e-07
MYC	95.1202915789474	35.7573109855072	-1.41151489016265	2.14372921265303e-05	9.46641356013387e-05
TINCR	1.98310144894737	6.99663326345411	1.81890239013393	0.000377014873555438	0.0011203563624518
RAB30	1.94193417894737	0.830928259661836	-1.22469847335529	3.27067945463646e-05	0.000135619356038329
AHCY	28.8211578947368	58.0666366666667	1.01058117555152	1.48960945253457e-09	4.73721053523833e-08
ADCY5	8.84148952631579	1.13642390993478	-2.95978835029538	3.79949505618481e-11	5.36014479242072e-09
FANCA	0.532123831052632	2.51999340652174	2.24358603809593	4.5928408414434e-11	5.93669507112787e-09
IGFBP3	92.7834505263158	268.108527207729	1.53087770032821	0.00352036769647459	0.00764498369085101
PLPP4	0.128944545263158	2.52033843044444	4.28879482222974	3.08756749498503e-05	0.000129158794392308
AL359265.3	0.112938184210526	0.266732055169082	1.23985787331052	0.00466977160694547	0.00973435447851548
VEGFD	4.98176756842105	0.473722267381643	-3.39454431941434	1.63363347898178e-10	1.27716104025563e-08
STK24-AS1	0.248150073684211	0.519816924492754	1.06679072363364	0.000232059487904374	0.000735992591539853
LIX1L	12.929705	6.26574023454106	-1.04513249473836	5.333522016458e-06	2.89646522705648e-05
SARS2	1.58562541052632	3.42166700217391	1.10964737526418	1.12725088753137e-07	1.17962121599281e-06
LINC01426	0.119774536526316	0.486047135937198	2.02077499956859	0.00516825333546898	0.0106236368884282
TBX1	1.38590231052632	8.67715510338164	2.64639654906061	0.00499117952823787	0.0103126859914467
BRCA2	0.319119140526316	1.24468017543478	1.96360803670204	8.86477053226298e-09	1.66663015527906e-07
HDAC10	1.49705390526316	3.05629234178744	1.02965637699499	1.24610818083316e-05	5.93720868384271e-05
HSF2BP	0.182753256315789	0.632523510338164	1.79122199200812	1.87650671441672e-07	1.78092541641886e-06
AC007906.2	9.18022087894737	4.04677899628019	-1.18175480341298	0.0168708809570635	0.0294958162824416
CKLF	4.58941773684211	10.4163059710145	1.18246069783165	1.80977672728226e-08	2.81565843565481e-07
ARNTL2	2.93134122105263	7.31219629879227	1.31874388676187	0.000425406963314823	0.00124193416098896
TCTEX1D2	2.24266237368421	4.57425328454106	1.0283238093346	0.000200183877555969	0.000649498546529941
HAUS8	1.22991250526316	2.52840214710145	1.03967025777329	1.0012980478834e-08	1.80995715534068e-07
AC015802.4	0.0784420389473684	0.267024520628019	1.7672732882532	1.91474331857849e-07	1.80178698604785e-06
KIF18B	0.74148289831579	6.16643520676328	3.05595139010127	1.55220675228909e-11	3.9336540027211e-09
SERPINB7	0.227546788526316	2.34335593550725	3.36434097361275	0.00428328646245492	0.00903355940713706
AL031777.1	0.130320009473684	2.59586079804348	4.31608250252305	2.47409214028219e-10	1.59526097175961e-08
ZCCHC24	23.1640837894737	4.37287530555556	-2.40523550544736	6.62260604683105e-10	2.89650250015597e-08
AC112777.1	0.135379304368421	0.705955249130435	2.38256952433253	1.55373532075098e-08	2.51979062356342e-07
AC067750.1	0.576928273157895	0.225966698577295	-1.35228179256968	0.00141316411248435	0.00349297829568487
MIR4713HG	0.313787595789474	0.714566901714976	1.18728076791372	0.00312569330232507	0.00690456597969452
MIR5587	0.204520973684211	0.988630114251208	2.27318205293956	0.00288860001128591	0.00644686594644434
SLC25A22	4.123879	8.95990804830918	1.11948192382999	1.59561237746749e-07	1.55686297651703e-06
SYNGR3	0.233403143157895	0.797735692229469	1.77308683887034	0.00502031086400328	0.0103637465883258
TEX30	2.42591821052632	5.76450528188406	1.24866588800246	1.21123828573183e-07	1.24188327623969e-06
GADD45B	119.862726842105	23.8596344516908	-2.32873925519028	5.21981824946338e-08	6.36797463034339e-07
SLC45A3	2.07151437894737	5.15389857995169	1.31497831317461	0.00050719509801476	0.00144759683967918
MT-TE	0.673718352631579	0.234623129468599	-1.52180035681258	0.000111707412698359	0.000391476687422359
KIF14	0.438002982105263	2.14264202248792	2.2903782374023	5.6728556391985e-09	1.21924158486004e-07
RHBDF2	3.03840895263158	7.83115707391304	1.3659094237381	8.70897901487577e-08	9.61780890265533e-07
AC024060.1	2.60280484210526	5.84631549251208	1.16746054256773	3.04941099920141e-06	1.80038069786079e-05
RNY1P13	0.120422157894737	0.448854463285024	1.89814686586585	0.00381820430058852	0.00820347730355461
GPR137C	0.144010613684211	0.400080325724638	1.47411454149387	0.00484780296195951	0.0100629856151395
SNORD42B	0.0821606315789474	0.335168319082126	2.02836661148022	0.00736969961054367	0.0144732754650022
JUNB	607.742867894737	205.73952384058	-1.5626420865841	1.01505682728022e-06	7.10123461978328e-06
AL512625.2	0.140561616315789	0.407632189613527	1.53606529565306	0.000165970044615373	0.000551055268094468
EN1	0.175458859736842	1.15864123747826	2.72322921524257	3.89730587610231e-05	0.000158040091102891
CCDC69	41.1025747368421	7.24029673888889	-2.50510803810883	6.28916325392986e-11	7.23948283027521e-09
TRPS1	2.51105110526316	1.11484893824155	-1.1714431522761	7.86860267007836e-06	4.01628378396845e-05
AC006277.1	0.160411486842105	0.530124623743961	1.72455409900402	1.91481081144158e-07	1.80178698604785e-06
DIXDC1	9.57311599473684	1.32843195862319	-2.84926425430477	3.61039802228394e-09	8.67373855212722e-08
TMEM108	1.55732857894737	0.359935500611111	-2.11326306098652	4.49069537265267e-05	0.000177974540924413
AL353807.3	0.130212369473684	0.272149951932367	1.06353527798064	1.26767939221137e-05	6.0262144504844e-05
PDE1C	1.80861719947368	0.168989764625604	-3.41987931542922	7.25642063488299e-09	1.44381994032142e-07
SLFN13	0.776914041578947	2.75956906828502	1.82861610310283	0.00703652069289103	0.0138741317529124
C4A	2.18282931894737	0.863630884939613	-1.33771258401914	0.000162412047917926	0.000540691493095111
GGT2	0.0152948221052632	0.270529034144928	4.14466820550269	0.000857572969894665	0.00228625200825996
PDE1A	3.27910951052632	0.524827847922705	-2.6433879053586	6.2408338641554e-10	2.78139586207002e-08
LATS2	9.48110894736842	3.63821086618358	-1.38182664998886	2.15085140418476e-06	1.34387029293102e-05
LBP	0.081991337	1.86675153102415	4.50891461782158	0.0127339323129398	0.0232012790821217
AL031667.3	0.292675052105263	0.593951479492754	1.02104530628268	0.00179273679562851	0.00428717645011984
KLRB1	5.17818881578947	1.29460249019324	-1.99993838811797	0.00104474202204563	0.00270491162683071
AL137802.2	0.0431882621052632	0.216533634492754	2.32587996952497	5.89826890718631e-07	4.56179800105263e-06
PI4KAP2	0.374232763157895	1.57296510231884	2.07147888996629	1.70494656595909e-06	1.10653450076411e-05
CCNO	2.65059122789474	6.12296791507246	1.20791692719472	0.000371672961553402	0.00110605864831506
FAM162B	3.11205701578947	1.02193947251208	-1.6065587413023	2.40941568339073e-05	0.000104866383167609
TNS1	114.683728894737	7.47103528550725	-3.94020873308774	6.70164943342567e-10	2.91747211877879e-08
LINC01389	0.207723449473684	0.722285104661836	1.79790433042351	2.03429960734753e-07	1.89711518840418e-06
AL110115.1	0.0623528368421053	0.224213876908213	1.84634846692556	6.20120786990414e-05	0.000234535906597483
CCNYL2	0.0167029391052632	0.611090169413044	5.19321138101059	0.000257147952079871	0.000802940094004763
RRM2	5.48455044315789	20.1898396410628	1.88018417606065	9.75853910915015e-08	1.04988227812491e-06
WNT2B	1.09593442105263	0.362137435990338	-1.59755224397112	5.21987297947103e-10	2.52423909056224e-08
AC097639.1	0.245514962631579	0.760517540990338	1.63117057280084	0.000848975408742178	0.00226558463863312
DACT3	9.89500631052632	1.32582851381643	-2.89980644184333	1.45535234726947e-09	4.69996146158641e-08
BEND3P1	0.236563312105263	0.500433727403382	1.08095267737316	0.00791160820101618	0.0153882018703626
Z84485.1	0.140090013684211	0.405248836014493	1.53245392500724	3.9138894238788e-05	0.000158438739196688
RNU5B-4P	0.571770721052632	0.228306768115942	-1.32446311640912	0.000417710864464204	0.00122384586975982
AP001062.2	0.0919236157894737	0.235139422705314	1.35500898457892	0.0174783397321316	0.0304132860161327
SYT7	1.21178734736842	4.52850189954106	1.90189731558192	0.000341078816655725	0.0010270681811766
PLK4	0.890641657894737	3.48087485748792	1.96653295050466	4.01111101489588e-10	2.07329134910445e-08
CTSV	0.675377750473684	4.59608249243961	2.76663813497127	1.78634084848865e-06	1.14863308225471e-05
CDIP1	9.35678468421053	4.39603049396135	-1.0898114610385	4.74717822560991e-08	5.91050464811671e-07
GATA3	42.1347607905263	86.2903184879227	1.03418776780345	0.00504959584438147	0.0104116007503439
ATP12A	0.0845065193684211	0.748225042562802	3.14633770324049	0.01438222124104	0.0257199406353063
AC025754.2	0.163245184210526	0.351686671449275	1.10725022699589	0.00126855848499367	0.00318719374048423
AFF3	2.48204840526316	0.220143135137681	-3.49501748976884	8.76640502903581e-12	3.18559161070735e-09
AC064807.4	0.349220178947368	0.713372516304348	1.03051871053821	0.000563059280914108	0.00158561616546144
LAIR2	0.178642201052632	0.467624596642512	1.38827788451082	0.0163806652044617	0.0287727411749967
UBASH3B	1.22319188947368	3.03058419543478	1.30894517806147	0.00083759490122554	0.00223903592131284
C3orf67	0.118777135263158	0.517531442536232	2.12338937357982	1.56922452242023e-05	7.24494214225826e-05
AC024937.1	0.172822498421053	0.410557730748792	1.24829405843165	0.000230653229571529	0.000732647121457694
COL10A1	0.0535561403157895	6.9371993358913	7.01715753759736	6.85575473726007e-08	7.88693773061063e-07
AC106875.1	0.00591406526315789	0.627643476835749	6.72965131692451	0.00236810135100607	0.00544384778840075
KRT18P10	0.092036395	0.380289250772947	2.04682077999172	5.98067406822924e-06	3.18857668301836e-05
AL158166.1	0.166637196842105	1.20211617164251	2.85079394289297	3.48472524732259e-07	2.97536470112135e-06
ZNF835	0.56501912	0.217482179528986	-1.37740249702608	8.87565191374129e-05	0.000320867809825008
TMEM88B	0.0502771431578947	0.424014234855072	3.07613811869962	0.00381248547580864	0.00819212837638542
PARP14	5.21512521052632	12.5697415497585	1.26918119027555	1.05443638860459e-06	7.32755183681034e-06
TMEM132A	2.4223968	12.7288123678744	2.39359070848353	3.19071086045997e-10	1.81416084469123e-08
CHRDL1	12.1723666842105	1.58732666939372	-2.9389387315523	7.06743498481977e-11	7.4497911584367e-09
PCAT7	0.759277532631579	1.79305139666667	1.23971761881588	0.00131549036822015	0.00328888968081491
CD1C	2.92315638421053	1.43536343192271	-1.02611094166597	2.17971577136816e-05	9.60127736082992e-05
TPBGL	0.190378721578947	0.685998472932367	1.84933312567586	0.0157025070755198	0.0277400303686026
LINC01977	0.0860655214736842	0.520095649009662	2.59526966529305	1.28599124030918e-06	8.70185431389438e-06
TUBA1A	91.4230821052631	40.2065344830918	-1.18512846523125	6.04028765555324e-06	3.20968583654824e-05
PRR9	0.188914779473684	6.63367858985507	5.13400163500641	0.00126578285203234	0.00318107201348551
CDC20	7.3976067	43.6279491618358	2.56012215239432	2.82726936333123e-10	1.71122758271561e-08
AC073343.1	1.27615363684211	0.557976353478261	-1.19352613803136	2.38795180997539e-07	2.15739955454203e-06
CAND2	2.04536801578947	0.967939169009662	-1.07937215748804	0.000140718055032892	0.00047753533488554
TMEM241	0.986373405263158	2.0471471384058	1.05340899235274	3.66722445461772e-05	0.000149713081901637
PRKAA2	1.83378817368421	0.364670358785024	-2.33016215446848	4.20770149356172e-07	3.47647076973975e-06
ZNF273	0.57733477368421	1.19326917439614	1.04743949032154	4.49133641356445e-05	0.000177974540924413
SAMD4A	4.87199464736842	1.21391633142512	-2.0048435602364	4.1258258736616e-07	3.42080737373012e-06
KLHL30	0.827252931578947	0.237536297386473	-1.80018051383186	4.26371063169175e-06	2.39666431658271e-05
TSLP	1.75923695263158	0.440058685120773	-1.99918197743905	3.34400853847909e-08	4.49453474964676e-07
AC078778.1	0.250521870526316	1.33741011458937	2.41643347219467	1.71582217835632e-10	1.29814601488209e-08
AC108463.1	0.248874173157895	0.890105896111111	1.83856046121854	2.53836279511508e-06	1.54231396130272e-05
TMEM56	3.17812594210526	1.5675461433599	-1.01966838482448	8.47188181490324e-05	0.000308057981575639
MSLN	0.744650733578947	8.94733438791546	3.5868221186196	0.00967292490829395	0.0182754093298076
IL33	15.5067365263158	6.18561890936957	-1.32590523752916	2.55807487421351e-08	3.65832003543202e-07
PRELP	42.8380561578947	3.96298036601932	-3.43423529226241	1.98707402883181e-10	1.42848544072687e-08
AC061975.6	0.181693803684211	0.730072841927536	2.00653119383053	0.0210465980893194	0.0357530973159478
AC011481.1	0.219061644210526	0.757854561618358	1.79058410710484	1.46746164601037e-06	9.78308426079186e-06
PHYHIP	5.76836621052632	1.02440910208696	-2.49337078168178	3.10104695392387e-11	4.93092745732827e-09
CALD1	155.852181684211	22.315832618599	-2.80403880993413	2.14372921265303e-05	9.46641356013387e-05
CLDN14	0.088647396	0.242210066330918	1.45010866719093	0.00352029951337051	0.00764498369085101
NRP2	8.30728415789474	3.16950727285024	-1.39011832546042	0.000582940033368159	0.00163200594540238
THAP5P1	0.0611968568421053	0.211072038816425	1.78620601325679	0.00301893631416199	0.00669791912766009
KRTAP4-1	0.119848893157895	0.713428158140097	2.57355157303628	7.57413833458382e-07	5.59722558376511e-06
HMGA2	0.0199754334842105	1.3656081137971	6.09517291386452	0.000246873096985468	0.000776543154859738
OR11H7	0.0969798763157895	0.23729920173913	1.29094992850369	0.0133389923298101	0.0241349578673314
EGR2	12.4521141578947	2.74566989780193	-2.18116061735852	1.20769607055325e-08	2.080808206776e-07
SPDL1	1.51450488947368	3.2265199763285	1.09113272187519	2.2496907166936e-07	2.05907058133278e-06
GYPC	16.5085885789474	4.44701229927536	-1.89230848070139	1.52465199574977e-09	4.78378685556069e-08
BMP5	5.98414080526316	0.616628270731884	-3.27867118213643	4.73498928011321e-09	1.06210065153916e-07
AOX1	6.04747871052632	0.606974840613527	-3.31662516290774	2.69544564554888e-11	4.81671372712599e-09
TMEM52B	0.0724968567368421	1.38614255450966	4.25701338017684	7.01922432899398e-06	3.65539163559895e-05
MAGEA6	1.32674806194737	9.07166217022464	2.77347247381762	0.00594318180033413	0.0119789365259071
KRT18	113.893852678947	349.598941596618	1.61801093617172	1.65117340668377e-05	7.57851434188052e-05
SYNGR2	34.9759104210526	71.3590687850241	1.02873517748023	9.22703241012238e-07	6.58777812447208e-06
RFX8	0.0813599273684211	0.284700997763285	1.80705725277204	0.00603707011181904	0.0121522812392133
SNORD124	0.166088621052632	0.532544509975845	1.68094887480083	0.000787786012384495	0.00212771397011232
LOXL2	4.48689934210526	9.3308604531401	1.05629130720326	0.0108654373559019	0.0202029730560685
MANF	22.7370486842105	48.6552136231884	1.09754940290647	3.72006006555783e-08	4.88449874108198e-07
RMI2	3.52464779	11.018552978744	1.64438376853343	1.53201318041655e-07	1.51131247655919e-06
LINC01082	18.0257223157895	1.18915997207729	-3.92204235921843	8.60102271945372e-13	1.81509137102606e-09
SLC8A2	1.02635670947368	0.296325914456522	-1.79227552134545	0.00206070103301347	0.00482061783719279
ADAMTS9	3.53460024210526	1.18635524978261	-1.57501097326956	2.72873145482037e-05	0.000116388243434405
SPRR2D	6.69553832684211	16.4850802049758	1.29988894697472	0.00284067789993597	0.00635957993515077
MLLT11	2.64661778947368	6.97142554492754	1.39730383080386	0.00150768553963356	0.00369593725896845
MIR621	4.95739358947368	12.1600049055556	1.29449010036082	7.47134595879294e-07	5.54311549958463e-06
BST2	88.1136842105263	193.945844541063	1.1382158704587	0.0171309929220191	0.0298753434516074
AC013472.3	0.471925515789474	0.235933092463768	-1.00018138820322	0.00227058401925279	0.00524408763580011
TSTA3	15.2163157368421	34.6605146666667	1.18767398954957	3.80004339575973e-08	4.96865604422577e-07
TDRD10	0.607983821052632	0.229783650108696	-1.40375678392554	5.00426666925691e-08	6.14912789803365e-07
EFR3B	0.457355735263158	0.198096421222222	-1.20711392567972	0.00113115602504716	0.00288799571342494
ATXN7L2	0.821164026315789	1.94133287222222	1.24130518001253	3.3201121872352e-07	2.86020500317236e-06
AC109347.2	0.390275221052632	1.07583831152174	1.46289749785021	3.19093627616762e-07	2.76671797037834e-06
BIRC5	4.55702509631579	19.4121526792271	2.09079589138879	8.67023231888659e-09	1.63661538228641e-07
CLPB	2.64511778947368	5.66690125797101	1.09922809637655	1.50113990853997e-07	1.48711130432605e-06
MFSD3	5.3916159	15.5112038864734	1.52452103668761	4.36209174615346e-08	5.55264093847201e-07
STON1	6.33359423157895	1.3204706447343	-2.26197221310517	1.60550654788411e-08	2.57911980804363e-07
MAP1B	23.3191796315789	3.12679874780193	-2.89875876520244	9.6862364704049e-09	1.76449373683696e-07
AC009275.1	0.486001331578947	1.45202486615942	1.57903398818842	2.8204493144114e-05	0.000119485415412737
FCRLB	0.942603951578947	8.23876611942029	3.1277046535168	1.0951317691704e-05	5.32192628462684e-05
HOXC6	0.123373149473684	1.17819436070048	3.25547720246599	3.86081917268835e-06	2.19671618452864e-05
PMP22	63.3313378947368	20.1471543507246	-1.65234347489511	5.80165039459967e-09	1.2341991650099e-07
DTNA	6.88062501052632	0.57517647721256	-3.58046303924983	5.92145292415738e-08	7.00531029104445e-07
RNU6-1223P	0.244007810526316	0.757882192512077	1.6350462807393	0.00213168386464127	0.00496114913821188
PLPP3	40.854928631579	9.29367881545894	-2.13618843976256	5.60703534233827e-10	2.6170349285645e-08
FAM72D	0.0907368148421053	0.656546954975845	2.85513827119055	8.80998211183985e-11	8.43375991655363e-09
ADGRE2	0.346866263157895	1.07260990933092	1.62867405348345	0.000233772087857541	0.000740798122693978
AC021491.4	0.100596541578947	0.487085694038647	2.27559490369019	0.00127307779206856	0.0031972159650221
PTGES3L	1.35413227684211	0.278487965797101	-2.28168178244008	2.19820073571779e-05	9.67053702327618e-05
AC074044.1	0.100328663157895	0.288312294130435	1.52289852498076	8.07206940051005e-06	4.10312124668912e-05
AC091182.2	0.149973157368421	0.855915875531401	2.51276470092758	0.00797426382622697	0.0154951441768327
MAP6	1.21264506842105	0.534194705961353	-1.18271976327279	1.02476686831882e-06	7.15848873799926e-06
AL354993.2	0.269161937894737	0.579675841884058	1.10677194891979	0.00450118701455038	0.00942166130678367
C19orf73	0.680052853157895	1.94242282850242	1.51413850128656	1.87650671441672e-07	1.78092541641886e-06
AC090164.2	0.0327012068421053	0.500972509082126	3.93731565289569	0.00206775526224659	0.00483455351844645
AL109615.3	0.0908147336842105	1.03382879776328	3.50892710685749	2.51200950009534e-07	2.25302646892152e-06
AC100778.2	0.133913065263158	0.278037272004831	1.05398157048776	0.0099247090345668	0.0186852614504893
KCNJ10	0.0740080927368421	0.225699160722222	1.60864611153416	0.00800188866071692	0.0155376045452518
CIDEC	1.79048107678947	0.505615225016908	-1.82423545968587	6.36350392824662e-07	4.85754370242845e-06
FLNC	150.662065684211	6.01582494112077	-4.64640981913916	6.16709851503343e-10	2.75507784375172e-08
AC073335.2	1.67945907894737	3.81937024782609	1.18533813702009	5.35914567864254e-05	0.000207113594991493
ZIC5	0.00923624310526316	0.325134016770531	5.13758454750742	0.000162499008607538	0.00054088502723137
BARX1	0.0580184638947368	3.05790675247101	5.71988850469504	1.25319430714943e-06	8.52562900110397e-06
ONECUT2	0.109024485684211	0.627138925045411	2.5241328824499	0.00204769808137407	0.00479632836212014
NAPSA	0.147207401578947	0.341772099770531	1.2151844169941	0.000106888675079853	0.00037719642458822
JPH2	18.4227804473684	2.02445561350242	-3.18588489860216	9.86455162964788e-07	6.94255747288384e-06
NR2C2AP	8.90731489473684	19.6156273816425	1.13894097621792	2.13268306373424e-09	6.0264355910912e-08
SNHG3	4.23800463157895	9.99392706521739	1.23766652506737	3.15942427137068e-07	2.74445729646889e-06
PPIAP65	0.100290712105263	0.228113597439614	1.18556444110631	0.00319840914329589	0.0070403273997725
AC244034.2	0.103796607368421	0.229507405289855	1.14478141498245	0.0107993975076716	0.0201020928012343
IGF2BP3	0.0352932058421053	0.890458036780193	4.65708523757924	0.000170977731002623	0.000565395693831903
PLA2G15	3.60437812631579	8.59537531400966	1.25381026721729	3.07826511607159e-09	7.74229066660204e-08
CREB3L4	3.68053478947368	8.23818507729469	1.16241112969885	1.81210846930721e-05	8.19884041707528e-05
CDKN2A	0.859437035263158	15.6964051272947	4.19089842542535	0.00233583357663941	0.00537757612251353
C6orf223	0.0568051048421053	0.902442708628019	3.98974285597472	5.62560868213576e-06	3.0264729010435e-05
REEP1	7.76837346842105	0.694969539915459	-3.48259090880226	7.50316597111396e-09	1.47880901131087e-07
AL159163.1	0.276128453684211	0.829291317753623	1.58653942990961	4.40159375930615e-05	0.000175418656979315
MIR25	2.16456481052632	7.7130595794686	1.8332262572325	2.17189581028513e-07	1.99761181805784e-06
ACTA1	2.10304682631579	0.579221968792271	-1.86029274612745	0.00129845093516509	0.00324881116102181
FIGNL1	1.33105212631579	3.45586756062802	1.37648085928957	5.11099904448937e-08	6.259639364997e-07
SELENOP	13.7630051052632	6.80801863574879	-1.01548862071636	1.89556622522699e-07	1.79176368181028e-06
AC018521.6	2.5035252	0.928892113961353	-1.43037802753763	1.00542614612071e-06	7.04443017186124e-06
MIR4326	0.352549178947368	0.791543933574879	1.16684490671877	0.00438912240749719	0.00922000713522949
RFWD3	3.52388652631579	7.82801522705314	1.15147909392938	1.52023388695273e-08	2.48684816224011e-07
AC023908.3	0.0641666318421053	0.239547461070048	1.9004163605228	7.22333557355651e-07	5.38464224738343e-06
AC253536.6	0.429024751052632	1.01159261951691	1.23749563000448	0.00128158568646945	0.00321389898893695
GRIN3B	0.0309717917368421	0.272902387468599	3.13935826467185	4.4525571826566e-09	1.01758015125683e-07
AC020904.2	0.106774526842105	0.262608154323672	1.29834420960536	0.00476356989064852	0.00990129369214387
RN7SL128P	0.0559300121052632	0.658448414323672	3.55737587029707	0.000289756177390625	0.000890677450258895
ZNF572	0.417299873684211	0.916911429765701	1.13569789767419	0.000139655420536255	0.000474444350329502
PALB2	2.1035767	4.59414269323671	1.12695124506594	6.2752215541289e-09	1.30534348137606e-07
AL645608.3	0.126382812631579	1.03439161379227	3.03291030046356	0.00585148124301421	0.0118207733163949
AL353572.1	0.073889407368421	0.299694589468599	2.02005357586461	0.0105296835044011	0.0196624653257442
USP21	5.62441589473684	12.7714747922705	1.18314994771201	1.23454010987425e-08	2.12121575838558e-07
AC131235.3	0.465405928421053	0.952906921086957	1.0338457119739	0.000175712614993378	0.00057850426304979
RAD18	1.25131431052632	2.93542095410628	1.23012319049776	7.33779160222321e-09	1.45692046383613e-07
AC013731.1	0.121416564210526	0.379547725048309	1.64431605008262	7.79893933644307e-06	3.98774257017229e-05
PDIA2	0.0624985398947368	0.519845531478261	3.05618860932232	0.000140131608431223	0.000475889478551138
GLA	8.44717931578947	17.0610447318841	1.01416441085516	1.37426364180236e-06	9.22881485724327e-06
CASQ2	45.9501398631579	2.12625093208937	-4.43368547936111	3.64616352201304e-09	8.74846114623154e-08
AC006111.2	0.227736966315789	0.505366825652174	1.14996247391356	0.00101057244905074	0.0026313320903363
AC020663.2	0.267107966842105	0.608859867342995	1.18868721477262	0.00220622135801284	0.00511179690545751
DHDH	0.652001908421053	1.88932995437198	1.53492658498846	0.00310052947820566	0.00685462879693328
AL031186.1	0.433298582631579	1.13618247698068	1.39076113547605	2.25398180499473e-05	9.88814089017489e-05
RDH5	0.563648495789474	0.250712583429952	-1.16876133731507	0.00186246824345063	0.00442403996099053
MIR6740	0.0500062684210526	0.229104046594203	2.19582208368305	0.00116289585577265	0.00295535892480865
DGCR6	0.256419357894737	0.619698625748792	1.27306158937192	0.0179324268037115	0.0311024333627324
AL121917.2	0.125615003684211	0.383460850048309	1.61007049871687	0.00177791570522582	0.00425823747474497
SLC6A11	0.516879235	1.66969486572222	1.69168532636596	0.0218492878716398	0.0369631402340256
KCNK13	0.169880684210526	1.13464257471498	2.73964417426185	0.000637685362461422	0.00176708206032178
MLXIP	14.5661986842105	6.72710884782609	-1.11456592191632	0.000115422959203174	0.000401870659404185
AC073365.1	0.169893821052632	1.01106422921739	2.57316936075618	0.0225364532194192	0.0379579418093324
AC024451.4	0.132769440526316	0.382452650144928	1.52635802433143	5.40138747422952e-05	0.00020834616733066
PELI2	5.28355352631579	1.29992794316425	-2.02307690548927	3.04016573971425e-10	1.76057499303267e-08
ESCO2	0.287197002631579	0.961184044251208	1.74277200742094	1.21123828573183e-07	1.24188327623969e-06
PIGU	9.57460557894737	20.4067694299517	1.09176284692722	1.55380149840797e-08	2.51979062356342e-07
ITPRIP	13.6093605789474	6.540386952657	-1.05715138661823	3.21747148171131e-05	0.000133797467666998
RCC1	8.41966994736842	25.4651859444444	1.59669066610215	1.95713555681333e-11	4.27715806792164e-09
LINC01224	0.226898232736842	0.989482788142512	2.12462923989372	0.00206710544072818	0.00483363651350733
MCM8	1.20660227894737	2.86901652487923	1.24960606538133	2.36547870283346e-07	2.14205969600696e-06
AC112694.2	0.116081596842105	0.265034272995169	1.19103966366784	0.0028681914915207	0.00640741480597725
STAC3	1.28182693684211	2.73437703985507	1.09301069540923	4.74867879262292e-06	2.62520507324643e-05
HID1	6.56474224736842	15.3487343234058	1.22530942143767	0.00580040647471077	0.0117276968410558
MEOX2	2.20927385789474	0.621995827065217	-1.82859545730232	4.48601486732078e-08	5.6740254805965e-07
ACBD7	0.286245499473684	0.694284415676328	1.27827377774875	0.0261118244236815	0.0430890692513851
NUF2	1.12983824368421	7.56707052584541	2.74361865112516	1.49918299128758e-10	1.20726053500124e-08
AC087289.2	0.226482319473684	0.497788305507246	1.13613390811469	5.93410229135142e-06	3.16761198556548e-05
ZGRF1	0.288867621052632	0.887028236231884	1.61857152729575	1.08683020749356e-09	3.86948675203068e-08
IRF7	7.37709205263158	17.0420992205314	1.20797891246862	9.01629844631342e-05	0.000325144739089331
MTCP1	0.378824157894737	0.923000027777778	1.28480235582698	2.58623303666983e-06	1.56736080319884e-05
DNMT3B	0.891540126842105	4.47505576859903	2.32753402360439	1.55380149840797e-08	2.51979062356342e-07
NPIPB14P	0.102753443578947	0.259596442243961	1.33708386761512	0.00037431253623952	0.00111327433733035
TMEM92	0.873525931684211	2.10251756407246	1.26719541550382	0.0187665172467987	0.0323398386390231
LMNB2	10.8851016842105	26.9575266835749	1.30833325262115	2.15257973855322e-08	3.2131148476113e-07
TFF2	0.994887068421053	6.64648587449275	2.7399870845228	0.0269666738978508	0.044330981974475
AC016582.3	1.05269061052632	0.490789771618357	-1.10090439779993	3.44496402377297e-05	0.000141687549272364
ZWILCH	2.07523827368421	5.16792221352657	1.31630736243702	8.69291814122158e-10	3.33548513463682e-08
AL356274.1	0.0438326889473684	0.268710761183575	2.61597500894086	0.00073984440704733	0.00201096633484413
HIST2H2AC	1.43559171052632	6.26176981280193	2.12492497713516	1.80210447705844e-07	1.7242675320269e-06
AL359513.1	0.731027741052632	1.6086932923913	1.13789123354865	0.000203930312746362	0.000659828325238833
AC024940.5	0.106434152631579	0.341131736835749	1.6803678231612	7.75966034062943e-07	5.70651287408632e-06
ERVMER34-1	0.462588493684211	2.28431462845411	2.30396008668314	5.88167953627944e-06	3.14231073858802e-05
AP000864.1	0.0774130884210526	0.274940882149758	1.82847203127152	0.000399322703393524	0.00117695442723416
AC034231.1	0.483842555263158	1.24444087770531	1.36288812182385	3.06269661081397e-05	0.000128244037483418
PRR15L	4.01367887157895	11.559819571529	1.52612178151366	0.00954215162679334	0.0180665429688681
AC106795.1	1.79166250842105	3.67818432857488	1.03769487514546	4.3486126552955e-05	0.000173565239845372
RUNX2	1.20226696421053	2.52578762458937	1.07097605526816	0.00596895529449524	0.0120244302031245
B3GNT4	0.111738547368421	0.563510509227053	2.33431554618872	4.36209174615346e-08	5.55264093847201e-07
SLC6A6	4.0175672631579	9.0910271173913	1.17812112332127	1.78177739674801e-05	8.08304866904809e-05
UCA1	13.4559403857895	58.7223678591522	2.12566692396558	0.0201312039176225	0.0343919344880287
AC116407.2	0.304863464736842	0.86463708647343	1.50393145228408	6.48613777105909e-05	0.000244229185226534
AL122125.1	0.280380007368421	0.685025500362319	1.28877421305165	0.001413143914444	0.00349297829568487
JARID2-AS1	0.154861931578947	0.434216087391304	1.48743063576537	0.000173659342679009	0.000572855307977436
SRCIN1	0.70605706	1.93258515351208	1.45267529882092	0.00331438505970712	0.00725560691579567
TMPRSS3	0.272464315105263	1.6000223085	2.55395282388243	0.0139007910507174	0.024985203801572
NANOGNBP3	0.0524974942105263	0.215067357536232	2.03446810481742	2.40756693136047e-06	1.47721315674024e-05
LINC00543	0.0746982286315789	0.331924909497585	2.15171096441343	0.0106479942311397	0.0198537529324132
CHAF1B	1.13173556315789	4.17156323888889	1.88205121298764	1.57872690062105e-09	4.91639303141802e-08
BCHE	6.9981200631579	0.874668792688406	-3.00015869043016	9.46879237376542e-09	1.7427865688918e-07
RFC5	3.54532568421053	8.65341218599034	1.28735096003177	6.94434213220489e-10	2.97481030654247e-08
PPIAP3	0.127581894736842	0.373192576570048	1.54849667937874	1.84219670670398e-05	8.31423781925938e-05
ARHGAP24	2.5567198	0.804686790966184	-1.66779480318968	6.71895690671301e-07	5.07110975223879e-06
PDCD5	16.2960213684211	33.8356873937198	1.05402592094667	3.2962483644756e-09	8.13783000824417e-08
MRVI1	20.5796397368421	3.02135762971014	-2.76794885982451	4.31057316080836e-10	2.18592660043912e-08
AC233992.3	0.19412311	0.438254876256039	1.17479826479109	0.000283619255336224	0.000873960927553551
AL161431.1	0.0659408823157895	5.47398405384541	6.37527423081426	2.21877968734697e-05	9.74964011093471e-05
SLC16A8	0.318205787894737	0.663186731217391	1.05945506492735	0.0284003710721854	0.0463572129123458
ESM1	0.259480276315789	5.96557514157005	4.52296444962664	5.6862302174418e-12	2.73565993768873e-09
TRIB1	86.864398	27.1253865386473	-1.67912130300479	0.000278611400374612	0.000861074897912839
SLC4A11	2.91458116789474	6.48698003538647	1.15425841904038	0.00177003623567021	0.00423990679048642
KCNN3	0.87431607368421	0.290738862342995	-1.5884309963445	1.19887969428993e-07	1.23325546622598e-06
RNU6-483P	0.0762831421052632	0.208674117342995	1.45181549390858	0.0287278772959549	0.0468110445537781
AC006206.2	0.339869967368421	0.691281737408213	1.0242909287107	0.00832850017922562	0.0160851928834596
PPP1R12B	35.8954786842105	3.02044664492754	-3.57096832954969	2.27224133198862e-10	1.52495111042343e-08
CDCA4	4.64705289473684	14.709673	1.66237720402453	5.28253712986345e-10	2.53494230607744e-08
LARGE1	4.79630485263158	2.30466479835749	-1.0573664258729	3.69723039883937e-05	0.000150806812985702
AC009704.2	0.154167731578947	0.421835472222222	1.45217958637742	7.89110214421975e-05	0.00028972156150889
AC018766.1	0.182072210526316	0.392030249613527	1.10645423682398	0.0122682066013838	0.0224574010206599
LINC01980	1.31319986105263	5.55035531702899	2.07949362903549	0.00172409315061674	0.00415371298467259
LKAAEAR1	0.0475242994736842	0.233228086111111	2.29500426692504	0.000653616135253897	0.00180589008183903
NRIR	0.0604763715789474	0.489647051062802	3.01729870643188	1.41070171496e-06	9.45997007783934e-06
FAM53A	0.224381813684211	0.48339857413285	1.10725746847248	0.00339542367599309	0.00740536259823996
AL021807.1	0.311171845789474	2.74575000019324	3.14141683530529	4.3285154018109e-09	9.92861134296329e-08
IMPDH1P5	0.115259882105263	0.251691724951691	1.12676733560228	0.0191459677600969	0.0329488001917383
CDCA8	2.48183072105263	14.1132180910628	2.50757036664771	1.1290286299874e-10	1.0135868030839e-08
FBXO43	0.123695741894737	0.327759383690821	1.40584124733228	7.39979696698211e-06	3.82064916047015e-05
CACNA1C	3.47716678421053	0.560482552487923	-2.63317089984042	9.95691201496551e-06	4.91247804724685e-05
SPARCL1	255.43861	35.4281904263285	-2.85000692385218	1.43643074360122e-11	3.8502500060271e-09
MYH16	0.0162197205263158	0.252218283495169	3.95885199497375	8.79949342017215e-08	9.69515574498812e-07
CDT1	2.47528794894737	11.6830553891304	2.23874935365123	7.4557208870966e-10	3.11562786201767e-08
AL513123.1	0.0324948994736842	0.427747885628019	3.71847553346613	2.86203839621788e-06	1.71129465991829e-05
GPR146	0.55471012368421	0.212452245386473	-1.38459546404082	7.18882657440395e-07	5.36104741715188e-06
TCEAL5	1.07641746315789	0.408370713958937	-1.39828638861043	8.127785463685e-10	3.24471571606642e-08
ENOX1	2.01779943684211	0.988856865258454	-1.0289491676067	0.000469551142331664	0.00135187787073331
CPOX	3.66715221052632	7.41356378019324	1.01550707990217	7.85030578602408e-08	8.79900164057167e-07
FILIP1L	30.6159100526316	6.14230183357488	-2.31743025418443	5.74221095533012e-10	2.65372177721328e-08
MIR100HG	7.42149415789474	1.15038064611111	-2.68959836230386	3.79949505618481e-11	5.36014479242072e-09
AL731567.1	1.07480645736842	3.08997880094203	1.52352004632438	0.00215336870800892	0.00500253767757549
MAP3K8	13.7280324210526	6.07103046456522	-1.17711154732549	2.3894453166309e-05	0.000104093713665999
CBX3	23.2060815789474	49.7195393478261	1.09930999028665	7.39962195610777e-11	7.67066888190332e-09
AL390728.4	3.51533047894737	8.31446899154589	1.24196380333275	1.02192086262385e-05	5.02076489798672e-05
CSKMT	0.746517463157895	1.66647152487923	1.15854875163265	4.6479265171395e-08	5.82169861422486e-07
P4HB	110.367355789474	233.727046690821	1.08251117311154	1.35712412815014e-09	4.50685310026214e-08
KREMEN2	0.274710462105263	1.52205102429952	2.47003296333183	1.47926203429308e-08	2.43896252631292e-07
PPP1R15A	111.246231052632	47.5975999396135	-1.22479572531562	5.98697204832579e-06	3.18857668301836e-05
STPG3-AS1	0.0548323651578947	0.232494509630435	2.08409703751856	1.74167430919268e-05	7.94144229972837e-05
AC104794.3	0.0142227226315789	0.21653278057971	3.92831587980731	0.000122426335983838	0.000423503934746451
AC020765.2	0.706540178947368	1.48512616519324	1.07174198679211	0.00207378199131559	0.00484321278355171
AP001412.1	0.112405472105263	0.342053137560386	1.60550819321372	5.57471437074868e-06	3.00743575422011e-05
CLCA4	68.7060933023684	15.4252050557826	-2.15514838423367	0.0164781398153485	0.0289250011558971
F10	7.18450221052632	0.606053576521739	-3.56737095877435	6.60971287949072e-13	1.81509137102606e-09
SLC6A8	12.6006597368421	31.8707878371981	1.33873541122879	0.00903459687007876	0.0172395139909781
AP002884.1	1.27590064736842	0.535673240002415	-1.25209086084232	1.116274974805e-06	7.7059114614666e-06
ODAPH	0.0165418771578947	0.805398653727053	5.60550819603741	1.17759903362088e-07	1.21938690219804e-06
AC092115.3	0.156896950526316	0.422594250072464	1.42945582558965	0.00646201014771322	0.0129134286706821
AL590652.1	0.45014018	0.971421396014493	1.10972291575735	0.00164979689172276	0.0039952981395723
CDCP1	6.09685773684211	14.9954580507246	1.29838780351928	8.60499664935719e-05	0.000312293137585859
PLA2G2A	124.472115	59.6192957588285	-1.06197133818422	4.04305369749384e-05	0.000162719469167904
TPSD1	3.24703168947368	0.703780911620773	-2.20592317463749	1.29168795500623e-06	8.73367246838987e-06
NPM3	19.4800810526316	39.4324108623188	1.01738223803458	1.1376525915893e-06	7.82756713457647e-06
PCSK1N	0.305058156315789	3.20887256487923	3.39491028695859	0.0007212629020211	0.00196684925027748
BRCA1	0.977620131578947	3.04407754516908	1.63865921150416	6.34587228885364e-09	1.31421193990906e-07
GREM2	3.17353855263158	0.412038119567633	-2.94524264966658	2.62081357035029e-11	4.81671372712599e-09
AC087857.1	0.52892423368421	2.12032223024155	2.00315054926774	0.0134255800295874	0.0242658855693236
AC010326.3	2.75127176315789	6.52898627004831	1.24676035539652	1.10430845090387e-07	1.15949297505928e-06
AL139289.1	0.301036091578947	0.860233827608696	1.51479240076089	1.77802072682495e-06	1.14563883576293e-05
AL445231.1	0.131463306315789	0.282807622077295	1.10516082885565	0.000233771963227498	0.000740798122693978
HSD17B6	12.3572887368421	2.34489092384058	-2.3977695217646	1.64090088058964e-08	2.61138449724372e-07
AC104667.2	0.108822176631579	0.53484868118599	2.29715819331868	3.87828019216882e-05	0.000157370612555501
AC016394.1	0.625090878947368	2.05970753429952	1.72030164159135	7.58726441227789e-09	1.48756365901327e-07
ADAMTS16	1.57870043684211	0.625320414200483	-1.33606992011278	0.0298532666157759	0.0483927760598132
BUB1	1.71134156894737	6.66002370555556	1.96039957441003	4.73793234204701e-09	1.06210065153916e-07
KIF12	0.169917986315789	1.09673661918841	2.6903066255558	1.91943189015381e-05	8.61586137678372e-05
LSAMP-AS1	0.0704272794736842	0.46874497821256	2.73459697537454	0.0227905278833467	0.0383033567426759
PYDC1	0.0450010673684211	0.271268185386473	2.59168873091046	0.0207319390646964	0.0353071681547889
TMEM255A	0.906996868421053	0.303573592113527	-1.57905127350728	1.57927821982462e-07	1.54755785453595e-06
AC239803.3	0.102677813684211	0.270463126956522	1.39730743845915	0.0109257955077932	0.0203011191436645
KLHDC7B	2.77586774842105	40.2717210278261	3.85875638786829	1.16327509878361e-05	5.59798170773964e-05
FAAHP1	0.0963637475789474	0.332439008557971	1.78652727250956	1.45348426149931e-05	6.78091439503188e-05
HSPB8	154.543717894737	21.6403183884058	-2.83622138030651	2.71450898436413e-09	7.07393501022558e-08
GOLGA2P5	0.451250089473684	1.1432046986715	1.34108462799214	0.000270617352615958	0.000839271634236896
CLEC3B	53.1329468947368	2.64764060625604	-4.32682752325519	5.37765461894236e-13	1.81509137102606e-09
PRDM6	4.01267018947368	0.5053070687343	-2.98933031553812	4.32852106728347e-09	9.92861134296329e-08
AC026333.4	0.140665675263158	0.556865050386473	1.98505741974249	2.54959510638547e-07	2.28452975076937e-06
ZDHHC24	2.21971178947368	4.79663310628019	1.1116497250749	1.48960945253457e-09	4.73721053523833e-08
ZNF107	0.976589415789474	2.66677687342995	1.44927307373767	1.99720503145002e-06	1.26216092977759e-05
AC110285.2	0.641680962105263	2.2116778382657	1.78521316625342	0.00657554494712044	0.0131098660974201
ALOXE3	0.149447413736842	0.503958301741546	1.75366643726881	0.00222190402855553	0.00514138276696821
CYS1	2.72147176842105	0.85558212713285	-1.66940881969452	4.8744509174875e-07	3.91361132652508e-06
AC245041.1	2.47805664842105	4.99919179608696	1.01248570979174	0.0195748487610573	0.0335755450501616
WDR54	3.83715993684211	8.46548855483092	1.1415544311787	6.25815367914418e-06	3.30579215883396e-05
ZNF436-AS1	0.998005536842105	2.10074850024155	1.07378372953495	0.00135028344997616	0.00336280440296027
LINC00456	0.0269272931578947	0.232696846111111	3.11131054049899	0.00950701764190832	0.0180200193974266
FAM110A	7.20510752631579	17.8418463357488	1.30817305212676	1.59561070243956e-07	1.55686297651703e-06
RNF207	1.58659424736842	3.59384430516908	1.17959468561692	8.8083797801404e-05	0.000318749527125891
AL591846.2	0.12609566	0.259586045700483	1.04169421056112	0.00564515821670702	0.0114669377092209
GBAP1	0.452751447368421	1.04387398422705	1.20515640289058	5.01961463033523e-07	4.00438049783078e-06
XRCC3	1.25063566315789	3.01141214589372	1.26777860787195	1.71397724217155e-08	2.69115941379622e-07
CDH19	1.3632849	0.217855966968599	-2.64564055520424	4.94285947180607e-10	2.42148491565267e-08
NFASC	2.88773148421053	0.503164143995169	-2.52083557639412	2.86170774126041e-10	1.71547294408983e-08
AGAP2	0.833334152631579	1.75092921615942	1.07115374935862	0.00333447786305248	0.00729363582938374
AL512353.1	0.198759647368421	0.402666369130435	1.01856009537063	0.000416466102584147	0.0012203894241428
GARNL3	1.58750577894737	0.562134978188406	-1.49777335086977	1.45595539630435e-07	1.45154575456209e-06
HIST1H2BD	4.7512688	26.4077419541063	2.47457621258152	2.56334362041572e-09	6.79322264828533e-08
LINC01535	0.298135972105263	0.800678902900966	1.42525333644384	0.00212659769468761	0.00494992776578058
PTPRN	0.0335744462105263	0.27851405997343	3.05231465106282	0.00174744537678292	0.0041957975796405
RNASEH2A	7.71575494736842	23.186668352657	1.58741630764197	1.73222720675149e-09	5.19197748886233e-08
FBXO6	5.46933989473684	13.3370629903382	1.28600237270355	2.1294232841189e-08	3.18869665442322e-07
PDRG1	7.38717073684211	17.220592205314	1.22104092935517	1.71227233757283e-09	5.15688055696292e-08
RPN1	53.3750989473684	108.995242705314	1.03002642300674	4.36256107481102e-10	2.2003960603946e-08
CFH	20.0223755789474	9.42563809396135	-1.08695096069857	2.5159186517777e-06	1.53068033927707e-05
MUC1	20.6476454210526	62.772334439372	1.60415159071252	0.0276636990655712	0.0453005747571402
RNU6-678P	0.148605694736842	0.326174990845411	1.13415676640435	0.0246342077511367	0.0409366460426266
GPC6	4.95282687894737	1.83576477454348	-1.4318709828364	1.94235205817488e-06	1.23206057023446e-05
AC092279.1	0.633862910526316	1.38491131402174	1.12755083435534	0.00769624014453321	0.0150202409115754
PDXK	7.4851422631579	18.1071958019324	1.27446149682926	4.63218030485334e-09	1.04968114806719e-07
C4B	2.34843140526316	0.992717123483092	-1.24224287199899	5.14897899860597e-05	0.000200228586426619
AC080013.3	0.309737967894737	0.792610158309179	1.35556321698944	0.002073766146633	0.00484321278355171
AC089999.2	0.192266739473684	0.483884812391304	1.33155444813295	0.00185051783297348	0.00439992955781731
SLC10A4	0.115413807368421	0.659372338951691	2.51427753729302	0.010632537655889	0.0198299146066034
AC027601.3	0.202279888421053	1.01573470929952	2.32809885375214	3.27913010681643e-06	1.91180478714087e-05
LINC00964	0.104440880894737	0.238229725268116	1.18966690657879	0.000150582142469838	0.000506317634519172
SELENOI	3.65692913684211	7.46046060024155	1.0286320328326	1.10573165048814e-06	7.63874924819918e-06
AC009065.2	0.325869094210526	0.873938882077295	1.42323985826249	0.00364933094877574	0.00788794129258841
WFDC1	7.40970010526316	1.41057097120773	-2.39313589789585	4.65114414249212e-11	5.93669507112787e-09
AL445228.2	0.158688486315789	0.322682479130435	1.0239177882805	0.016110264240877	0.0283688002329983
C2orf27A	0.782346405263158	1.64155484557971	1.06918350545406	9.12824765886104e-06	4.54667668763498e-05
APOBEC3B	2.95548603157895	11.322861612029	1.93777130753185	2.14372921265303e-05	9.46641356013387e-05
LPAR2	6.80154467421053	14.0603654082126	1.04769975448032	6.5895517840462e-05	0.000247725426014945
AP002360.3	0.262654562105263	1.05019499507246	1.99941867701263	8.54683097091761e-07	6.17509324907396e-06
AL354877.1	0.20748959	0.751172972657005	1.85610619894438	1.66406173331976e-05	7.63178971027603e-05
AP003352.1	1.51616694210526	3.18901722463768	1.07268327543251	1.59610322901316e-05	7.35815353463733e-05
PDZK1IP1	7.63904479421053	28.6211360432609	1.90561678095788	0.00533560070874297	0.0109256658406793
RORA	1.19716553157895	0.566055729951691	-1.08060664392791	1.66176116089648e-07	1.61051780278412e-06
AC060766.5	0.155980974736842	0.333998702801932	1.0984724276458	0.0203239782606592	0.034698708289786
KRTCAP3	13.60267809	27.7921737259179	1.03078796064079	0.00428544008329835	0.00903355940713706
AMH	0.193132300736842	1.65467483598551	3.09888636197307	3.559183528013e-06	2.04411330797119e-05
AL158166.2	0.0672485184210526	0.257074088792271	1.93460981573809	0.0125823417786001	0.0229451335204465
CADM3	5.87995157894737	1.09263915192271	-2.42798725024967	1.15427820019857e-11	3.59595885353336e-09
UNC119	3.93550547368421	8.38412665700483	1.0911115650731	1.04653467390286e-08	1.87010762727994e-07
LINC00960	0.455780657368421	1.19251924228502	1.38760094024556	0.00791348487126922	0.0153882018703626
AC004943.2	0.43930847368421	0.944425607850242	1.10420283299687	1.30070548644783e-05	6.15980238319552e-05
SRRM5	0.243529879473684	0.614467412560387	1.33523770914808	2.10813136201026e-05	9.33778771137831e-05
AC135721.1	1.48901741578947	3.12900329403382	1.07134254935144	7.41640052424588e-05	0.00027468204310388
DBF4	1.33284007894737	3.69606980072464	1.47148831369013	3.19071086045997e-10	1.81416084469123e-08
HKDC1	0.361955241789474	0.820318879821256	1.18037352343953	0.0240448369408011	0.0400972993108582
SUSD2	1.06266823157895	3.63404739492754	1.77388598203875	0.00903459687007876	0.0172395139909781
ENDOU	3.18820763263158	0.329699182012077	-3.27352337539793	1.80126076557547e-06	1.15782993300762e-05
OXER1	3.49259652631579	1.11959956903382	-1.64131715184883	2.08408026586355e-09	5.92478758006027e-08
HIST1H1B	0.0480491136842105	3.75349965328502	6.28758272027172	1.71707134183613e-07	1.65812710174325e-06
AC132807.2	0.245775968421053	1.50907056548309	2.61824450582814	0.00362168160814178	0.0078395952945967
ADAM33	7.97634826315789	1.03024747927778	-2.95273746827448	2.4966581229183e-11	4.75155107568729e-09
LINC01781	1.47267245315789	0.277064031618357	-2.41014524889869	0.0119459506596971	0.021981158402265
AC010463.3	0.1789395	0.546295519130435	1.61020969943131	2.33993380690081e-05	0.000102174023781429
AC007919.1	0.00364760157894737	0.244015363792271	6.06388002087378	0.000139809876832999	0.000474882823862701
LAMC3	9.50705223157895	1.84688170968599	-2.36390662002121	9.55150195046673e-10	3.52092006083708e-08
FOXP2	1.77551098421053	0.27579528902657	-2.68656456672481	1.4711923303355e-08	2.42780268193247e-07
SGK1	29.4806745263158	10.3240511560386	-1.51376033892108	2.40941735242532e-05	0.000104866383167609
ETV7	2.95960076	7.47039512826087	1.33578197849219	0.000171169895690067	0.000565732033262767
GABRD	0.345272784736842	1.19573083942029	1.79208414657699	8.54698990984655e-07	6.17509324907396e-06
SUV39H1	2.48848647894737	5.23302248381643	1.07237590930939	2.43769308626728e-07	2.19263832107541e-06
ZNF485	0.721352821052632	1.49606857705314	1.05239933312665	2.01391399008945e-07	1.88464180528919e-06
MAP3K20	24.7597748947368	3.73666216449275	-2.72817615907643	9.40501533555814e-07	6.67674244196282e-06
AL691482.3	3.38187008473684	8.28166404828503	1.29209944054941	0.0308550307568267	0.0498137995829506
AARD	4.31749897947368	0.315876409758454	-3.77276373369039	5.71972052900213e-08	6.8182411871453e-07
HACD1	4.03383474736842	1.44605503743961	-1.480029519911	5.05550256006126e-06	2.76872138162374e-05
RPSAP52	0.0151788121052632	0.344938560809179	4.50620862234173	4.88214055553483e-05	0.000191319137935464
NCAPD2	8.41198994736842	21.339583147343	1.3430129633677	2.03919213054755e-08	3.08310732840159e-07
LINC02159	0.113150720315789	0.23019860297343	1.024633309277	0.0123686083371039	0.0226059028082097
SLC2A12	1.42753773263158	0.705186615528986	-1.01745188174188	0.00245490323704227	0.00560783818723711
AC006128.1	0.563499132105263	1.80994669961353	1.68346191910284	1.61197349521389e-06	1.05750872825881e-05
CAV1	101.173497894737	43.5561207316425	-1.21588405656389	2.14372921265303e-05	9.46641356013387e-05
NT5DC3	7.24282487894737	1.38658688985507	-2.38501446838126	0.0194385244079401	0.0333844424225336
AC073842.2	0.222126922631579	0.633157907608696	1.51118108454169	1.35752475121165e-05	6.39364529390171e-05
LINC01607	0.185720618421053	0.549756883743961	1.56565977382509	0.0023346722571134	0.0053775418070487
CDK1	2.77573871578947	15.8116229130435	2.51004177775563	5.34224172385751e-11	6.46686977191861e-09
LINC01820	0.0270766015789474	0.391268427391304	3.85304011882468	0.00131976179475654	0.00329905283173687
TMEM125	2.99816981052632	6.6080303307971	1.14013821167884	0.00122008298110284	0.0030844000235021
LTO1	1.76724488421053	4.83053367729469	1.4506806211795	2.0046834901616e-05	8.93865882269537e-05
CCL19	44.3653497736842	13.4284176418357	-1.72414403005427	0.00134149488231267	0.00334318387476738
SGO2	0.722475742105263	2.11920349927536	1.55250107751971	3.60313816208473e-08	4.76767851447079e-07
SH3RF3	2.94527868421053	1.34923114304348	-1.12626662503374	1.99720503145002e-06	1.26216092977759e-05
HMBS	3.57855768421053	7.44391007971014	1.05668239293807	5.06947902877441e-09	1.12168201670866e-07
FOXF1	26.8625915263158	3.78105118937198	-2.82873920686884	7.89581235478578e-12	3.18559161070735e-09
TYMSOS	0.644172524210526	2.42452325193237	1.9121820575942	1.03815994808463e-07	1.10802019942616e-06
CCHCR1	4.11309010526316	8.46971387439613	1.0420905557282	3.62428400687666e-06	2.07514314376035e-05
IFFO1	3.15859511052632	1.53143653357488	-1.04439743539557	1.82745784937755e-05	8.25634279505682e-05
RGS20	0.133302836526316	1.15485462543961	3.11493187008896	1.06957850323409e-06	7.42178308290726e-06
LINC02489	1.39345265789474	0.166682919589372	-3.06348580768954	8.05206674602977e-11	7.99369991300299e-09
HTR1B	0.987215933684211	0.201044166014493	-2.29585320779644	1.27711224492486e-05	6.06951799684021e-05
KRT34	0.0597748295263158	0.975866796688406	4.02907422146989	0.00248571354751251	0.00566562722205749
MIR27A	12.1829154578947	0.785635368115942	-3.95485573240655	1.61249931863159e-06	1.05750872825881e-05
MATN3	0.312134316842105	1.54952365417874	2.31158589382558	4.31614003292555e-08	5.50535251106608e-07
MST1P2	0.293411237368421	1.27826851405797	2.123194890723	1.07467352786284e-06	7.44062708608504e-06
TBX5	2.66855189210526	0.41092524534058	-2.699109195116	1.47078179320437e-07	1.46330382599107e-06
SRF	45.7377721052632	16.5969764879227	-1.46246564733753	2.16874295935669e-11	4.47166199411094e-09
CPE	20.1845450526316	10.0799562864734	-1.00176168736889	1.14340333683153e-05	5.51083401206524e-05
DDX60L	1.19505761578947	2.92151237379227	1.28963522499599	0.00013548038628582	0.000461933216042312
AC091057.4	0.139062810526316	0.835860881811594	2.58752619193473	2.08641173474891e-10	1.46076639834135e-08
MAGEA3	1.72202778031579	11.396173008901	2.72636910688589	0.0100533378112076	0.0188895230674633
RAB26	0.498409916842105	1.33155060021739	1.41770257439899	0.0291538695291702	0.0474016032125292
SNORD116-4	1.26516384736842	0.4678757352657	-1.43512692045911	1.12062383142088e-05	5.42893492097856e-05
KCNAB3	0.306700714105263	0.692591390845411	1.17517292873829	0.000396282031071593	0.00116891050919609
NDC1	4.40504868421053	10.1354093478261	1.20217448850902	5.93328794938454e-09	1.24945321879127e-07
TANC2	1.57141780526316	3.77465113429952	1.26427649960871	7.59734682575851e-06	3.90438286748033e-05
NHSL2	0.986100344736842	0.236036097661836	-2.06272694964468	7.93772713592208e-06	4.04612528309332e-05
DOLPP1	6.24591789473684	12.6303842584541	1.01591302164037	4.92244667394106e-07	3.94273680196559e-06
FDX2	1.15423717368421	2.4959322442029	1.11263906991804	7.33779160222321e-09	1.45692046383613e-07
WDR4	3.59659115789474	8.53393983816425	1.246581769394	2.31164407965548e-09	6.39725337265129e-08
HOOK1	1.60990663957895	3.55884238411353	1.1444310122783	5.75808152880115e-05	0.000220128124948851
DDIT4	50.9247728421053	111.268908347826	1.12761097460315	0.0236962728766046	0.0395880302719021
AC008966.2	0.687186521578947	0.318311102729469	-1.11026426062197	0.000162272384703047	0.000540514247147749
EPN3	7.75028564157895	17.3396812831401	1.16175599304497	0.000246095991246406	0.000774230191883084
ABCC4	7.87284372631579	3.47645618586957	-1.17926743421472	7.71316968271779e-05	0.000284270679153082
Z98257.1	0.462736778631579	3.92861441812802	3.08575690354968	4.07330009899414e-06	2.30634499662004e-05
PHETA1	3.41379	7.08706897608696	1.05381477696592	1.60550654788411e-08	2.57911980804363e-07
Z94721.1	0.0966348268421053	0.373934485797101	1.95217039871865	3.13645050660004e-06	1.84191614570693e-05
HIST1H2AI	0.129612292105263	3.19010686463768	4.62133030189166	2.22779369889346e-08	3.29913916119479e-07
KPNA2	17.7959719473684	57.5337878864734	1.6928587274873	5.7369014219098e-09	1.2287840340102e-07
FMR1-IT1	0.270234979473684	0.546203725700483	1.01522472430421	0.0129988405730812	0.0236174344604166
IGFL3	0.053702	0.620837166690821	3.53116720370368	0.000542072031744295	0.00153384067736664
CCDC151	0.151843745263158	0.427317873519324	1.49272217986906	0.0116482908883848	0.021479797530182
HIST1H1PS1	0.188789963684211	2.96483519538647	3.9730979363901	2.33197857411132e-09	6.44402267835798e-08
ATAD3B	2.79365922631579	5.77138258961353	1.04676092167745	4.37643811710258e-07	3.59051632668105e-06
PDZD7	0.0686841110526316	0.307662672487923	2.16330111890946	3.22277739620458e-07	2.78787331880989e-06
ARRDC4	10.7948100526316	4.74646981881642	-1.18541104297914	1.54278658894714e-05	7.14748265886795e-05
CHIT1	0.0712556178947368	0.917104134910628	3.68600988968189	0.00254794202826233	0.00578641830883954
YEATS2-AS1	0.147890477368421	0.412966821304348	1.48149671624531	4.41960988811777e-07	3.61487098216015e-06
AC016205.1	0.125293339631579	0.485598429845411	1.95445403110332	0.000234746850948617	0.000743761425928555
TPPP	8.25611502631579	0.903326594792271	-3.19214348206631	8.99836675198472e-12	3.18559161070735e-09
IL16	2.05560564210526	0.866757236908213	-1.2458636348476	8.71232878718952e-07	6.27040372205742e-06
ATP5MC1P4	0.160085014210526	1.23509338929952	2.94770996612788	2.38524287097237e-10	1.57032673642297e-08
AC010359.1	0.277392465263158	0.59240167236715	1.09464711274577	0.000127480155215798	0.000438240318571091
HOMER3	7.00808652631579	17.5294700507246	1.32268988874031	1.288019381662e-07	1.31129178828671e-06
TMEM88	9.9772812631579	3.77917710289855	-1.40057461622966	1.82955104741626e-08	2.8323322031907e-07
PYY2	0.579451505263158	1.31315986009662	1.18028272508627	3.32453554033126e-05	0.00013740478211233
SNRPGP9	0.113234273157895	0.627111263115942	2.46941073941271	2.43966796048021e-08	3.54573895759025e-07
CDKL1	0.642877221052632	0.197944832161836	-1.69944483015328	3.69337990591814e-09	8.79427502217539e-08
AL513327.2	0.0556222547368421	0.258323079710145	2.21544241295105	4.86665859187043e-05	0.000190798331120817
AC010201.1	0.183518963684211	0.394538679951691	1.10423759701064	0.00638194520058797	0.0127713777515606
CSDC2	4.4824688	1.30472493202415	-1.78054785792399	6.09866639938423e-07	4.67444318580651e-06
ILK	9.11717352631579	2.66607747847826	-1.77386792754263	3.59159829830471e-06	2.06083054651655e-05
GPM6B	2.84110140526316	1.00354887780193	-1.50133944065161	7.63420619705808e-10	3.14412731821732e-08
HMGB2	24.8188183684211	60.2475920917874	1.2794691525284	1.41360562979558e-06	9.46591093213935e-06
TNXB	11.8447210157895	0.711349784516908	-4.05754127277619	1.34644762334093e-11	3.7152054054038e-09
AC022893.1	1.77222386736842	0.330960449033816	-2.4208301314919	0.000338638647421646	0.00102103116528561
LINC01833	0.236757102368421	1.50938367889855	2.67247996920715	0.00191484544106274	0.00452896067196019
SLC8A1	2.551852	0.565574557898551	-2.1737555316373	2.17083718477357e-06	1.3550039287394e-05
MAD2L1	1.42402835263158	5.49243964806763	1.94746924125983	3.11359457138204e-09	7.81021055385578e-08
H2AFZP3	0.187076667368421	0.416504416328502	1.15470215946516	0.00146862152100535	0.00361481524482017
SCARNA22	0.105836515789474	0.973864101280193	3.20188299120588	0.000808128645328236	0.00217451853897801
AP005329.1	0.223606654210526	0.494041330096618	1.14366861729725	3.69723039883937e-05	0.000150806812985702
KCNS3	3.12643300526316	6.71850357922705	1.10362233269406	0.00850424791129174	0.0163757392815647
U62317.2	3.40784692105263	8.2651063647343	1.27817285405976	6.59909806050227e-06	3.46249655786365e-05
RSAD2	1.32031223684211	6.50329068688406	2.30029076269124	0.00250107494659829	0.00569717970414274
MYOCD	11.4634176947368	0.520912109265701	-4.45985344725317	1.22964068689408e-11	3.59595885353336e-09
MEN1	6.00783705263158	15.0319179009662	1.32311150335532	1.32912301353873e-11	3.7152054054038e-09
BCL2L2	23.9360166315789	10.6795899637681	-1.16432682606572	1.07467352786284e-06	7.44062708608504e-06
LINC01767	0.218294597894737	0.881903373623188	2.01434416592075	0.0163578640952459	0.0287411641701002
FAM13B	8.13667052631579	3.73534935338164	-1.12319539438615	0.000145044894082247	0.000490267942292416
AC098614.4	0.492289936842105	0.228471477415459	-1.10749417980547	7.76806397485708e-05	0.00028594560128981
AL442663.4	0.760748974210526	1.74564029009662	1.19826391662171	9.2080444224641e-06	4.58034647227669e-05
PLN	55.9697279473684	4.35733503067633	-3.68312878536979	2.15248982350452e-08	3.2131148476113e-07
PAX8	0.863896271578947	1.74848801139855	1.01717790130819	0.00341596322324538	0.00743978153891504
IGFL2-AS1	0.330237640526316	5.22767981681159	3.98459430884332	2.48018546667025e-06	1.51335674507753e-05
MRPS26	30.3291926315789	68.0280043478261	1.16542167351857	2.23322355472013e-09	6.24470544816897e-08
AC006449.5	0.279662475789474	0.878154841014493	1.65078865536413	4.5814447790823e-06	2.54399669694943e-05
ZNF25	4.27463568421053	1.99993474009662	-1.09584854402794	1.49117055359967e-05	6.94091617394954e-05
SLC19A1	0.952902342105263	3.43563673405797	1.85017722896611	7.81685694882403e-10	3.16776861621566e-08
FCN1	1.95774627368421	0.695662313384058	-1.49273473023542	4.27887171286656e-05	0.000171109382589894
KRT8	163.602229052632	382.505648120773	1.22528864606847	0.000255270020853772	0.000798005898247138
DPRXP4	0.0905049873684211	0.349549075265701	1.94942581766373	3.30832922895999e-06	1.92657297712527e-05
FBN1	11.8965613842105	4.52533166178744	-1.3944491967511	0.000721412169717507	0.00196684925027748
BBC3	2.50067082105263	5.83934117101449	1.22349044586337	2.23187030682751e-06	1.3852657150845e-05
AL162574.2	0.0941211194736842	0.545176238043478	2.53413229731167	0.0178252650452559	0.0309594971807957
RUNDC3A-AS1	0.0426284723684211	0.211532041060386	2.31098694597451	5.72703925408216e-06	3.07370649286255e-05
AP001619.1	0.0756308915789474	0.214553315821256	1.50428866601566	0.00896830299354767	0.0171461452076559
LINC00958	1.93528156789474	5.51259227973672	1.51018741915085	0.00186135159136999	0.00442403996099053
SLC25A23	27.0246749473684	7.30694523961353	-1.88693696481958	5.5599198109491e-08	6.67866679979757e-07
HAND2	7.85854666315789	0.92201394865942	-3.0914020476134	3.59958111212708e-10	1.97485220960139e-08
AC037487.3	0.436565657894737	1.15626690724638	1.40520390986162	0.0122392449482744	0.0224065716620619
GZMM	4.15387937736842	1.70132804057971	-1.28779798278917	0.00954215162679334	0.0180665429688681
CAPG	60.6819806842105	128.724845509662	1.08495045706091	0.000212405922646991	0.000682777510129432
Z83851.2	0.631549636315789	1.38229836763285	1.13010102208042	0.000129437613220445	0.00044350583215033
NCAPG	1.11157983631579	5.35198782898551	2.26746326524856	1.65374237384449e-09	5.07012551641245e-08
SLC35F2	2.69769246315789	7.05272859258454	1.38645563162912	1.40037281061365e-06	9.39742312072386e-06
CCDC17	0.328065173684211	0.672265641062802	1.03504896626923	0.00133279756633649	0.0033254362682409
PSMC3IP	1.17745637894737	2.71023852463768	1.20274621340029	3.06997864435881e-08	4.21067319474447e-07
AC079313.1	1.41893818210526	0.230833547826087	-2.6198869217542	3.2874923658632e-06	1.91562792735066e-05
AL645608.1	0.196132725263158	0.628368687149758	1.67978101699386	0.000457479816279373	0.00132199195947172
AC093895.1	0.278969113157895	0.833108920094203	1.5783997259932	1.84480420497769e-05	8.32068781201836e-05
SPATA17	0.124733313684211	0.550032916618358	2.14067112844808	7.69027440304714e-07	5.65853406370092e-06
SNORD69	1.28103231578947	2.76727128236715	1.11115721171052	0.0179152230927074	0.0310869629971764
HIST2H2BE	4.38892015789474	18.2410577009662	2.05525145565275	8.30463459117608e-07	6.02784753710781e-06
MDK	52.5789827894737	159.9149332657	1.60474653118442	1.19370196844101e-05	5.72970837397254e-05
METTL27	1.10855264526316	2.83819318514493	1.35629550602358	0.00504959584438147	0.0104116007503439
CMA1	6.70368070631579	0.853566071932367	-2.97337869838689	5.7977229374442e-09	1.2341991650099e-07
AC091390.4	0.298473761052632	0.60361068821256	1.01601424291045	0.00116907486440347	0.0029674447620133
AC007406.3	0.0796699421052632	0.427096374202899	2.42245421874866	5.66860078084523e-07	4.42797487306407e-06
MMRN1	3.73732886315789	0.530452969251208	-2.81671076762377	5.42348714998629e-09	1.17916807412639e-07
ODF2-AS1	0.106990691578947	0.219766329855072	1.03848508507649	0.018621306955129	0.032145697156968
LINC01748	0.54836973	1.44652283691546	1.39936825824626	4.43346937576499e-05	0.0001763518886951
RAB19	0.377373336842105	0.776889438091787	1.04171680464723	0.00191005895833372	0.00451884691762169
AL033527.3	0.0293856242105263	0.364655062536232	3.63334997373407	9.24443128052195e-10	3.44837503213585e-08
NKILA	0.337972871578947	1.26442714671498	1.90350456077906	0.00959428282128985	0.018139613923404
AC007497.1	0.132427415263158	0.362965273405797	1.45462970409266	0.000191334948072766	0.00062489427862303
CD80	0.144241750473684	0.343082842405797	1.25006816833717	0.0187655539144749	0.0323398386390231
MKX	2.16021074263158	0.312595534589372	-2.78880298877947	2.95584568174356e-06	1.75786156977985e-05
DCAF12L2	0.607080792631579	0.205540928748792	-1.56246282657613	0.000798126953115165	0.00215130814844129
ECSCR	6.80158110526316	2.52965571980676	-1.42692910542222	6.91658820289322e-07	5.19311502404504e-06
COL14A1	30.0334598421053	4.66248665519324	-2.68739918108356	4.42218812222291e-11	5.91744237594277e-09
TMEM52	0.293000143684211	1.54544770229469	2.39905155720771	2.66180444084503e-05	0.000114000396495866
LGALS2	4.11906013157895	1.98919730014493	-1.05012880921675	0.00325476537454019	0.00714510169305052
FRMD6-AS1	0.148705708947368	0.306755030821256	1.04462696963529	0.00206076723722877	0.00482061783719279
TAGLN2	213.369135789474	470.638800072464	1.14126876016497	8.14910309738448e-06	4.13471123353772e-05
AC015660.1	0.0353265994736842	0.2390274402657	2.75834946089813	0.0209771097344804	0.0356483570281728
IL37	0.00795817421052632	0.675101413309179	6.40652294788188	6.57519188907372e-09	1.34536887038921e-07
AL390879.1	0.348425163157895	0.843705972463768	1.27589149543833	5.62614586091761e-06	3.0264729010435e-05
AC010491.1	0.0910442552631579	0.291242012352657	1.67757858914159	6.03980557502578e-07	4.64257700605015e-06
AC105052.2	0.301308679473684	0.621556493309179	1.0446432921924	6.82796309146486e-05	0.000255459763679273
NRXN2	0.91262282631579	0.273907324442029	-1.73633089352886	3.5271787557388e-08	4.68368400523193e-07
HIST4H4	0.265824644736842	0.853776901328502	1.68338426764362	0.000206209863304663	0.000666284770998001
MAGI2	1.54099070526316	0.4774360552657	-1.69047873418346	2.37228933852493e-08	3.46391166215901e-07
CAVIN4	0.125489109473684	0.351725605990338	1.48688820263877	1.52323297637487e-05	7.07611298235248e-05
NAGS	0.358568278947368	1.69425838572464	2.24033414238216	2.10824522626134e-09	5.96636578889012e-08
SMIM10	9.60799321052632	3.23793635072464	-1.56916050521995	8.14675598898765e-07	5.92241699424158e-06
AL121917.1	0.176563114210526	0.457316057294686	1.3730075948538	2.9270641647307e-05	0.000123500123505379
AURKB	3.30630915210526	16.4408569939614	2.31399196935315	9.32940821761443e-10	3.46629081954653e-08
RNU6-611P	0.314796263157895	0.701961859903382	1.15697423068922	0.00812300755898316	0.0157515492795784
AC013356.2	0.0979394868421053	0.219126318140097	1.16180022732876	0.00174468038412675	0.00419523747883765
VPS9D1-AS1	1.23461502368421	4.27004033768116	1.79018844624861	3.29759588221736e-05	0.00013652425317309
DCST1	0.057336991	0.247425951524155	2.10945872661492	6.24001095206619e-08	7.32869331416249e-07
PLCB4	6.15381375263158	0.952328864347826	-2.69194901520579	6.54447246702128e-10	2.8824867816601e-08
DTYMK	7.03981031578947	16.7495821545894	1.25051664386484	1.35712412815014e-09	4.50685310026214e-08
AL603832.1	0.115161736315789	0.40838132910628	1.82625546279795	1.44978611761533e-06	9.69089309754772e-06
AC084880.1	10.6346684736842	1.60261268497585	-2.73027735310416	1.47236338384131e-09	4.73053719729161e-08
LYPD6B	5.34445415984211	10.8626055391304	1.02325567892085	0.00233583357663941	0.00537757612251353
RFTN2	0.910463889473684	0.439577391328502	-1.05048461219915	2.11140867475592e-06	1.32186723271423e-05
TACR1	1.08437042631579	0.239757290152174	-2.17721108450712	1.49879923556754e-10	1.20726053500124e-08
LDB3	1.92289752105263	0.345926484144928	-2.47474450186223	6.44871844061118e-11	7.28899422296311e-09
PNMA2	0.842754094736842	0.324769467475845	-1.37569572499742	4.79757147294398e-08	5.95349428219894e-07
MS4A15	0.0214860534210526	1.41264728062077	6.03885696701404	0.000691390644999453	0.00189768324636114
AC004076.2	0.129517482631579	0.28909919147343	1.15841772395847	8.34071454484779e-05	0.000303759369186683
HPSE2	9.24653222631579	0.859921791705314	-3.42663504540287	3.38503068510562e-10	1.89258154124678e-08
COL4A4	1.68019203789474	0.466994654702899	-1.84714819373561	1.46774810263363e-06	9.78308426079186e-06
AHRR	0.85682924	0.423405906318841	-1.01696631965664	0.00624783299548083	0.0125270453616378
MIR4635	0.398178289473684	1.21902073550725	1.61423620047405	0.0136251372897958	0.0245674083190888
BID	5.61025126315789	14.2301441763285	1.3428129884081	8.49032192211263e-10	3.31883146301248e-08
AC117402.1	0.142234972105263	1.01785443567874	2.83918311783322	0.00603148905113006	0.0121451844887694
LDHAP3	0.265717330526316	0.626376305048309	1.23713731263007	0.0120798311636674	0.0221688059589096
STAT1	26.6203368421053	53.357959442029	1.00317466827647	0.0109827479271778	0.0203948237685706
ADAMTS12	0.476758761052632	1.78088217615942	1.90126071508277	0.0036059726798976	0.0078064919110325
PI4KAP1	0.539529778947368	2.7712088121256	2.36074092727905	5.71240433577534e-05	0.000218649209612715
CFAP53	0.443085963157895	1.23741661057971	1.48167277687225	6.03949261506581e-05	0.000229576580098217
SERINC2	60.8495358473684	158.690301090821	1.38289579215027	3.012750848838e-05	0.000126574662285596
AC243562.2	0.798005695789474	0.287500901376812	-1.47283256454169	8.36146780204994e-06	4.2263352122669e-05
AL390066.1	0.170968207736842	0.345988681545894	1.01699676843269	0.00112370527226186	0.0028725029227777
AGMAT	0.922117473526316	2.45399817777778	1.41211171753431	7.46509468254293e-06	3.84695335151203e-05
CYP2C9	0.0370755946315789	0.769147236971015	4.37471806164226	0.0123168778080105	0.0225333052175995
HSD3B1	0.0226453921578947	1.93949819265459	6.42032209801041	7.23270079395557e-05	0.000268620674974245
B4GALT3	9.86929826315789	24.0612395410628	1.28569155296403	3.10300243251199e-08	4.2435593761824e-07
TFR2	0.190288216105263	1.12755792964251	2.56694342722577	1.87650671441672e-07	1.78092541641886e-06
CITED4	9.546454	23.8605508891304	1.32159049888856	0.00198423961630441	0.00467188956214326
EEF1A1P4	0.665903152631579	0.330354949347826	-1.01129541121956	1.0131044076516e-05	4.98790142565392e-05
RBP7	10.6042688421053	4.84684046531401	-1.12952864953722	9.13926146974267e-07	6.53755100864589e-06
TNNT1	0.276701502105263	5.79879564971739	4.3893509174985	3.73860441370827e-07	3.15553012210564e-06
RGL3	2.53464692894737	6.71141165323671	1.40483145262312	0.0119624697928914	0.0219964544025893
AP005899.1	0.294139228947368	0.592823707971014	1.01110393716161	0.00446541965214278	0.00935731147835512
AC020891.2	0.216525848421053	0.66327040910628	1.61505790219305	0.00160063724885554	0.00389126155743411
SPATC1L	2.78076254736842	6.08483494195652	1.12973757223852	0.000228669429116684	0.00072757788579246
PPP1R14C	1.78722147052632	7.32300736470048	2.03471782410398	7.20705263317734e-06	3.73764602030784e-05
SDC3	23.9278330526316	11.937063465942	-1.00324177446674	0.00015998833067931	0.000533569329636668
AL645940.1	0.162621812105263	0.552956568623188	1.76564539408745	2.92656535640406e-05	0.000123500123505379
PRKCZ	1.65212476842105	3.64844217514493	1.14295794522769	5.3223446798079e-07	4.19945976565331e-06
AC010719.1	0.333171118947368	1.0863987568599	1.70521848313264	7.15656501852119e-05	0.000265950939676199
OR7E128P	0.0850239389473684	0.245383192318841	1.52909543194431	0.000312744262028878	0.000951697029591885
LINC00355	0.114974561526316	0.705113755756039	2.6165413299929	8.52361606048745e-05	0.000309879108976799
BLK	1.551948834	0.518591282272947	-1.58141113505671	0.0134019530078026	0.0242255148637187
HIST1H2AG	0.225055744210526	1.94573759623188	3.11196286726636	7.75814119006575e-09	1.51158881774874e-07
PQLC2	3.60901710526316	9.28306753381642	1.36299563299793	9.98778935248357e-12	3.40728893855726e-09
RN7SL333P	0.148213385263158	0.423705183671498	1.51538503454293	0.0302258528170114	0.0489240576609373
AC018904.1	2.49906306315789	8.69911717874396	1.7994816900284	4.70633040439214e-06	2.60563226254381e-05
PRSS41	0.02517554	0.447472348985507	4.15170390692343	0.00894752365587602	0.0171081612509122
CKMT2	1.74239254210526	0.350146050748792	-2.31504096335476	7.25642063488299e-09	1.44381994032142e-07
RGS9	1.16890204736842	0.378964751717391	-1.62501846702081	6.41728825549223e-09	1.32607636257735e-07
PXYLP1	1.62640454736842	4.30665260048309	1.40488079811973	2.65843149282126e-06	1.60437922482487e-05
FABP6	3.02485831894737	12.0328335483575	1.99203694032333	0.00123200826135957	0.00310748479600244
AC010422.4	0.0984279115789474	0.271768358357488	1.46523810550428	0.000258057002056158	0.00080564451407316
NFATC2	4.2782822368421	1.65950162669082	-1.36628161616192	1.19370196844101e-05	5.72970837397254e-05
SLC3A2	21.4342426842105	44.9663951135266	1.06892978533037	6.6576225873559e-06	3.49027584818549e-05
AL109811.2	0.362264072105263	1.16525836439614	1.68553623148901	1.93161206151022e-08	2.9537764555922e-07
AC073534.1	0.213701068421053	0.71127072884058	1.73480467213488	0.003660799753083	0.00791058226040497
KIF11	2.47958255263158	9.19840895072464	1.89128708197977	5.86711004783735e-09	1.24389362517031e-07
METTL7B	0.618615635789474	3.67715859350242	2.57147619662994	7.89656481151608e-05	0.00028972156150889
KIAA1024	0.0758725237894737	0.244710341183575	1.68942563658263	3.35318322926201e-07	2.88339949269675e-06
BNIP3P39	0.0212740131578947	0.210621172101449	3.30748635053903	0.00251691786332585	0.00572979008366694
KIAA1755	1.16397058947368	0.567766266277778	-1.03568556625823	0.000247904792784837	0.000778617715868713
C2CD4B	6.84373763684211	1.34846492837923	-2.34346645373448	1.5476792008192e-07	1.52276375694655e-06
OTOF	0.0476332665789474	0.470239224398551	3.30335349066973	3.25729745053737e-05	0.000135213876248745
NCS1	33.5492658947368	9.42038884951691	-1.83242268163332	5.19273095681335e-06	2.83477483103546e-05
SPC25	1.29576436578947	5.16388788574879	1.99465428974954	9.90289305674803e-09	1.79351334385872e-07
AC147067.2	1.00936254842105	0.4702900152657	-1.10182185495848	0.00718674879616142	0.0141450716104455
YWHAEP7	0.0603641509473684	0.247990307014493	2.03851981085531	0.00151879823483939	0.00372074830660549
AF274858.1	0.999046857894737	2.25530836021739	1.17470045061663	9.22884706810369e-05	0.00033159873140335
AC012625.1	0.0506314563157895	0.245499238792271	2.27761266496538	0.00123296944300611	0.00310901836569327
PPP1R14D	0.145986643157895	5.17948059804348	5.14889914778504	2.010602369916e-05	8.96292047202041e-05
IGSF21	1.50831562631579	0.722812576664251	-1.06124484103658	0.000132426222889724	0.000452754904094803
INA	3.44524681210526	14.293382793029	2.05266815310565	0.00761085179713401	0.0148783509345307
LINC01410	0.79084331631579	2.34350393671498	1.56720342023303	3.25021136589624e-06	1.89803037218522e-05
TMEM74B	0.449078925789474	3.36184646594203	2.90421291227013	5.93328794938454e-09	1.24945321879127e-07
PKDCC	13.4060440578947	2.59022340442029	-2.37173514073719	8.79968567591258e-08	9.69515574498812e-07
RF00275	0.0747931824561403	0.298842648993559	1.99840737866213	2.04656045669631e-05	9.10159133657096e-05
CORO2B	1.51519776842105	0.658666594637681	-1.20188582268893	8.73903508783355e-06	4.38072777722197e-05
AC099342.1	0.0304700573684211	0.220029891862319	2.85223541102387	0.00524104230511842	0.0107543391044332
MORN3	0.253609650526316	0.839897465193237	1.72760356928582	0.000276592397811764	0.000855821761237158
PSPH	2.86204052631579	6.85697347874396	1.26052784150817	3.12820029782474e-07	2.72490353705133e-06
NFATC4	8.38621568421053	3.23330015289855	-1.37501249360507	4.89991826851275e-08	6.04849779421742e-07
GALNT15	3.94845098421053	0.724322372990338	-2.44658293765358	6.37206968766437e-08	7.43989692281559e-07
JPT1	25.3791325263158	71.6817346642512	1.49796279250283	1.15569893127562e-08	2.01527686315283e-07
TFDP1	15.9226818421053	33.4385310024155	1.07042812127006	2.1610220823013e-07	1.98858545023145e-06
SAPCD2	1.40728053157895	8.81558987922705	2.64714715964272	5.81098601651021e-10	2.67234143695542e-08
KCNC3	0.403796929473684	1.64992472797585	2.03069836269925	4.79021880427717e-05	0.000188267439096465
AC007938.3	0.306744239473684	1.28585863439614	2.06762388733594	1.02367352061764e-08	1.83976879955448e-07
CYP1B1	12.0248447368421	4.89339676203623	-1.2971100982937	5.52693760830583e-06	2.98594674185552e-05
ZHX3	4.42772578947368	1.96102994975845	-1.17495430909796	1.56733406097914e-06	1.0333060079463e-05
LINC01842	0.184271682105263	0.503961267753623	1.45147847651037	0.00446675517412241	0.00935794186378504
NEGR1	5.59784155263158	0.395428648147343	-3.82338135106584	2.80063845484324e-11	4.86559067853923e-09
AL121782.1	0.0713184473684211	0.239063366884058	1.74504587379734	2.62200295689921e-05	0.000112603894438773
OMD	3.78422696842105	0.574205376480676	-2.72035987632789	3.48554293298491e-08	4.64813376343965e-07
AP000580.1	0.547229657894737	1.36553682036232	1.31924988910736	1.06710861071652e-05	5.20191579257565e-05
AIFM3	0.590578946842105	2.56710952466184	2.11994301639046	0.000528895782732217	0.00150040392673187
FDX1P1	0.0908724831578947	0.222810897198068	1.29390438627499	0.00921280534210088	0.0175492250389684
AC007731.2	0.0989882024210526	0.365416978019324	1.88421516833079	1.01728459324469e-05	5.00716443416845e-05
HABP2	0.00831209078947368	0.289996880654589	5.12468215949954	0.00551047721615697	0.0112347152022985
KIF3C	2.13353156315789	5.42150302318841	1.34544941695516	6.27875262395069e-07	4.80261864994647e-06
KLF2P1	0.0110027857894737	0.563249613830918	5.67783366903486	3.50518524210244e-05	0.000143880530950707
IL36RN	0.428875137105263	1.63364413189372	1.92946415827132	3.90232218774601e-05	0.000158209315489798
PART1	1.60464972	0.305508987289855	-2.39297167874033	8.66233198922228e-06	4.35080989738719e-05
F8	1.96387778421053	0.676449183478261	-1.53765168623883	2.43769308626728e-07	2.19263832107541e-06
GPR19	0.112264687368421	0.570057170410628	2.34420241057105	7.33675761016049e-08	8.34806446570293e-07
AC110285.6	0.0870738978947368	1.18625176951691	3.76802612151763	6.86033074312626e-10	2.96002801599314e-08
SOCS3	218.854062631579	48.5743875386473	-2.17170145477585	1.19448760566116e-08	2.0637358144586e-07
AC048341.2	0.943972836842105	2.21773821280193	1.23227182509967	6.20299399403957e-06	3.28034882497645e-05
AL138921.1	0.0995017626315789	0.234662252463768	1.23779180231004	1.78926979660484e-05	8.11507594723147e-05
AL109741.1	0.817262065789474	0.327454528140097	-1.31950419041638	4.39524854166999e-05	0.000175202992112501
STK40	18.7245721578947	8.85089904347826	-1.08103684290026	3.33401103726722e-09	8.166586043374e-08
AC005519.1	0.193569699473684	0.479256567294686	1.3079450640836	0.000135993051178006	0.000463512737375645
EPHB2	0.968470168421053	3.31279921879227	1.77427125201179	1.98791916577998e-05	8.87023241558377e-05
ZNF737	1.61806596315789	5.3431799147343	1.72342817334815	0.0305680533181432	0.0493927303141854
AC139530.1	1.24718487368421	2.52547406038647	1.01787888793667	7.73183749930442e-06	3.96156381757097e-05
SH3BP2	2.25856685789474	4.9321325173913	1.12680394190441	1.12725088753137e-07	1.17962121599281e-06
AL161452.1	0.141515524736842	0.383989725458937	1.44010737847382	4.38020175706258e-06	2.45044918094174e-05
C16orf89	13.4644925263158	0.700277685231884	-4.26508892992043	6.16838052832709e-13	1.81509137102606e-09
AL353804.2	0.0599824831578947	0.264684777173913	2.14166207012376	0.00108271892489218	0.00278517345595722
FKBPL	3.88737036315789	8.90875400966184	1.19642910383555	7.53030908997095e-08	8.51664794786769e-07
PDE3B	2.42288444736842	1.19589455671981	-1.01863540995887	0.000103644724108976	0.000367129688211576
ABCA9	1.61801224368421	0.488967986461353	-1.72641060708415	2.70763193245651e-06	1.62883427420172e-05
KCNMB1	18.0525886315789	1.50236905094203	-3.5868945718938	5.81098601651021e-10	2.67234143695542e-08
AC007128.2	0.0550716726315789	0.378770555748792	2.78194185361489	9.10057866202264e-06	4.53891965538359e-05
TOPBP1	3.80130036842105	8.5228700942029	1.16484631527855	6.48950231995892e-09	1.33542737509449e-07
AC022079.2	0.608670857894737	0.293641243188406	-1.05160767853282	1.72172116680598e-05	7.85810125341294e-05
GAS6	38.1097584210526	18.0235828521739	-1.08027463435427	4.87454547251991e-07	3.91361132652508e-06
SLMAP	21.487929	4.44348394057971	-2.27376326378501	1.17045928304292e-06	8.03267283384576e-06
AP001625.2	0.281976810526316	0.68308421852657	1.27648693982653	0.0103637572273673	0.019397025122902
STARD13	5.07642831578947	1.54261440072464	-1.71843631545925	7.01753767536077e-09	1.40673140387601e-07
PRKAG2	7.65465415789474	2.89505932874396	-1.40274428351214	2.87888030363227e-08	4.01012851796973e-07
LINC01138	0.546576126315789	1.23140937036232	1.17181610040075	6.65429122500808e-07	5.03852237995597e-06
AC091812.2	0.0248520526315789	0.211748851932367	3.09091722768024	0.000581879229600432	0.00163049581615784
NR4A1	151.426189473684	12.1058893864734	-3.64483376481549	2.33406733980702e-12	2.11941457358064e-09
E2F1	3.82913574736842	15.3603770869565	2.00412292224527	1.84953510230211e-08	2.85150592641697e-07
S100A7A	0.167886247947368	3.11635975771014	4.21430582524315	0.00106870009266099	0.00275629138674889
AL096828.3	0.160241254210526	0.817384997898551	2.35077014639782	6.74603485078509e-09	1.36986852711343e-07
MIR3942	0.264805221052632	0.730279407729469	1.46351698289022	0.000390687333924027	0.00115549597200765
HIST1H3G	0.0542936442105263	1.2620443169686	4.53883544017423	1.0129033727923e-09	3.67621784994656e-08
RNU6-312P	0.3896378	0.815608180048309	1.06574260013495	0.0156377285458893	0.0276515597687797
AC009097.2	0.0726928426315789	0.34007761263285	2.22597880843298	2.04178533517795e-06	1.28643446084432e-05
FZD7	21.8468697368421	6.38028705024155	-1.7757333446371	7.58726441227789e-09	1.48756365901327e-07
KIF24	0.34709473	1.19548283362319	1.78419204825632	8.29352886101712e-09	1.59274802476217e-07
LINC00346	0.565865284210526	1.19467149236715	1.07808342821739	0.000329040371710276	0.000995290100660956
TCF19	4.43856610526316	14.4370011086957	1.70160550385643	6.37206968766437e-08	7.43989692281559e-07
AC005476.2	0.377704726315789	0.817412812536232	1.11380602035477	0.00131552081514235	0.00328888968081491
TSC22D1	58.3317173684211	21.3561472608696	-1.44962914754037	2.89656436572102e-10	1.7198809238615e-08
ANGPTL7	1.97155006842105	0.157995055900966	-3.64137903048228	1.13640377554368e-10	1.01534971621553e-08
VN1R42P	0.158142351578947	0.446814458357488	1.49845208756779	0.00178468394463372	0.00427063191597532
C8orf44	0.806583042105263	1.75505487246377	1.1216211582179	4.33367331424316e-07	3.56166063929673e-06
AL024507.2	0.120010167894737	0.416562491111111	1.79537629566704	4.47837135524102e-11	5.91744237594277e-09
PRC1	3.21697899473684	11.1995642528986	1.79966418065309	1.15569893127562e-08	2.01527686315283e-07
RTKN	2.96096531052632	9.04063575990338	1.61035664151514	2.74843729560046e-07	2.4313497867681e-06
AC079834.2	0.176107392105263	0.449080417582126	1.35051834637261	0.000348496626401416	0.00104588535535028
AC069499.2	0.0135363836842105	0.249159783502415	4.2021569519995	4.2151430601984e-09	9.7761099182327e-08
FAIM2	2.56283656842105	0.274609372019324	-3.22228871266076	1.78695569106028e-11	4.1910812039205e-09
AC124947.2	0.265111264736842	1.27933962567633	2.27072942902598	1.72129582612199e-07	1.66135152188924e-06
AMOTL1	17.4275384736842	5.64262359492754	-1.62693079318684	0.000130426781313367	0.000446406001054853
PNPLA1	0.0669925103157895	0.40665096478744	2.60171931864111	6.74640625403884e-05	0.000252856550216966
RAD51	1.35049715263158	5.4078370410628	2.00156108022963	1.11260371327961e-09	3.9314093168108e-08
CRYBB2P1	1.07569121578947	2.23736238623188	1.05653494679519	2.27207789470302e-08	3.34886076498922e-07
AC010789.1	0.0622376373684211	1.43371847140097	4.52583065581022	1.13163038399984e-06	7.79470664280066e-06
AL137803.1	0.147405853684211	0.573613274396135	1.96028459394049	0.00146791398735941	0.00361481524482017
CEMIP	0.851655364736842	3.22237362971015	1.91978213699186	0.00042842686097246	0.00124977817046428
SLC35D3	0.0160999384210526	0.271193637043478	4.07419625378386	0.00791432234731864	0.0153882311090922
RSPO3	3.99287957368421	0.966500714154589	-2.04658685699118	1.369344927209e-08	2.30224183415972e-07
AC007773.1	0.313117293157895	1.24470540842995	1.99102923737389	1.10430845090387e-07	1.15949297505928e-06
AC131009.3	0.762437321052632	2.37737500845411	1.64067884721768	5.41567236994113e-08	6.56422872591766e-07
KBTBD8	1.21150960526316	0.573124687306763	-1.07988489631991	2.14372921265303e-05	9.46641356013387e-05
TCN1	3.71878275105263	16.9393266697899	2.18747415517728	0.00826555097308933	0.0159833590547331
CSAG3	0.172076927894737	1.81647572014493	3.40001650350418	0.00212332886159622	0.00494992776578058
RUNDC3B	0.745033910526316	0.210870694021739	-1.82094748294034	3.82285600207834e-10	2.04353980532752e-08
AL161891.1	0.119198593684211	0.293334149613527	1.29917782286266	9.6682209221978e-05	0.0003455330079299
AC124944.3	0.196221323684211	0.616047572149758	1.65055993232467	2.96704642314467e-06	1.76173076067922e-05
AP000894.4	0.814384947368421	2.38471031149758	1.55003122116317	1.56922906071191e-05	7.24494214225826e-05
KRT6A	160.732231660526	414.869092116345	1.36799691806368	0.013900530531172	0.024985203801572
AC010618.2	0.22815622	0.644810078140097	1.49885230772108	2.56246570904218e-06	1.55353269723426e-05
TMEM35A	7.76777148947368	1.0381116968599	-2.90353907997608	4.8925303236267e-08	6.04849779421742e-07
PFN1P6	0.151211088421053	0.433080155917874	1.51807013113579	0.0138040554482342	0.0248327413590813
LINC01694	0.0218786141052632	0.230422246509662	3.39668675194276	1.79667044852971e-05	8.1377977918809e-05
KRTAP2-3	0.00896382	0.399629465454106	5.47840547074747	0.00413746788810877	0.00878480366465824
CARMN	1.60150339263158	0.210643465074879	-2.92655179025857	2.93183106544189e-10	1.72444972667355e-08
CD99P1	0.518022542105263	1.07700121690821	1.05593309573823	8.00767884874687e-06	4.0728673960162e-05
TMEM201	2.32579789473684	4.67665693647343	1.00775186533756	4.04426893247646e-09	9.48532724750698e-08
CPNE1	29.4853468421053	60.2911111135266	1.03194715228079	6.24839040113502e-07	4.78134376413117e-06
ALKBH6	0.471378126315789	1.28560198019324	1.44748733740742	1.2217886505694e-09	4.16807644556976e-08
ZBED2	0.688144448421053	3.04115516474879	2.14383608893901	0.0033647264983153	0.00735037411664803
AP001189.3	1.08556786315789	0.378627145169082	-1.51960016540577	3.87302398683712e-07	3.25288939413719e-06
PPP4R1-AS1	0.258845866315789	0.593029526062802	1.1960106571986	0.00152677290932211	0.00373858620248804
SAMD5	1.57394116631579	0.774526554033816	-1.02299500748919	0.00109437697301961	0.00281015398176638
STX2	5.05470163157895	2.42943556661836	-1.05700476551424	0.00021084072228503	0.000679025827709238
ANKRD44	1.60440180526316	0.790189560797101	-1.02176480248345	2.29673852031525e-08	3.37724959691811e-07
ITGA8	10.5044422105263	1.1334468955314	-3.21221085209132	2.5980139206073e-12	2.11941457358064e-09
SIX3	0.291408455263158	1.12929867528019	1.95431245532414	0.0282875045471878	0.0462131865754362
FOXH1	0.0744863774210526	0.524491602280193	2.81587116890396	7.66098971253589e-06	3.93233389696561e-05
FAT3	0.597427578421053	0.195476339727053	-1.61176984115565	8.94603132254035e-05	0.000323123870748271
DNAH17	0.149754108421053	0.372754640700483	1.31563073071021	1.95479018013306e-05	8.75990641266697e-05
PIGW	2.46671626315789	5.100281947343	1.04798522498873	1.05977150455855e-07	1.12660015524261e-06
IL22RA1	0.943259853684211	2.56265339263285	1.44191119131873	1.95139090129988e-06	1.23737571750894e-05
PPM1N	0.873995584210526	3.22318945990338	1.88279109711345	0.00928528142900591	0.0176496540829134
PPM1K	2.59681672105263	1.20255978299517	-1.11063557797956	1.73055787006816e-07	1.66515165723533e-06
STK32B	0.948394578947368	0.318996662183575	-1.57194608790134	2.61370020160498e-08	3.72085408821808e-07
CAVIN1	221.933053157895	67.5416085362319	-1.71627610510275	2.83449409157574e-06	1.69752992787219e-05
ISL2	0.250818255789474	0.985534054115942	1.97426336455308	2.58563556727021e-08	3.68664774670904e-07
IFI27	19.1033178947368	88.4565256120773	2.2111453476956	0.00356293630848964	0.00772669601897724
DNAJC22	0.153021265263158	0.646480333618357	2.07887432569825	5.73516363894579e-05	0.000219475576907077
TSACC	0.151716974736842	0.677947040289855	2.15979006820693	1.11913805457203e-09	3.94706528532613e-08
AC107959.1	0.576341842105263	0.190808177502415	-1.59480175987994	2.47412963162632e-10	1.59526097175961e-08
AC093788.1	0.365490032105263	1.00049163316425	1.45280513677454	4.20657214666135e-06	2.37091959110264e-05
AC004884.2	0.08642687	0.324556365289855	1.90891723176333	0.0120353797064318	0.0220937119099677
AC079160.1	0.0485703822105263	0.290947990693237	2.58261253838396	0.000502653601962941	0.00143791576972567
BOLA1	6.02385563157895	13.7645713816425	1.19220058645838	2.2496907166936e-07	2.05907058133278e-06
MYCN	0.992559588947368	3.96878435831401	1.99947155335202	0.0247588006216409	0.0411033777289319
C8G	0.361272062631579	0.906347704154589	1.32697892604163	5.38125491173256e-06	2.91732350671374e-05
TMEM191C	0.0401597721052632	0.24234302915942	2.59322759735067	8.62924595250483e-07	6.22495746037763e-06
ARID3A	0.978478484210526	4.28603756961353	2.1310324632777	0.000500147979421406	0.00143096623023541
AC068790.5	0.110690416315789	0.443277709541063	2.0016805000454	2.65338326785612e-05	0.000113795269153793
AC002398.2	1.53040953684211	0.14256454236715	-3.42423065434753	7.76770296210661e-13	1.81509137102606e-09
CACNB2	3.09944000526316	0.46075973236715	-2.74992103400706	5.01961463033523e-07	4.00438049783078e-06
LINC02014	0.115223143157895	0.546427027463768	2.24559832564648	7.75783531583458e-06	3.9737991818456e-05
TMEM206	1.83687855789474	5.66506185144928	1.62483545928324	3.91587929011136e-10	2.06386637978538e-08
AC004980.2	0.3087166	0.687010426908213	1.15404893511678	0.00114950018852978	0.00293004646615735
AP005432.1	0.0279410832105263	0.215398214913043	2.94654643690817	0.000919113324949568	0.00242686790262155
S1PR5	1.36744508842105	6.18389673710145	2.17703332752442	4.4198574287408e-06	2.46521558688294e-05
AC019077.1	0.100179699473684	0.223161562198068	1.15549836701935	0.00227150788228771	0.00524557567942945
FCGR3A	4.59462210526316	19.5905932337923	2.09214297142883	0.00782593864869234	0.0152416531934206
ARHGAP8	0.178477168684211	0.496251168463768	1.47533096686845	1.05785501596708e-05	5.16517972945914e-05
LINC00491	0.231238322631579	0.769636925193237	1.73479750514289	0.00611759923399328	0.0122948280235021
AP000695.2	0.137910335789474	0.979406626231884	2.82817737199297	1.43930556293755e-08	2.38998634685961e-07
ZNF772	0.625417142105263	1.26359646352657	1.01464513662605	0.000129437613220445	0.00044350583215033
AC096720.1	0.199494022631579	0.594963628913043	1.57645595670272	0.00571493321744733	0.0115810878020266
TSHZ3	6.26599794736842	1.79798898705314	-1.80116011294711	1.18664315370606e-07	1.22604545666227e-06
FAM71E1	0.791715982105263	1.80345205220531	1.18770618717697	0.000361200743168964	0.00107848656016538
AC245041.2	1.46789161773684	4.44211180109662	1.59750025350099	2.13452948455493e-05	9.44802470363391e-05
MIR210HG	1.70034506842105	5.02164592702899	1.56233275177098	3.29759588221736e-05	0.00013652425317309
CYP4A22-AS1	0.0782276068421053	0.325313241304348	2.05607981046395	9.2653979161243e-07	6.61265352226095e-06
C15orf48	5.91811120421053	30.809376617029	2.38016078098842	0.0001004937883397	0.000357114573980642
MRPL40P1	0.0255350605263158	0.400124094275362	3.96989612225776	5.63848041659012e-08	6.75142361560181e-07
EEF1A1P12	2.30634157368421	0.988158115120773	-1.22279238382172	9.87091789972572e-06	4.87517853520805e-05
ST8SIA1	0.78692847368421	0.236770559531401	-1.73274280588881	4.6847659597235e-09	1.05649355411409e-07
CAP2	9.69858721578947	2.57400411951691	-1.91376024406062	5.333522016458e-06	2.89646522705648e-05
ITM2A	24.0211696842105	6.43742096816425	-1.89975168266553	5.20952506669776e-11	6.34716356015910e-09
AC006058.3	0.0371860705263158	0.306053655869565	3.04095039082282	0.00447978917689195	0.00938420054996357
TNFAIP3	33.0966290526316	13.0560887780193	-1.3419615111895	0.000112797472546658	0.000394045611132553
KLHL35	0.135106359473684	0.637496207012077	2.23832117411804	1.21123828573183e-07	1.24188327623969e-06
MELTF	0.701755026315789	4.54492348214976	2.69521660838173	0.00111630938968444	0.00285669845589868
MCM7	20.4827292631579	46.5461862125604	1.18425500161448	9.90289305674803e-09	1.79351334385872e-07
HES2	1.78285518063158	6.65488732434058	1.90022472050384	0.0004179437493221	0.00122433701304146
AC116914.2	0.554448831578947	1.48544283736715	1.42176685898309	1.8541158498772e-06	1.18572187990907e-05
PDIA3	72.06022	145.874452681159	1.01745228153682	2.50520124788175e-09	6.70543381084241e-08
UGCG	36.9939084736842	15.3685528478261	-1.26730640923112	3.91389200115466e-05	0.000158438739196688
BORA	0.799604331578947	2.7328329705314	1.77303909319584	6.86250699225612e-10	2.96002801599314e-08
P2RY14	3.61805650526316	0.512424099939614	-2.81980470540972	7.90976251975732e-10	3.19163627088463e-08
RHEBL1	0.500561164736842	1.97886264057971	1.98305320239332	1.95267752309959e-08	2.97870637121281e-07
CDON	1.77518990526316	0.46710585926087	-1.9261519215129	2.1610220823013e-07	1.98858545023145e-06
CENPN	2.29825762631579	4.84937815917874	1.07725923295709	7.14402668039905e-06	3.71002968736029e-05
RPRM	3.16147202105263	1.54740095387923	-1.03074938345826	7.3503581654155e-05	0.000272558834501366
FBXW9	3.44340010526316	7.65463170772947	1.15249914172918	8.47984710800081e-09	1.61366502319898e-07
IL17RB	0.790273415789474	2.10702715169082	1.41478512230414	0.00166042983600535	0.0040178804504731
C11orf96	109.739053684211	13.8024641002415	-2.9910792862977	7.03895578862181e-11	7.4497911584367e-09
BCL2L12	4.94530873684211	13.8545067101449	1.48622284784663	8.29233348450225e-10	3.28246947615434e-08
RPL37P6	0.986390491052632	2.24622097826087	1.18726906674237	0.000650981929012881	0.00179887686805135
MT1F	2.05092706315789	4.60650026231884	1.16739490882856	0.00687973457818332	0.0136208145922184
AC120114.1	0.146704022105263	0.323827897198068	1.14231885146168	0.00239472391838979	0.0054942881502618
AC023024.1	0.0885917763157895	0.269990664603865	1.6076648349954	8.40605640958193e-05	0.000305901544633409
WDR34	14.9312704736842	41.9263644975845	1.48952081030395	3.20415483118368e-08	4.34389863421238e-07
AC068790.3	0.0830015447368421	0.316331269227053	1.93022608103255	2.78868181262861e-05	0.000118514239751643
AC020594.1	0.261245491578947	0.662477322318841	1.3424649293742	0.00123160884731794	0.00310748479600244
AC010319.4	0.185089051052632	0.549928604589372	1.57102477540031	4.6476302714227e-08	5.82169861422486e-07
HNRNPA1P33	0.0657422452631579	0.332090869927536	2.33668542577407	0.000773473836237585	0.00209206999990281
ACY1	0.987060431578947	2.37138662270531	1.26452057427121	1.24610818083316e-05	5.93720868384271e-05
AL365356.3	1.10319547578947	6.40807368130435	2.5382022907596	0.0147927120397931	0.0263760957904246
CPQ	18.5894162631579	7.25237758115942	-1.35795552477408	1.73055787006816e-07	1.66515165723533e-06
FAM180A	1.88174945263158	0.346593001968599	-2.44076012124787	3.08917639340808e-10	1.78345282060049e-08
PCNA	42.7350831578947	119.607789347826	1.48481851196147	9.6862364704049e-09	1.76449373683696e-07
CACYBP	10.0151728947368	21.0499806618358	1.07163158090493	3.04016117807111e-10	1.76057499303267e-08
RASL11B	1.41242507842105	3.40697849323672	1.27031849804174	0.0222313667018396	0.0375013156007027
TPM3P9	1.19569897894737	3.6681726826087	1.61720732458614	2.94126030812487e-08	4.08186887288069e-07
OCIAD2	13.5698214736842	33.057543531401	1.28457778297935	3.09727436018747e-07	2.70298413117198e-06
SLC9A3-AS1	1.98527594736842	4.14849075342995	1.06324701897478	0.00522857203327786	0.0107310979064092
PCGF1	3.3824971	7.3911528647343	1.12771071477198	3.7516606760186e-11	5.36014479242072e-09
AP1M2	21.6341836136842	47.8907506408937	1.146434368262	4.09442846711445e-06	2.31606154140695e-05
AC106028.3	0.180425648421053	0.594071156062802	1.71923130347512	1.3012658002116e-07	1.3219085116064e-06
FHL5	1.79056644736842	0.401857929731884	-2.15565860209251	5.80138890635426e-09	1.2341991650099e-07
C20orf96	3.35024557894737	7.17092295772947	1.09789196623612	3.94581021668512e-05	0.000159455604341294
CEP131	3.76469184210526	10.1166853043478	1.42613299019169	2.53411003344629e-09	6.76351444630907e-08
AL391994.1	0.0807534236842105	0.224783349202899	1.47693984024733	0.0280750224391961	0.0459020256210035
C1QTNF12	0.321890081052632	1.43777970299517	2.15920261618248	2.34997280790955e-05	0.000102493119002341
S100A11	942.8115	2012.05495297101	1.09362844720451	1.4047806966827e-05	6.59112283367279e-05
PIP4P2	5.23623294736842	2.43200850966184	-1.10638100391361	0.000566996177799448	0.00159402896075083
GINS2	2.32055857894737	7.41305797318841	1.67559667731106	6.56249812776448e-09	1.3442374713018e-07
MAMDC4	0.732190542105263	1.89652594628019	1.37306806599837	1.85852898289675e-05	8.37051831639264e-05
PTCH1	2.13246094210526	0.753875244033816	-1.50012161535218	3.91389200115466e-05	0.000158438739196688
CREM	8.87630284210526	3.69498470531401	-1.26439049768761	4.33367331424316e-07	3.56166063929673e-06
RAMP1	50.9102017368421	12.3216188298792	-2.04676297085278	5.5599198109491e-08	6.67866679979757e-07
SLC39A4	2.43557578947368	10.281917223913	2.07777452030353	1.07416268665934e-09	3.85363565770348e-08
AC009690.2	0.202920390526316	0.53659122352657	1.40290961601145	4.26374539719293e-06	2.39666431658271e-05
RNU6-481P	0.596862131578947	1.38537125966184	1.21480302090173	0.00433161830830918	0.00912372634921477
SMUG1	3.67031289473684	8.56855890096618	1.22314952747054	1.39253089338518e-10	1.1510157335941e-08
PPOX	2.80530715789474	5.92272373937198	1.07810205172811	6.71664344801818e-06	3.51532443556946e-05
TIMELESS	3.69320461052632	11.5881259855072	1.64970217680571	4.41516081984637e-10	2.22078992185618e-08
RECQL4	2.62131364210526	12.239275671256	2.2231562922435	9.37484445471656e-11	8.9176346494933e-09
SLC25A39	28.4913200526316	63.9704951449275	1.16688418427426	7.36801127464831e-10	3.09968599879431e-08
PLEK2	9.46630894157895	22.1019498188406	1.22329973717863	0.00297107083242817	0.00660656577729909
AC005256.1	0.04253011	0.504505158743961	3.56831253000312	0.0100054127885042	0.01881643381284
MS4A14	0.172565713684211	0.445295029601449	1.36761565814454	0.013506481627374	0.0243745421539308
HESX1	0.323722296842105	0.700995396135266	1.11464823252792	3.29759588221736e-05	0.00013652425317309
RAI2	12.8150625263158	2.22354146934783	-2.52690930122904	2.28278891993717e-11	4.60558801126679e-09
MIR548AA2	1.47813555789474	0.403542272125604	-1.87298687057037	9.36451352109168e-08	1.01564374101875e-06
AC116407.4	0.184633190526316	0.450655877415459	1.28736428441267	6.04028765555324e-06	3.20968583654824e-05
LINC00240	0.123384016842105	0.252415035555556	1.03264232964007	0.000247906104279683	0.000778617715868713
C7	44.5082675789474	3.43584941186715	-3.69533463521703	3.06174011521899e-11	4.93092745732827e-09
MTX1P1	1.43082214210526	2.86493525775362	1.00165818764874	0.000416466102584147	0.0012203894241428
SLC35A2	7.83911873684211	19.3242728381643	1.30165074460717	2.97460267248993e-09	7.56266530405536e-08
LINC02041	0.629977215789474	2.6383668357971	2.0662736122437	0.000453615195346405	0.00131304873654499
INHA	0.202188615263158	1.03158695830676	2.35109176920601	5.19019159953898e-05	0.000201546042531501
SNORA9B	0.180368232105263	0.507905262294686	1.49361415949262	0.000356587609514988	0.00106657951814598
SNORD1B	0.214469273684211	0.580908451207729	1.43753984641532	0.00266934463315742	0.00602924200697396
HLA-G	1.62666756315789	4.1883439805314	1.36446049070028	0.0121545608586665	0.0222754469028286
AC009087.1	0.0780039736842105	0.212760046811594	1.44760773465578	0.00155641776720985	0.00379870713280589
TLR2	1.88067231052632	4.51205583753623	1.26253642676104	0.00454540714121046	0.00950255979838795
FANK1	0.666113431578947	1.36413301388889	1.03414454756864	0.0001004937883397	0.000357114573980642
AC018752.1	0.869962204736842	0.283716643743961	-1.61650193855002	0.0018369963557285	0.00437649468666302
RNVU1-4	0.867178368421053	0.424777708961353	-1.02962070952861	0.00881410961150475	0.0168926597181475
MLLT10P1	0.139020032105263	0.411768197391304	1.5665396255883	0.0012744041963019	0.00319973851668842
SNORD14A	3.75119093157895	7.97043051256039	1.08730895514654	1.57590573363683e-05	7.27397768271288e-05
STC1	26.3976222631579	8.59063303454106	-1.61957163521925	0.000815257210891585	0.0021902449954122
CACNA2D1	4.34870588947368	1.06909276753382	-2.02419909581608	2.61008749393757e-06	1.57926706381008e-05
ISYNA1	14.6920806842105	37.7975134681159	1.36325260499351	0.000761808511949913	0.00206349258116302
LIPG	0.36564068	2.47398176782609	2.75833637429155	4.79139203332768e-06	2.6433663252375e-05
AC118344.2	0.131540315263158	0.306160187884058	1.21878165836924	0.00156715943147338	0.00381977298164913
SH3TC2	0.359108589473684	0.750498110256039	1.06342827810568	0.00141316411248435	0.00349297829568487
KNSTRN	2.14429027368421	6.4988568031401	1.59968574236749	1.9446571610294e-09	5.65699260657281e-08
TAC1	1.50656173526316	0.715311688908213	-1.0746158703936	8.06414320929947e-07	5.87492660766475e-06
MTMR4	3.86407878947368	8.28843707004831	1.10097557058951	2.29533323433497e-07	2.09166282058412e-06
RPSAP70	1.12757205263158	0.505796654299517	-1.15659022650456	3.44823603328028e-07	2.95430377591041e-06
PABPC1P4	1.52719515789474	0.49843428589372	-1.61540921784627	6.09406709208718e-06	3.2336815850914e-05
VAX2	0.275711038947368	1.30803024202899	2.24616696034697	0.00187416854030992	0.00444732697050453
ZIC2	0.300064833421053	1.78662374858213	2.57388968911336	7.04474453328959e-05	0.000262523419420283
AC006504.8	0.744464189473684	1.51109873210145	1.02132356785479	0.000721411841633428	0.00196684925027748
MYOM2	1.03957953684211	0.182523026256039	-2.50984975680726	1.83528936014217e-11	4.25130052646266e-09
THRA	11.1195926315789	4.15525590241546	-1.42009470205958	1.2749034592425e-07	1.29864351822839e-06
ATP11A	1.33686614210526	2.75639877149758	1.04392960123418	0.00071162881309111	0.00194413095807054
EBP	13.6190248947368	31.0113056690821	1.1871708571472	2.27240125415933e-07	2.07479633731346e-06
RNASE2	0.429819790526316	1.17824328475845	1.4548336423919	0.0165262932845948	0.0289962620112025
SCN1B	2.34364724210526	0.995347788497585	-1.23548281972931	1.23882455582258e-06	8.43704723807589e-06
SERTAD1	34.998083	14.804837826087	-1.24120721427218	0.000168623356666787	0.000558200430687884
AC099066.2	0.0469647205263158	0.293481243429952	2.64361897346973	0.00293588011447839	0.00653373485801898
AOC3	68.9734221052632	7.87009857826087	-3.13158693595465	1.32558756053224e-10	1.11533629588639e-08
LINC00115	0.361045683684211	0.841926637584541	1.22151313242718	2.66734442680245e-07	2.36966777841356e-06
SNORA26	1.39888246842105	4.65316816449275	1.73393857176235	6.54096320373697e-06	3.43679900844908e-05
AC127024.5	0.908584184210526	2.1017164147343	1.20987592149947	4.50718924584403e-07	3.67848594257379e-06
EPHA7	4.75057122631579	0.633857267041063	-2.90587108513008	4.18373904577241e-09	9.71599758159366e-08
ZFHX2-AS1	0.112995763684211	0.259379080847826	1.19879344396931	0.000107714520335874	0.000379610956441208
CNTN4	0.826515	0.208055970480676	-1.99006931320066	1.42185564568406e-09	4.63167113129763e-08
DUSP2	113.986836242105	20.4895436432367	-2.47590746736863	0.00416057940480861	0.00882388960918096
C20orf197	0.0411884324210526	0.387783571727053	3.23494056038693	0.00172451364615031	0.00415371298467259
MNS1	0.908788478947368	2.06004644777778	1.18066041567297	0.00082635603756543	0.00221498833326288
DIO1	0.0592594428421053	0.448043559384058	2.91852203256873	0.00216671832781733	0.00503090140601308
PAMR1	14.926786	2.30191435048309	-2.69699750139672	1.26179294692178e-10	1.07126792140694e-08
MIR559	0.148741842105263	0.596521224637681	2.00376292637954	0.00704243126110349	0.0138843267576006
TONSL	1.65753943157895	5.93035060241546	1.83907420810137	1.24631918121418e-10	1.06779391767679e-08
HCN2	0.109604219473684	0.31283023557971	1.5130766190128	0.00123219564474008	0.00310748479600244
TMEM139	1.18142770368421	5.4086153186401	2.19472794346656	0.00204782666935405	0.00479632836212014
MTND6P4	2.40132617894737	0.882169273091787	-1.44470396644707	4.10816179000226e-05	0.000165021279524325
ITGB6	11.8147710952632	25.6258280749517	1.11700694657419	0.00224997515204275	0.00519840952810961
ANKRD61	0.11969598	0.357206664903382	1.57738429903014	1.11420218003181e-05	5.39921888014898e-05
AC004241.3	0.666500308421053	1.36904634806763	1.03849384078318	1.56257709919323e-05	7.22489751408639e-05
LINC02195	0.348063037368421	1.40084557731884	2.00887740857477	0.00397564015490804	0.00849407153570252
MEOX1	4.20388655789474	0.910701897280193	-2.20667294380264	3.07824869755806e-09	7.74229066660204e-08
MAPT	1.50587540421053	0.305988568427536	-2.29905274598015	1.67938303373866e-05	7.68543021025329e-05
ALB	0.018568943	2.99899762650966	7.33544487511646	0.0280657782702486	0.04589091047361
PLXNA3	2.71894968421053	6.16229805652174	1.1804190103095	1.07073993223875e-07	1.13440391578745e-06
TSSK6	0.504237831578947	1.11307182137681	1.14237041730758	4.41960988811777e-07	3.61487098216015e-06
AC010186.3	0.94220772631579	1.9207127723913	1.02752472375495	0.000854719285531458	0.00227896801967127
AP001453.3	1.08792452105263	2.7515322589372	1.33865677536517	3.17008703342567e-08	4.30393220030144e-07
AL353708.3	0.142213877368421	0.669555422826087	2.23514122897325	2.1379815063193e-10	1.48573877789145e-08
AC004816.1	1.96274521473684	5.01418881246377	1.3531434150381	8.06882933304668e-07	5.87492660766475e-06
AL132780.5	0.0505409684210526	0.226449531328502	2.16366434021742	1.97376704776277e-08	3.00629248362667e-07
SMPD4P1	0.0182687978421053	0.263782642690821	3.85189602886839	0.00224534523186956	0.00519026889067002
FASN	15.8354877894737	49.7060988333333	1.6502615700816	1.01242444133445e-08	1.82655225907643e-07
HM13	11.8095081578947	24.0714506763285	1.02737420841088	1.36268540979112e-08	2.29310012053012e-07
AC109460.1	0.108386486315789	0.300514955966184	1.47125190054495	1.07073993223875e-07	1.13440391578745e-06
PLPPR4	4.67783422105263	0.406977443350242	-3.52281999384933	8.43914685642633e-06	4.25655141040665e-05
PRSS8	7.14173986842105	34.0209125852899	2.25207434962684	6.78421509394019e-07	5.11009025542173e-06
AC008403.3	0.0901905057894737	0.338216247246377	1.90689848927483	4.2919373056022e-05	0.000171595183603269
TNNI3	0.0186809681578947	1.032177456	5.7879779897076	1.56472912693629e-07	1.53712107898982e-06
SLC7A9	0.0913586310526316	0.244524448871981	1.4203657826485	0.0202318039919541	0.0345451469784874
TP73-AS1	2.89048632631579	1.19272754504831	-1.27704772198374	5.98388239064127e-08	7.06135756576114e-07
MAGI2-AS3	2.06134746315789	0.555257012826087	-1.89236009369499	2.47661375548593e-09	6.65740743469663e-08
ARHGAP40	1.74729198315789	5.70286424763043	1.70656597930284	0.000353498932581506	0.00105861034173556
DGCR5	0.0219382977368421	0.213218905101449	3.28081186880052	0.000226102567294196	0.000720877225172642
AC109322.1	0.562317578947368	1.60793143333333	1.51574883364901	3.48931812751106e-09	8.45866615329328e-08
DTX3L	8.377497	17.547904594686	1.06670759786526	1.04445585782883e-06	7.27976421264574e-06
C17orf107	1.36985128947368	0.660146279154589	-1.05316163728104	0.0055716433923229	0.0113433968066574
AC005180.1	23.4590336605263	0.847016681811594	-4.79160939254484	7.95213408298977e-10	3.2018431716553e-08
DDN-AS1	0.0438218321052632	0.270364758857488	2.62518540643385	1.26533404295999e-09	4.28546257185168e-08
TOR2A	2.39567815789474	4.96044894444444	1.05003659189179	7.68869534603292e-08	8.64367829704108e-07
FIRRE	0.0664666803157895	1.00780620618599	3.92244313533971	1.85624273262659e-09	5.46068658977326e-08
HIST1H2AC	8.84079378947368	27.6494551376812	1.64500323489145	1.15329836382174e-05	5.55567065478493e-05
AL354798.1	0.159061756842105	0.375410099492754	1.23888045214182	0.00425008068414885	0.00898122129481753
EXO5	1.51295532631579	3.05256603429952	1.0126531153872	7.76460447025655e-07	5.70651287408632e-06
AC022098.3	0.0975121078947368	0.272913781980676	1.48479197985465	0.000203129424876869	0.000657500711679159
AC005682.1	1.39027180526316	0.655181815410628	-1.08539974419175	1.07630545573435e-05	5.24026753020915e-05
AL590556.1	0.632592289473684	0.307488077729469	-1.04074549751854	5.18933620503309e-06	2.83374607727112e-05
AL161669.3	0.596033452105263	3.15553332821256	2.40441865230121	0.026487404551172	0.0436361056792805
MTURN	14.4602658421053	4.31142102826087	-1.74585871579363	4.84603225078237e-09	1.08245360858845e-07
PLAC1	0.418607092105263	1.24943842577778	1.57761114570195	0.0190514598262983	0.032795642842356
NUP210	3.53801734210526	12.5426730351208	1.82583181650924	1.97128839777408e-05	8.81279109064452e-05
PPP1R12A	16.5622314210526	5.3716285531401	-1.62446560820269	0.000119013346908581	0.000412839236096451
CD55	91.06756	26.1678824082126	-1.79914004863287	0.00118456865733451	0.00300433383584312
SNORA79B	0.101210942105263	3.18069155169082	4.97390329692039	0.0103223565481161	0.0193388293472094
EPHX4	0.494063599473684	1.1466508823913	1.21465753174244	0.0055716433923229	0.0113433968066574
CORT	0.152432614736842	0.367284502318841	1.26872640509882	3.9138894238788e-05	0.000158438739196688
AC007785.1	0.112854005263158	1.78860851118357	3.9863081195656	1.75990637230053e-05	8.01094693437041e-05
AC012360.3	0.317798568421053	0.708898795410628	1.15746705271927	1.36138524571543e-06	9.14887942885337e-06
HIST1H1E	0.244417478421053	6.96948790082126	4.83363329281515	4.00736679810893e-08	5.17972963535692e-07
INCENP	3.16273269473684	7.77146547657005	1.29701504690846	1.35558163580625e-07	1.36672639616511e-06
KIAA0895	0.50183137368421	1.01753827328502	1.01980848684165	0.0105201600336111	0.0196466370768035
AL136531.2	0.960766340526316	0.260918176487923	-1.88058815764971	0.00586720269048483	0.0118450874233778
AL157871.5	0.06444311	0.210643485942029	1.70870527712318	0.000466668958603046	0.00134543787189136
RF00569	1.09762698684211	2.89497297379227	1.39916202197575	0.0010342530559858	0.002684793869599
ITPKB	19.6797888947368	5.47362148067633	-1.84614716890455	4.05012802603326e-08	5.22285581803863e-07
DES	2904.36235263158	172.284555998082	-4.0753561715551	6.62260604683105e-10	2.89650250015597e-08
SMIM22	13.17654917	32.1622220547343	1.28739449444069	0.0018802845165651	0.00446014897399633
AC020928.1	0.0462390136842105	0.235819290096618	2.35049920666023	0.0174625868093734	0.0303942965031793
C18orf54	0.577113394736842	1.44918640869565	1.32831645924307	1.71310493640757e-07	1.65514870864136e-06
CREBRF	2.92668987894737	1.45831959975845	-1.00496295159031	3.37961340628635e-05	0.000139396980308091
AC004982.2	0.590631468947368	1.37670951826087	1.22089405641347	0.00187432892446257	0.00444732697050453
ARHGEF15	3.51601579473684	1.69841467560386	-1.04975280900763	5.38125921054003e-06	2.91732350671374e-05
PNRC1	56.1506084210526	24.1859115845411	-1.21513474003134	2.91332704181118e-06	1.73477484244694e-05
SAP25	0.122584149473684	0.273629131135266	1.15844938480035	0.000407667724813333	0.00119863577341536
AC048382.5	0.689884994736842	0.248807747753623	-1.47132447067346	9.22562522900852e-07	6.58777812447208e-06
AC131212.3	0.229140948947368	0.626004221859903	1.44993708645049	4.4198610213048e-06	2.46521558688294e-05
AC073210.1	0.0775112752631579	0.30894030647343	1.99485001315452	5.11261210643473e-05	0.000198979342362653
LRRC26	0.0559011852631579	0.208594567888889	1.89975081071519	0.00480679191772678	0.00998558865725283
LINC00680	0.899977057894737	2.10103989251208	1.22314342475031	4.55068773310987e-08	5.72282533085392e-07
MITF	3.38561171578947	1.00637319504831	-1.75025112359822	8.46545773111474e-07	6.12562219085638e-06
UQCC3	6.26336231578947	13.5923023961353	1.11778061266208	3.77821724600423e-09	8.9508447205527e-08
SLIT2	4.27098009473684	0.733172249099034	-2.54234308882917	7.11086818719708e-10	3.0323004499177e-08
CXCR1	0.793448008421053	0.274152576816425	-1.53315665804615	0.000283920115354795	0.00087474435540263
CMPK2	1.40915511578947	4.75883505676329	1.75577802278656	4.82887834719545e-05	0.000189429739553477
ERO1A	10.1625131052632	21.7320318937198	1.09656585665223	3.00625751175099e-07	2.62721982733972e-06
CAPN12	0.307648787894737	0.837314875458937	1.44448594731855	0.000164252371677113	0.000546139863508359
ATP6V0D2	0.0322557455263158	0.304237202978261	3.23756851332038	3.34623108180483e-05	0.000138232791254742
ASB2	10.5360747	1.15737156400966	-3.18641347081	2.56592216573582e-10	1.62102348807075e-08
AC015712.2	1.14032461052632	0.428916546347826	-1.41067569054405	0.00996634684022172	0.0187486029439623
Z84484.1	0.182392135263158	0.539679987801932	1.56506066893146	0.000152638057689866	0.00051242581435587
EIF4EBP1	23.2291466315789	74.5075596400966	1.68145065595785	1.25067674245338e-09	4.24348060011804e-08
SKP2	3.49615747368421	13.6387611014493	1.96387052763045	9.49198968738269e-11	8.94965841730459e-09
MSH5	0.158389157368421	0.510512596835749	1.68847298168421	1.21123828573183e-07	1.24188327623969e-06
PDX1	0.0388436544736842	0.505659303108696	3.70241482762679	0.000344774697382092	0.00103669994342631
AGAP12P	0.0926881394736842	0.290421605490338	1.64769213836165	0.011156847631462	0.0206845659577962
PBK	1.99763036421053	7.2726840615942	1.86419824873216	2.01391399008945e-07	1.88464180528919e-06
FRAS1	0.314648978947368	1.0539186130314	1.74394829533964	0.00943865429584288	0.0179031005411342
AC106782.2	1.6883726	3.52459411062802	1.06182380588508	0.00026283868518215	0.000819073617351383
AC010542.5	1.08515041052632	2.78101775048309	1.35771792744415	3.03630566825941e-07	2.65224409932734e-06
PSORS1C3	0.899820589473684	4.14203954355072	2.20263204305849	0.00517043679941052	0.0106268929419805
MTBP	0.294452478421053	1.05950613342995	1.84728521750194	2.69350184677283e-10	1.65157435133982e-08
NMB	5.77188605263158	17.3399967485507	1.58698890419899	3.15942427137068e-07	2.74445729646889e-06
SLC24A3	10.0748692631579	2.36268367277778	-2.09226272515544	2.19072885659946e-10	1.49471438314093e-08
HAS1	7.48035482631579	1.08172983258454	-2.78976648126462	7.12492501347839e-08	8.1415936679595e-07
WDR97	0.0922019144210526	0.271151174826087	1.55622880991435	7.79992747789009e-06	3.98774257017229e-05
ANK2	2.2262096	0.33800915850942	-2.71945518772861	7.6819081911972e-11	7.74922813932436e-09
HIST1H3F	0.0501706284210526	2.47957250809179	5.62710459433648	3.35740639532764e-06	1.95272833836121e-05
CENPI	0.427972491736842	1.88802663371981	2.14128914205013	1.75240861748805e-09	5.23573931368285e-08
FAT4	1.52987312631579	0.3482118197343	-2.13537493404051	3.35318322926201e-07	2.88339949269675e-06
AC020661.1	0.235497608421053	0.662084315193237	1.49130254450687	1.36138524571543e-06	9.14887942885337e-06
PGAM1P8	0.318061873684211	0.671859723019324	1.07885260015642	0.000889946212285888	0.00235781711114376
AL360181.4	0.107775121052632	0.289769695700483	1.42688254186935	0.0270097333720699	0.04437685002278
KANK2	55.3858345789474	9.68088893478261	-2.5163056090778	2.53069475467527e-08	3.63300885095425e-07
SRMS	1.6220059	3.4006080181401	1.06801365148691	0.00621233587590869	0.0124638795261161
HRAT92	0.0667999044736842	0.214666269582126	1.68417757425179	0.00124029244680791	0.00312541111224847
IGIP	5.44125315789474	2.65703687463768	-1.03412070245719	1.7519304038512e-05	7.97657611440429e-05
AC008731.1	0.0928707284210526	0.250069126908213	1.42903110024652	0.0149263944150733	0.0265816190594173
DNAJB13	0.0718031907894737	0.471431446016908	2.71492813321481	0.00105860683577591	0.00273389920316104
AL513329.1	0.143777850526316	0.611647581062802	2.08885919991548	3.27975920029662e-06	1.91180478714087e-05
HSPB7	29.8995335263158	2.75583857421739	-3.43955968814083	3.27335913909348e-08	4.41856385084971e-07
AP001992.1	0.435574808421053	1.44178300862319	1.72686162932816	5.48912032455772e-05	0.000211439878155772
HSBP1L1	3.78413943684211	8.72429094154589	1.20507263276505	8.88074542111693e-07	6.38182406497193e-06
TCEAL2	6.43519436842105	0.89969545929227	-2.83847507735701	9.4104975782107e-11	8.9176346494933e-09
AC073195.1	0.187842491052632	0.839169546062802	2.15943887681679	6.48921132956878e-11	7.29084264531132e-09
RGS19	5.25325015789474	11.6941660096618	1.15450678512187	2.74843729560046e-07	2.4313497867681e-06
AL359091.5	0.620562247368421	1.51142016246377	1.28425693709423	0.000414992926817084	0.00121835585759176
PLA2G7	1.76141277894737	4.40446307512077	1.32223312080809	0.00107997749527389	0.00277850236443494
MIR6745	0.0340646789473684	0.214542207173913	2.65491298412518	0.00209107214577686	0.00488298527333058
TACC3	4.27456724736842	17.051313826087	1.99603262948079	9.89434030228572e-10	3.63302362214847e-08
TAGLN	743.642698421053	94.8292032318841	-2.97120628978868	5.42355725614813e-09	1.17916807412639e-07
MIR205HG	13.962976153	30.5260724425773	1.12843550184236	0.00665041644611962	0.0132394845112122
RBL1	1.33108696842105	3.43310222995169	1.3669079832824	9.79398245437356e-09	1.77893991085587e-07
HIST1H4A	0.0217148926315789	0.949404494130435	5.45026615439536	0.000277786530230142	0.000859233212447767
MND1	1.24917641052632	3.58048292826087	1.51917695754391	1.89556622522699e-07	1.79176368181028e-06
CHRNA5	0.649254126315789	1.62893137176328	1.32707064014697	4.68739743691749e-07	3.79420354222963e-06
ABCB1	1.56897899473684	0.448040520951691	-1.80812491667013	7.93233981434243e-08	8.86447242028035e-07
FNDC10	3.26416457368421	10.3158552690821	1.66007773493299	1.14340333683153e-05	5.51083401206524e-05
AC073283.1	0.0749073368421053	0.284312050338164	1.92429631147207	0.0156343758328231	0.0276482369228332
AL158835.2	0.181282401052632	0.373613973478261	1.04330953943742	0.0167813927353366	0.0293729751201337
UCN	0.599979878947368	1.24509092345411	1.0532650756267	0.0100205350303356	0.0188316605342735
FAM72A	0.103599160684211	0.49371388326087	2.2526628993335	2.62895628333422e-10	1.63334790543709e-08
PYGB	110.040738421053	40.1319521062802	-1.45521448711601	0.00389742692343976	0.00834978549491895
FANCD2	1.12826916842105	4.02331246038647	1.83427249654384	2.69350184677283e-10	1.65157435133982e-08
EME1	0.291347903157895	1.99142035845411	2.77298295141211	1.24573535937573e-11	3.59595885353336e-09
BAG2	11.4663471578947	2.29072869591787	-2.32352735693409	4.82709398753879e-07	3.88715727417126e-06
NR4A2	32.5401077894737	4.7325093794686	-2.78154175960718	1.69492887873292e-10	1.29814601488209e-08
AC132192.2	0.523033107368421	1.13832634434783	1.12194004476145	2.63985412238256e-05	0.000113266825744944
KLK6	6.49708595157895	13.8709262902923	1.09419943679842	0.00737275315273234	0.0144777569235706
TIPARP	31.2489467894737	8.73483126328502	-1.83895582718789	1.61197349521389e-06	1.05750872825881e-05
PDE7B	3.3734365	1.11962882256039	-1.59119847372914	3.06997864435881e-08	4.21067319474447e-07
ZNF707	1.30783623157895	2.7664105678744	1.08083338871106	3.56959052001649e-09	8.60876952790095e-08
RNA5SP203	0.120956761052632	0.332990276666667	1.46098863804961	0.0207013153654942	0.0352627126829567
TSC22D3	51.0951021052632	21.3941719082126	-1.25596716486949	1.64090088058964e-08	2.61138449724372e-07
PPARGC1B	1.85315146315789	0.848089995630435	-1.12769153104933	1.08571382279538e-05	5.27889309590819e-05
LINC02550	1.01401026315789	0.491739453405797	-1.04410623873353	1.69189295147107e-05	7.73943822888178e-05
CLEC7A	1.24302205684211	3.11338258693237	1.32463097621439	0.0290156243005757	0.0472054243259951
AC046143.2	0.981036378947368	2.13178357512077	1.11968243813124	2.07265935407771e-06	1.29977744534784e-05
CCL23	1.66233184736842	0.649966800338164	-1.35477047895298	1.80858073194916e-06	1.16173913980014e-05
AQP9	0.583648521052632	1.58749560981884	1.44358087174726	0.0194385244079401	0.0333844424225336
CARD9	0.424847503684211	1.57088106871981	1.88655696539186	1.67938303373866e-05	7.68543021025329e-05
AL035420.3	0.0698219568421053	0.347739764299517	2.31625535395688	2.71099677049177e-05	0.000115789739141218
ZNF738	1.09115326315789	3.3983931671256	1.63899901401098	3.52336587573077e-07	3.00085855317006e-06
AC010422.2	0.138256853157895	0.495203919806763	1.84067174012812	2.93993042799414e-06	1.74903345149507e-05
SLC25A5P5	0.116843895789474	0.636358912801932	2.44525832334153	4.42659118989425e-06	2.46823567595797e-05
AL596094.1	0.618944905263158	1.39929450649758	1.17681673510573	2.12864775073573e-07	1.96844838575922e-06
TMEM119	17.3362321578947	5.80880433434783	-1.57747723892158	3.85078926214028e-05	0.000156288900985373
SYT12	0.311519222105263	0.966327396492754	1.63319087746374	0.0154616464512647	0.0273840732834698
AC117503.2	0.103201164210526	0.279790455917874	1.43888750492815	0.00162024581030053	0.0039317992936716
SNHG10	1.41164613684211	3.45946187898551	1.2931691557688	9.07732768913853e-08	9.90796389943608e-07
CELSR3	0.296189564210526	2.04072050862319	2.78448589295351	1.34783258423814e-08	2.27422506996944e-07
PDIA4	38.3543347368421	108.810667007246	1.50435845204805	1.86931027855588e-10	1.38086097466709e-08
AL513218.1	0.196873452105263	0.848787038405797	2.10813404489869	3.69297031079559e-09	8.79427502217539e-08
AL589182.1	0.218934155789474	0.916238324202899	2.06522586274339	0.0020103939925021	0.00472398528256943
MIEN1	13.9819432105263	38.69451902657	1.46856434660014	6.78460554390313e-08	7.83381869663104e-07
PDZK1	0.0531513710526316	0.539355417997585	3.34305746429509	4.37643383871929e-07	3.59051632668105e-06
XCL1	0.619883181578947	2.05601084531401	1.72977960766201	0.00134142304172967	0.00334318387476738
AC093001.1	0.124506284210526	5.85225592050725	5.55470239379765	0.0223549362214131	0.037682658190852
HSD17B7	1.47019845789474	3.12460497898551	1.08766289839898	1.81993317852808e-06	1.16583838268086e-05
KNL1	0.526790571052632	2.07075552850242	1.97485581200835	1.80977672728226e-08	2.81565843565481e-07
BNC2	2.094782	0.466144419538647	-2.16795121227095	9.77094866672259e-07	6.89997402460354e-06
CGREF1	0.380709793157895	2.41238626671981	2.66369734079058	0.000866315307283809	0.00230432011774399
PSRC1	1.44494841578947	5.05418843599034	1.80646146360002	1.65374237384449e-09	5.07012551641245e-08
DIRAS3	1.66827217368421	0.667849839879227	-1.3207590123527	2.45024707505168e-08	3.54737965356119e-07
ADRB2	2.85848200526316	1.3648157321256	-1.0665430265368	1.50391796873674e-05	6.99157900084427e-05
NAA40	2.67765710526316	6.83969943478261	1.35296170419063	2.34199311900122e-11	4.62555967282315e-09
NPAS4	0.699759578947368	0.273269858574879	-1.35653299021713	1.2575914205265e-12	1.81509137102606e-09
NFATC1	3.5367176	1.33790850724638	-1.40243156647222	6.78422151375341e-07	5.11009025542173e-06
MHENCR	3.92998759473684	7.86601649492754	1.00110845306578	9.49524175052477e-07	6.73824587613829e-06
TIGD2	2.09602060526316	4.63399438309179	1.14460339591195	1.76976891913396e-06	1.14071364581623e-05
SNRPF	11.3457995263158	25.221854326087	1.15251606961953	8.67023231888659e-09	1.63661538228641e-07
AC116348.1	0.107254301578947	0.501080502487923	2.22400689212052	0.00402762521008407	0.00859241976313899
AL162424.1	7.08908935263158	0.625131909589372	-3.50336776297521	1.63883929398057e-08	2.61138449724372e-07
AHNAK	99.4443942105263	41.9571698550725	-1.2449726802356	5.21952959496572e-07	4.13398200887893e-06
C8orf88	7.86069978947368	1.55848230190821	-2.33451598057345	7.39961133475009e-07	5.50274905041746e-06
BX322562.1	1.67941634210526	0.754434361690821	-1.1544926393872	2.25215185413094e-06	1.39534922774034e-05
NECAB1	2.97795417368421	0.424228184120773	-2.81140917676209	2.34684158240066e-08	3.43477290254162e-07
LINC00702	2.55154172947368	0.294451238978261	-3.11526858747639	5.40213963443775e-05	0.00020834616733066
B3GALT2	0.684248431578947	0.179440906642512	-1.93101140776501	1.64735995912607e-11	3.9826317034198e-09
POLA2	2.41052363157895	5.57219676086957	1.2088996288392	2.74576715821886e-09	7.13557190992527e-08
GTF2IP20	1.27676235263158	3.23307580033816	1.34041731509421	2.01581779102604e-06	1.27220952616958e-05
SLAMF9	0.115517521578947	0.557762114951691	2.27153825033372	0.00503019989363063	0.0103830187683379
AC009237.14	1.03800683684211	2.69049972442029	1.37405821296985	3.49198548076941e-05	0.0001433701690307
MIR6753	0.193989722105263	0.628983329251208	1.69704156194176	3.01455309603805e-05	0.000126622027626958
KLK4	0.0601038351578947	0.74676202420773	3.63511960697165	0.00109314580547673	0.00280814550221247
MYOC	10.2895283731579	0.266251767654589	-5.27224194323826	3.88619858349377e-11	5.44154806135027e-09
AL138831.1	0.105804682631579	0.241065680434783	1.18802279610661	0.00924768362875079	0.01759066179301
TUB	2.79904126842105	0.788485558937198	-1.82777652032911	1.03815882628904e-07	1.10802019942616e-06
FOXA3	0.140621948052632	0.496328584007246	1.8194737575668	0.00335410492483156	0.00732928385273165
KCP	0.310090842631579	1.01086439429469	1.70482664807077	0.000244299316830581	0.000769350131200435
CTHRC1	9.7605585368421	31.6397362007246	1.69670195941225	0.0200311693003477	0.0342486631658852
LINC01605	0.358196497368421	1.63808288446135	2.19318522188102	0.00120813701891136	0.00305715535889588
NRG2	1.38667256842105	0.415638381173913	-1.73822637997343	8.38617434651282e-09	1.60071198090253e-07
AL390719.2	3.16605669473684	8.51770503971015	1.42777768143193	0.00190407357871106	0.00450746058003477
WISP1	0.649139635789474	3.21333125492754	2.30746895915565	0.022341187322368	0.0376628659235931
AURKA	2.13532160526316	12.3556573442029	2.53264648814989	5.01647685459426e-11	6.31236465173365e-09
THBS1	197.003134736842	38.1942227628019	-2.36679224758097	2.72873145482037e-05	0.000116388243434405
PSMG3	10.3304081578947	29.2333438309179	1.50071760332082	1.73697241042286e-10	1.30886800549254e-08
SNORA55	0.670139515789474	1.44510870869565	1.10864463849952	0.0194064734806291	0.033344657684711
SNTA1	20.6540862631579	10.260423557971	-1.00933694906627	0.000299575225316652	0.000916207001241457
CST1	0.169957404210526	40.6623869238647	7.90237788072761	2.15220978041768e-09	6.0724679864627e-08
AC009005.1	0.389838531052632	2.44161590533816	2.64688766885813	1.58207456186354e-06	1.04265771001916e-05
RN7SL521P	0.196333685789474	0.641195302826087	1.70745613360111	2.24754193133184e-06	1.39407038868031e-05
KCNE4	14.3569477578947	1.6322811	-3.1367876346778	1.44043291747007e-06	9.63180428741658e-06
AC244153.1	5.52360198736842	11.6482456117874	1.07643140866739	0.00831840727330999	0.0160673538881115
MANEAL	2.25849680526316	6.73074053091787	1.57540236903307	5.35914567864254e-05	0.000207113594991493
NFIB	9.05058652631579	3.78685303478261	-1.2570118572794	1.85763251239948e-07	1.76569193668447e-06
MMP15	8.02345584210526	16.4761276855072	1.0380815423335	0.000126512358246059	0.000435311090733689
SLC22A3	3.50647542105263	1.37636691305314	-1.34915649917544	1.1744834452471e-07	1.21687794066141e-06
FOXP4-AS1	0.0500010989473684	0.433475073864734	3.11591732790916	1.84125719036661e-07	1.75457128810811e-06
UBE2S	7.12969215789474	20.1362938405797	1.49788648321774	6.13620799554046e-09	1.28497400245899e-07
AC105339.5	0.110387893157895	0.235519827801932	1.09326656913403	0.0215414650836774	0.0365115184611598
SMTNL1	0.110316994736842	0.50237327647343	2.18710466223703	0.000121759466011811	0.000421328371688923
AC022784.1	0.0401655026315789	0.477816092826087	3.57242660887813	0.00248160303804729	0.00566176043322973
CLDN5	20.1226856842105	3.82694697495169	-2.39455705130145	1.85680224072661e-09	5.46068658977326e-08
AL355338.1	4.40516648421053	10.2277005910628	1.21521338341848	1.5969595953608e-06	1.04951848993887e-05
SLC38A1	10.6459897368421	21.5749034731884	1.01904402419343	4.38032646851708e-06	2.45044918094174e-05
ZNF682	0.703356957894737	1.86988185874396	1.41061816519119	0.00024251443857336	0.00076475603545411
LMO7-AS1	0.316555265789474	1.18385777753623	1.9029664739456	1.34601802601711e-05	6.34556652167101e-05
AL122035.1	2.31280635789474	0.986945572439614	-1.22860204890219	3.38657215818452e-07	2.90545283054486e-06
RTN4RL2	0.241805058947368	0.707879822028985	1.5496600239031	0.00421012214347633	0.00890681269343177
MIRLET7A1	0.663509715789474	0.263690966884058	-1.33126944072889	0.0258895709170753	0.0427836902516368
RAD54B	0.304857244736842	0.960117832487923	1.65507764337032	2.65302883119756e-09	6.94264713525242e-08
HAGHL	0.462226295789474	1.05509751091787	1.1907050959888	2.61457164645229e-07	2.32719202098597e-06
SFXN2	0.830263857894737	1.7133685589372	1.0451937167611	3.63744981491998e-05	0.000148594537072379
CMAHP	2.48633083684211	1.16642010545894	-1.09193078487797	9.05229469150728e-07	6.48275592735691e-06
GTSE1	0.826956234210526	4.98361988333333	2.59131115017101	5.83331385909208e-11	6.84065424613404e-09
TFAP4	1.10437557894737	2.69435967342995	1.28671155973246	2.50520124788175e-09	6.70543381084241e-08
MIR1-1HG-AS1	2.33956965684211	0.151664296772947	-3.94728977676594	9.92628973969771e-11	9.22014724682912e-09
AC116348.2	0.0883090773684211	0.366098541014493	2.05159837767578	0.00227373688054291	0.00525007692464024
TRAPPC12-AS1	0.574305021052632	1.17482636850242	1.03255847171228	0.00472194589552454	0.00982455875335185
PUSL1	4.93233097368421	10.0524254347826	1.02720211767898	1.92439153614078e-06	1.22314899703962e-05
NEURL1	3.27573434736842	1.03154783886715	-1.66700763437771	0.000272595459889821	0.000844987380458072
USP2	2.12458324736842	0.626938161451691	-1.76078481998312	6.78630957796403e-09	1.37507048176392e-07
AC114489.1	0.102851876315789	0.535053236207729	2.37911432949228	3.3104281765117e-05	0.000137025289821066
NCAPG2	1.82340878421053	5.52160123671498	1.59844867117186	1.82955104741626e-08	2.8323322031907e-07
AP000577.1	0.0865515157894737	0.296300692705314	1.77543100804457	0.00382494579625798	0.00821513942023678
NUDT10	0.928411552631579	0.317386782236715	-1.54852242735822	3.90288307015883e-09	9.22289610143452e-08
FXYD6	23.5517217894737	2.77436845908213	-3.08560122708253	1.00112641189971e-09	3.65450094678488e-08
RNF139-AS1	0.142863537894737	0.388395177874396	1.442887535061	5.38726859922077e-08	6.53824842995985e-07
AC132812.1	5.23354161052632	12.0674227461353	1.2052581169865	0.000496658755242308	0.00142141675177111
BCO2	0.734599236842105	0.257488437741546	-1.51244974630296	2.06139556625061e-08	3.10916117440194e-07
MAGOH2P	0.534021458947368	0.199806497463768	-1.41829421729588	4.29121930416395e-06	2.41138507948572e-05
HRC	1.04250376842105	0.496212086830918	-1.07102381648501	3.73858962600657e-07	3.15553012210564e-06
EFCC1	2.67191283157895	0.936816106425121	-1.51203515710142	1.73706717603783e-06	1.12272102735094e-05
RNU6-323P	0.104670584210526	0.317924335507246	1.60282739606852	0.0100348092682322	0.0188565975262735
SLC12A8	0.835507764210526	3.9365172357971	2.23619465484472	6.34587228885364e-09	1.31421193990906e-07
AL365356.5	0.169453840526316	4.58864989623188	4.75910549677661	2.30145849151566e-07	2.09622648914118e-06
ADM2	0.288973127368421	1.49382455927536	2.37000347943651	7.54366522758952e-07	5.57690270548708e-06
CDC25C	0.541221080526316	2.75027970922705	2.34528841281626	3.86909473855237e-10	2.0507295078943e-08
ADAMTSL3	3.07635696421053	0.20325239321256	-3.91987867107572	7.03856008245171e-11	7.4497911584367e-09
RANBP17	0.138223631578947	0.372813182432367	1.43144858464971	0.00156715943147338	0.00381977298164913
RNU6-50P	0.168723263157895	0.486590178743961	1.52804829878752	0.00462448976262119	0.00965519552170074
AC008870.2	0.338098934210526	1.01822643538647	1.59054105317829	2.11796374418896e-07	1.95953420770303e-06
PPIAP39	0.895905943157895	0.268298706594203	-1.73950717892456	3.30569617970925e-06	1.92563729959282e-05
SNORA2C	0.146850310526316	1.6110164507971	3.45555300464426	3.61415052685624e-05	0.000147835854230224
AC010319.1	0.123950192631579	0.322581550939614	1.37990341681849	0.00639073506531877	0.0127876039277569
NAP1L3	2.21085115263158	0.665996874603865	-1.73101458566319	3.10300243251199e-08	4.2435593761824e-07
SNORD7	0.354653515789474	1.38150280942029	1.96175634135774	7.40230165925154e-07	5.50274905041746e-06
CSRP1	217.606429473684	26.2747482922705	-3.04997233498991	1.50703145915255e-09	4.75234138959316e-08
TSTD1	23.9354696578947	52.5298532144928	1.13398743847576	0.000111934901243256	0.000391615616637556
EPYC	0.0171457805263158	0.968736007381643	5.82017808024745	0.00510925131303921	0.0105195744964945
GHET1	0.177896532105263	0.407231469589372	1.19481066558909	2.70624910889035e-05	0.00011561327875708
AC009686.2	0.237869296842105	0.508404418140097	1.09580750088159	0.000916971184593045	0.00242155247523143
AL359881.1	0.141253044736842	0.707928369541063	2.3253214257547	0.00488478703814149	0.0101319101477613
AC079313.2	4.03251884157895	0.276973824444444	-3.86385972907562	4.69747604548926e-07	3.80072199402824e-06
PLIN1	2.14542679473684	0.865076867316425	-1.31036443920619	1.02191778308747e-05	5.02076489798672e-05
BLOC1S3	3.81121512105263	9.15062764975845	1.26361966029746	7.63420619705808e-10	3.14412731821732e-08
ACTA2-AS1	3.82493767894737	0.598152214678744	-2.6768516758387	1.62310804532963e-08	2.59186495481032e-07
EGR3	21.9724664736842	1.94095404981401	-3.50085895641657	8.99836675198472e-12	3.18559161070735e-09
AL449212.1	0.484977259473684	1.20191693299517	1.30934818561005	4.52764666068854e-05	0.000179226446583186
RF02250	0.126642688947368	0.54917658178744	2.11650631379512	0.0199569836144052	0.034143602038578
MPV17L	1.66723064736842	0.784300277983092	-1.08797568600989	7.69027440304714e-07	5.65853406370092e-06
PABPC1P3	0.639678429473684	1.29094853937198	1.01301275191109	0.000393474356132606	0.00116172452307098
AC122688.3	0.180068587368421	0.502318616545894	1.48005621633783	2.56258791128287e-06	1.55353269723426e-05
HSD17B3	0.165676918947368	0.715924817536232	2.11143546211383	0.0137921595610043	0.0248139407882804
CCDC114	0.0727377331578947	0.329995050804348	2.18166851680177	1.88216055603469e-05	8.46881978726113e-05
KCNMB2-AS1	0.633301446315789	2.28773176952174	1.85295363055883	1.04791139246423e-05	5.12869829512956e-05
AC004461.1	0.0854102821052632	0.211228493671498	1.30632279613664	0.00195158371588552	0.00460598305171824
NAT14	4.68286168421053	11.353929352657	1.27772933841925	2.99426122203293e-06	1.77452063515489e-05
RNF180	1.88870638421053	0.376944899118357	-2.32497288530696	4.09034333535667e-09	9.54567322963749e-08
AC025178.1	0.164228392105263	0.466860420289855	1.50728771985297	9.40498061314076e-07	6.67674244196282e-06
MASTL	3.07562694736842	6.69333260845411	1.12184418239831	7.45230556657089e-08	8.43351081698248e-07
RNU6-548P	0.0659404842105263	0.216017445700483	1.71191144394554	0.0224569271375265	0.0378307886408161
EEF1A1P24	0.453616596315789	0.214332387294686	-1.08162355568226	4.38372504182358e-05	0.00017478714263762
NES	18.6009641578947	8.89247542439614	-1.06472041626357	1.34862295818607e-06	9.07937300482427e-06
CDC42BPA	8.45701636842105	3.4040974115942	-1.31287644919399	2.17989881986545e-05	9.60127736082992e-05
TESMIN	0.253738980789474	1.11035690577295	2.12960640510946	2.61457164645229e-07	2.32719202098597e-06
AP001469.2	0.163956580526316	0.355344914299517	1.11590624498591	0.0132993472499282	0.0240678677131947
GPR158	0.0654575110526316	0.401653444103865	2.61732059570933	0.00319439210831206	0.0070361284990187
ARID5A	26.9495611578947	7.82033031884058	-1.78496032939328	2.07266115039212e-06	1.29977744534784e-05
MFAP2	4.70968879473684	18.9140185951691	2.00575228203589	2.29192546134658e-05	0.000100266838532633
PCSK4	0.373800252631579	0.936411529347826	1.32487515328062	0.000990571001214865	0.00258642968213116
AP003071.4	3.19255992105263	0.528247319299517	-2.59542825204161	7.02393316092744e-11	7.4497911584367e-09
HOXC13	0.287473182105263	2.0304423128913	2.8202947584574	1.84590883027401e-05	8.32366916184361e-05
AC156455.1	1.15852682631579	0.558964491516908	-1.05146290776543	5.85043885006462e-05	0.000223027963262316
ANKRD13B	2.08937277368421	4.42168073285024	1.08152494662925	0.00150768553963356	0.00369593725896845
AC024361.3	0.116201022105263	0.450389769275362	1.95455129782766	2.09239906349122e-05	9.27248078136178e-05
NSUN5P1	1.54080414210526	3.78854304275362	1.29795965220735	1.83894188318379e-07	1.75325541433828e-06
TNFAIP2	48.374248368421	121.699739869565	1.33101493415526	0.00195931587203906	0.00462016384404535
PI16	96.4248462105263	2.30067036907729	-5.3892787400199	1.1404188283022e-12	1.81509137102606e-09
AL033527.2	0.131567259473684	0.796907254710145	2.59861131199748	0.000341526299564986	0.00102825063522751
AC093249.6	0.559689510526316	1.20215452077295	1.10292373229059	8.47188181490324e-05	0.000308057981575639
POU6F2-AS2	0.158860466315789	0.779332893115942	2.29447956583463	0.0156622478490092	0.0276896972006935
AL031985.3	0.532564505263158	1.61532501062802	1.60079628772737	1.4082042544526e-08	2.34238798105444e-07
CRYGS	0.444832306315789	1.15009699596618	1.37042206526335	1.10462768430654e-05	5.36113017088557e-05
HIST1H4J	0.111851585263158	0.502384491352657	2.16720622507362	0.000153084961666787	0.00051337500192206
TRMU	2.13818858947368	4.49886370531401	1.07317155540676	4.58016921707263e-09	1.04040817215416e-07
CNKSR1	5.16077088894737	12.5813955994928	1.28563347388658	1.76976891913396e-06	1.14071364581623e-05
NKX2-8	0.0963673294736842	0.764787203292271	2.98844235293093	0.000931880035995232	0.00245539462370152
AL031848.1	0.103407733157895	0.455139240869565	2.13796389792474	0.00169284919869866	0.00408999864990767
BTG2	418.830175789474	103.647507869565	-2.01467996071524	8.86477053226298e-09	1.66663015527906e-07
AL591848.2	0.166167818947368	0.811622276183575	2.28816745433597	0.0137446846546564	0.0247544171794316
HIC2	0.897992063157895	3.62693543019324	2.01397646247283	0.000566996177799448	0.00159402896075083
TMEM104	2.95383994736842	5.97730119323672	1.01690258491239	1.82955104741626e-08	2.8323322031907e-07
AL928654.2	1.57511572105263	3.28652764427536	1.0611062953367	0.00065547070532936	0.00180835124894792
CDX1	0.0591749457368421	0.659725695108696	3.4788079132121	0.00188008297859002	0.00446014897399633
PTGIS	54.2120637368421	6.36087230664251	-3.09131739818765	2.19962826284473e-08	3.26257905895302e-07
LCN12	0.111925233368421	0.496895827442029	2.15040810095015	0.000213981568100973	0.000687137570313352
Z97989.1	0.774313721052632	0.315135962898551	-1.29694380513654	3.59159532601828e-06	2.06083054651655e-05
CFD	225.198291578947	18.9615093111111	-3.57005017220675	7.37610437335304e-13	1.81509137102606e-09
CABP7	0.149823005631579	0.507806423	1.76101947345265	0.000680677448217232	0.00186991961360175
SGMS2	5.7947133	2.61114059487923	-1.15005714346793	0.000151770684067202	0.000509605108295081
BNIP3P24	0.0347431068421053	0.349643444782609	3.33108578194082	0.000470513683592559	0.00135423350901169
FCGR1A	0.364377187894737	1.34762238487923	1.88691175178673	0.00325476651764125	0.00714510169305052
BMP8A	0.157454645789474	0.436922162816425	1.47243996250061	8.97061135766876e-06	4.47886400377814e-05
AC145423.3	0.308633943684211	0.742144402801932	1.26580318784304	3.49198548076941e-05	0.0001433701690307
HSPG2	36.3315887368421	10.9381462584541	-1.73185619624947	0.0105201600336111	0.0196466370768035
DARS2	4.08429910526316	10.5107327101449	1.36370281602559	6.2752215541289e-09	1.30534348137606e-07
CASP14	1.36966009221053	38.5029281237464	4.8130783561555	1.0816859536672e-05	5.2634008165606e-05
POPDC2	26.6199790526316	2.07624725521739	-3.68045926991772	7.66431011096479e-06	3.93233389696561e-05
CCDC3	12.2333096842105	5.23545682198068	-1.22442744264684	1.09300734005416e-07	1.15343626104816e-06
NR2F1	11.6355719473684	3.71999474541063	-1.64516963966072	5.7369014219098e-09	1.2287840340102e-07
CRYAB	72.9753636842105	7.16830222652174	-3.34770612563617	1.69492887873292e-10	1.29814601488209e-08
ZNF883	1.40895467894737	3.03144618350242	1.10538100483185	0.0264937651707277	0.0436361056792805
C12orf75	2.35768404210526	8.29831548364734	1.81544811347514	0.00187432892446257	0.00444732697050453
AC113410.3	0.198681452631579	0.64512371115942	1.69911864327943	0.000133347668503481	0.000455712079569454
AC012603.1	0.86815112631579	0.353270105628019	-1.29717453564219	2.21123835966671e-06	1.37660703523438e-05
AC093162.2	1.92581676315789	4.03737764376812	1.06794809760293	0.00248562167881133	0.00566562722205749
BOP1	11.1273369473684	28.4590543333333	1.35477936266261	3.3083726201276e-10	1.86411397812175e-08
TINAGL1	24.0208656315789	87.4944350555556	1.8649031176588	1.61197349521389e-06	1.05750872825881e-05
LINC00174	0.909662347368421	1.8802071678744	1.04748858826222	0.000559177425174096	0.00157700977431859
AC023043.4	0.833783055789474	2.84170857608696	1.76901465140446	1.24905815441429e-07	1.27577997557296e-06
LARGE2	3.81501875826316	10.8973283502174	1.51421242333996	0.00850424791129174	0.0163757392815647
CCNE2	0.323155370526316	1.54202780398551	2.25452890531559	9.6862364704049e-09	1.76449373683696e-07
ZNF887P	0.06845911	0.282021169521739	2.04248901867784	5.92065654504914e-08	7.00531029104445e-07
AL137244.1	0.15257588	0.309203975289855	1.01903195607759	0.00608827707622475	0.0122450790847041
PKIB	0.694859171052632	2.56655992166667	1.88504342589833	0.00212659850343534	0.00494992776578058
LONRF3	1.28737945210526	0.602249339980676	-1.09600453475983	0.000431466765332328	0.0012574729602253
AP002387.1	2.32574797368421	5.17934546835749	1.15507502139353	4.4552446495592e-05	0.000176992918398643
SMYD2	4.65676373684211	10.7765835386473	1.21050028487932	2.36540783113455e-09	6.4791455672376e-08
MIR1291	0.102881642105263	0.316805253140097	1.62261068284026	0.00291079044523766	0.00649098658473903
BIN1	16.7545805263158	4.44880478309179	-1.91306586869521	1.62311001540379e-08	2.59186495481032e-07
ZNF497	0.226636895947368	0.568039832391304	1.3256093511081	8.71232878718952e-07	6.27040372205742e-06
SREBF1	10.5688408947368	26.197581794686	1.30961648564102	1.38725915709704e-06	9.31275261703462e-06
AL354836.1	4.57705698421053	9.32876995724638	1.02726661384736	0.00423509364844659	0.00895156721029665
AC093249.4	0.107230961052632	0.446558837584541	2.05812875536905	1.5830433223571e-06	1.04292984049811e-05
C1R	105.301874210526	52.4040175521739	-1.00678178905275	4.04305369749384e-05	0.000162719469167904
AP000697.1	0.0568633210526316	0.298420776908213	2.39177771771266	4.67484108388946e-05	0.000184396090810091
RNU4-52P	0.118503473684211	0.402515809178744	1.76411609815081	0.00109099853648497	0.00280301321923422
SHISAL1	8.34894640526316	0.527530506772947	-3.98426771673426	2.4483440847671e-09	6.61934871217364e-08
SYT16	0.0739792183684211	0.266944817478261	1.85134957771551	0.00959413342940977	0.018139613923404
HIPK3	19.5049699473684	8.05175721980676	-1.2764661982659	2.87888030363227e-08	4.01012851796973e-07
KRT9	0.0610571902631579	0.695036173992754	3.50885496050936	6.88131081907899e-05	0.000256994496214927
KIFC1	3.24366896315789	15.5325479915459	2.25959601577271	5.88056460184186e-10	2.69772698348066e-08
SPHK1	3.01055133684211	8.61676084637681	1.51711792429211	0.0164451656885318	0.028869820716123
C1orf53	1.39826941578947	4.39849842826087	1.65336873338797	4.50281081948952e-08	5.6740254805965e-07
COMTD1	6.72110019473684	15.60404302657	1.21515056553682	1.03977252009827e-05	5.09246979759954e-05
RND3	54.5326547368421	21.7461541891304	-1.32636010719924	2.61806882964368e-05	0.000112460680976658
ITPR1	9.765261	1.85207266111111	-2.39851790412443	1.14304350357562e-08	2.00438553809246e-07
TPI1P2	0.2275891	0.495862674444444	1.12350916821657	2.16173595178435e-05	9.5369774968029e-05
HSD17B1	0.436892684210526	2.43629358550725	2.47933714255799	9.55901476234492e-08	1.03256070227909e-06
MVK	2.90849208947368	6.08121379371981	1.06408793008907	8.22533047665688e-07	5.97490808104967e-06
AC012676.5	0.296810865684211	0.676851401714976	1.18929522707042	0.00245497872435759	0.00560783818723711
GTF2IP14	0.284931037894737	0.623930272342995	1.13077202415078	0.0004812167865665	0.00138143674515717
PILRB	0.398860481578947	1.53906974197343	1.9481025121252	1.48159376957278e-06	9.84388948246957e-06
AC027559.1	0.831159736842105	0.247087170724638	-1.7501056637868	1.41008829407103e-09	4.60931823373776e-08
PPAT	1.60687375263158	3.44904268429952	1.10193939812471	2.29673852031525e-08	3.37724959691811e-07
RGS17	0.290631294210526	0.613297066830918	1.07739599519212	0.0215822510579192	0.0365674351273016
RNF122	18.8079273157895	5.35226903019324	-1.81311832919758	6.50680527129856e-08	7.56895147584469e-07
MRPL12	19.3979796315789	40.8147240990338	1.07318330652697	4.50281081948952e-08	5.6740254805965e-07
AL645608.6	0.221137191052632	0.662972790169082	1.58400798092647	0.0153840951011065	0.0272673130910695
PRDX1P1	0.0980118557894737	0.305924249323672	1.64214629043167	0.00567773087286567	0.0115193841227918
PPIAP42	0.0832130673684211	0.218137580289855	1.39035633093848	0.00243928004504337	0.00558061012688033
AP002478.1	0.0591022847368421	0.394842588326087	2.73999180214357	8.55526456979429e-06	4.30585915029641e-05
SH3BGR	14.6159237894737	2.45896810772947	-2.57141608784621	6.71895690671301e-07	5.07110975223879e-06
LSM4	20.6702864736842	42.0980679710145	1.02619564093691	1.11813400867077e-08	1.96991309213076e-07
AP005432.2	1.21585161157895	15.9781140230918	3.71605805864058	0.00727724462386324	0.0143046147268866
ITGB3	1.97916800368421	0.49794748818599	-1.99082856840054	6.08763858669685e-05	0.000231032432171454
TCF3	9.02265073684211	19.914545589372	1.14219931481447	1.07416268665934e-09	3.85363565770348e-08
HIST2H2BD	0.128707451578947	0.396991441714976	1.62501232479886	0.000146157120178859	0.000493582801640736
PTGFR	4.55201186315789	0.489872900014493	-3.21602492909447	8.78576299609669e-10	3.34764524250993e-08
WLS	36.2799415789474	16.8875833077295	-1.10320924622526	2.91782588378656e-07	2.56067198585067e-06
CLSPN	0.449606511052632	1.91591416647343	2.09129809589868	7.37508487678525e-08	8.36630698567846e-07
AC118553.1	0.469743569473684	0.963035639710145	1.03571577775256	6.04029243130195e-06	3.20968583654824e-05
UBE2SP2	0.0997349578947368	0.257803663743961	1.37010159207541	0.000239830196566291	0.000758202860686322
HMGN2P19	1.29761955947368	0.166182541618357	-2.96502673887361	2.43047281316569e-06	1.48640682507913e-05
GPR89A	0.4069469	0.896170068357488	1.13893198362281	4.01111101489588e-10	2.07329134910445e-08
LINC02595	0.173133952105263	0.663702129975845	1.93864723476202	0.00116657701122714	0.00296391123380566
MMP13	1.12957875052632	16.6346707598575	3.88033655278152	0.000215555176738313	0.000691051304237689
RFC2	8.98830036842105	21.037131321256	1.22681774633775	4.31056680168292e-10	2.18592660043912e-08
PPP1R1A	2.18416701105263	0.295664903649758	-2.88504826899426	3.82824724822814e-07	3.21960569782629e-06
JPH4	0.765870823684211	0.353846135905797	-1.11397891439637	7.08139568861635e-06	3.6836329780762e-05
AC017083.1	0.124905503684211	0.552996608405797	2.14643358476006	3.18542484456254e-09	7.92682830991518e-08
ZNF697	0.903203747368421	2.14611408285024	1.24860339178668	6.09872457435076e-07	4.67444318580651e-06
FAM129A	64.6785541052632	6.1527360942029	-3.3939874093144	3.65725479580412e-06	2.09146820279405e-05
ABCA8	3.28225005263158	0.351831273164251	-3.22172952210221	3.26286549055489e-11	5.05959877680012e-09
ARHGEF39	0.486433926315789	1.8157235442029	1.90022880146994	2.30006483104957e-10	1.52495111042343e-08
CPEB3	1.19108294210526	0.580696919033816	-1.03641659527501	4.68739743691749e-07	3.79420354222963e-06
UBE2L4	0.104808131052632	0.276647930507246	1.4003004855762	0.00339912361485681	0.00741257047716856
AC008669.1	1.65769983157895	0.54072020057971	-1.61622863442255	6.04694939826327e-08	7.12681605273956e-07
CD300LB	0.553873393157895	0.251789307613527	-1.13733921688156	0.00157720338879358	0.00384344033445543
RPS6KA5	1.14594389473684	0.491314484299517	-1.22181773516172	4.04540904812791e-07	3.36453944902589e-06
THOP1	3.667673	7.69987285748792	1.06996960600731	4.73793234204701e-09	1.06210065153916e-07
LHX1-DT	0.00558675421052632	0.265506947301932	5.57059545085027	0.000230447044477852	0.000732116135377233
AC113346.1	0.0252242652631579	0.79962639968599	4.98644195150142	2.05479238608959e-05	9.12748453909624e-05
VSTM4	5.77625515789474	1.17462474282609	-2.29793453979588	5.61767224457532e-11	6.67116356487131e-09
CLN6	6.54534384210526	14.6495150507246	1.16231201988266	2.94080999883692e-09	7.48689525212715e-08
NUDT1	6.260414	14.495586794686	1.21128376562675	4.6847659597235e-09	1.05649355411409e-07
HAVCR1	0.0166263364210526	3.00274140216184	7.49666611551617	0.000870273560010603	0.00231452059624081
NDNF	4.40065205263158	0.576392747301932	-2.93259321890342	4.69641675513532e-08	5.8639658831794e-07
CENPO	1.04774400526316	3.1165044673913	1.57264251378232	1.9900904012788e-09	5.73580125947682e-08
SLC9A3P2	0.0166487289473684	0.315927424021739	4.24610923180645	0.00655309716707712	0.0130748364680846
ACTL6A	8.41306094736842	20.7009828913043	1.29899656825911	2.86171204764758e-10	1.71547294408983e-08
ST6GALNAC5	2.15377064736842	1.00234434550966	-1.10348640974538	0.000983983878847604	0.00257317373093397
AP000442.2	0.395888996842105	0.874324874396135	1.14307347370102	6.92717770522495e-06	3.61241343199377e-05
AL357033.3	1.28308672105263	0.46077950884058	-1.47747021660791	1.14109383140841e-07	1.19078662729232e-06
P2RY6	1.07248772631579	2.9188595102657	1.44444363567862	0.0042601994173302	0.00899247628162522
RNU6-45P	0.153468136842105	0.402586542149758	1.39135979261414	0.0137639074422192	0.0247866585409693
MPP7	8.81431031578947	4.3394117352657	-1.02234820939253	2.83449409157574e-06	1.69752992787219e-05
DYSF	8.89382478947368	3.25681161231884	-1.44934371292531	0.00274365258482134	0.00616960132418538
CTC-338M12.4	0.271421218421053	0.584184470797101	1.10589049973353	9.46073923562633e-08	1.0248952094576e-06
LINC00634	0.04102036	0.238987845628019	2.54252518965644	4.44221934988592e-08	5.6317136258047e-07
PLEKHJ1	7.53374763157895	15.8546017294686	1.073462025885	9.36986604373207e-09	1.73038185608804e-07
FGF7	7.991738	1.63952626772705	-2.28523027069207	1.79345124574158e-09	5.33291766203239e-08
HIST1H4PS1	0.0248550415789474	0.209013211183575	3.07198371238538	0.000655880824316279	0.00180921668724586
OLFM2	1.64959977894737	5.56847956207729	1.75516741813819	0.00499117952823787	0.0103126859914467
AC112484.4	0.138596018947368	0.344636442850242	1.31418944647506	0.0102533091579628	0.0192229056485667
MIR3685	2.62506143157895	5.38419141352657	1.03637851508479	0.000180368533757516	0.000591969933527944
DKC1	12.1421652631579	25.0215204661836	1.04314374496345	2.47661375548593e-09	6.65740743469663e-08
MEIS3P2	1.39242120578947	0.377043727608696	-1.88479193605014	4.86301418354743e-05	0.000190728961383571
AC010997.4	0.0398867605263158	0.301963389903382	2.92039178527163	2.19173032591889e-07	2.01289457196359e-06
BDKRB2	10.1892538421053	2.69283645118357	-1.91984989112482	5.41007553340034e-10	2.56985436033394e-08
ITPKA	0.308273845263158	1.22387862200483	1.98917608820695	0.0193412541696961	0.0332356398924817
PTGS2	62.5858714210526	14.7037062827536	-2.08965715654965	6.71895690671301e-07	5.07110975223879e-06
GEM	47.741256	6.37840505533816	-2.90396889926882	6.36845214085888e-11	7.24189500114759e-09
GRB14	0.173037104210526	0.627532336572464	1.85860837566598	0.0092346432000349	0.0175676573914992
U62317.1	0.574412570526316	3.95133755326087	2.78218187078428	3.42096813418633e-05	0.000140824100705876
CCDC134	1.39565994210526	3.25733574516908	1.2227449649139	2.1294232841189e-08	3.18869665442322e-07
CEND1	0.980181804210526	0.400797591956522	-1.29017552459341	5.2861058356733e-06	2.87575502945786e-05
HIST1H3B	0.0583124063157895	5.64290573502415	6.59649158113259	5.29477120976234e-09	1.15787636606959e-07
AC003101.2	0.0950037210526316	0.302497032801932	1.67086506470305	0.00402982052699226	0.00859612580126828
FCER2	1.96399967473684	0.762143074067633	-1.36566093110524	1.71257449140691e-06	1.11110080159986e-05
SGCA	15.0056809473684	1.47763425032609	-3.34414767152197	3.47168367206059e-10	1.93291396851255e-08
DNMT1	4.51502168421053	10.866758923913	1.26711689042404	4.22564040778447e-08	5.41939104383185e-07
FLRT2	0.596855214736842	0.274785473966184	-1.11907526394052	1.19283408050179e-06	8.15045369717957e-06
MAP3K14-AS1	0.378093581052632	0.816863103236715	1.11135096300669	0.000343535428226056	0.00103313916329628
AL161729.3	0.0561350763157895	0.245394327705314	2.12812746770226	3.8192890700274e-06	2.1781556480524e-05
AC080013.6	1.08916431052632	2.51552253280193	1.20763649824181	0.00026283868518215	0.000819073617351383
SGCD	3.85853062631579	0.510409823123188	-2.91832355693755	4.46303985645151e-07	3.64733789225999e-06
AL158196.1	0.118411420526316	0.308179720507246	1.37996369720562	0.000830745848660054	0.00222611887437998
PKMYT1	1.41739453926316	5.40896849589372	1.93211209870445	2.56334362041572e-09	6.79322264828533e-08
AL121832.3	0.0563372128947368	0.327255896173913	2.53825908763993	3.34852661209265e-10	1.88108996475133e-08
AC025857.2	2.0626681	5.27304546821256	1.35412473820177	5.01053655671599e-06	2.7473026713519e-05
MORN5	2.76572636947368	0.121266307801932	-4.51140775074392	4.00840346988128e-08	5.17972963535692e-07
MIR34AHG	0.193803103684211	0.400474335169082	1.04711811376494	0.00603429789723992	0.012149536586105
TRIT1	7.89426547368421	17.4733313043478	1.1462777443395	3.59374766398915e-07	3.05387171283643e-06
MAGEA4-AS1	0.0395760210526316	0.819693877128019	4.37238674425995	0.000608199240647324	0.0016941274275929
PDZRN3	12.4546214210526	1.87636394903382	-2.73066957659914	5.60703534233827e-10	2.6170349285645e-08
AC011472.1	2.94064456315789	1.0765569302657	-1.44970780182733	0.00017637186953431	0.000580064046989002
CCNA2	3.35787154736842	13.9132919115942	2.05084485736252	5.80165039459967e-09	1.2341991650099e-07
TMEM262	0.165883243157895	0.38180867968599	1.20268174146948	1.27443195394213e-06	8.64191064395236e-06
DUSP9	0.691322593157895	3.84470078787923	2.47544034512185	0.000255247825065753	0.000798005898247138
ABI3BP	9.21583831578947	1.06126995676329	-3.11832372277382	8.27845523730729e-11	8.17519240092614e-09
DACH1	1.31929242631579	0.468408308050725	-1.49392580909206	4.82708930239959e-07	3.88715727417126e-06
NDC80	1.74414764736842	7.54863701980676	2.11369400148298	4.27983151518642e-09	9.86516937585292e-08
CBWD4P	0.559227965789474	1.156284012343	1.04798738972774	0.0004629888061088	0.00133572618683223
PCDHGC3	4.32069761631579	2.14867808946618	-1.00781491021105	7.95863303267793e-05	0.000291655921078391
TSPAN11	2.98739075263158	0.975750787777778	-1.61430132788516	2.32165886727465e-08	3.40855127751755e-07
C9orf66	0.225913661052632	0.471927016908213	1.06279225185753	0.0184847055724055	0.031933537991911
LINC01311	0.367523640526316	0.99287734589372	1.43377845428026	6.78422151375341e-07	5.11009025542173e-06
AL356417.2	0.0541584515789474	0.238119962101449	2.13643017272286	0.0286552422100808	0.0467122771144871
AC005726.1	0.362774664210526	0.928990092004831	1.35658950673072	4.79021880427717e-05	0.000188267439096465
ATAD5	0.4544129	1.67818398140097	1.88482519273793	2.89656436572102e-10	1.7198809238615e-08
SLC22A11	0.00633143294736842	0.236411143934783	5.22262218123912	0.00743013576779092	0.0145797571021817
RNU6-1095P	0.239126326315789	0.590620335507246	1.30445805990288	0.00682563015161862	0.0135394120451232
LY6E	52.7693989473684	160.199949360628	1.60210023551945	0.000293135861930114	0.000898857358619828
AL513327.3	0.114062668421053	0.370873928719807	1.70110216532876	0.000101697258379409	0.000360981017588508
POLE2	0.739592578947368	2.64691203285024	1.83950759531704	1.09964334028741e-09	3.90030396858463e-08
CNIH2	0.312510647368421	1.6635612510628	2.41229773718729	2.91782588378656e-07	2.56067198585067e-06
AL513320.1	0.287389611578947	0.834803953454106	1.53842951991769	1.17045503484811e-06	8.03267283384576e-06
PRAC1	8.23032852105263	1.99085858070048	-2.04755927445495	2.89395667591187e-10	1.7198809238615e-08
MMP9	6.2122355068421	50.9576288780193	3.03611372008326	0.00315756993955985	0.00696514046272766
LRRC61	3.27066028947368	8.40206332705314	1.3611617393944	2.8605415146584e-06	1.71094486578054e-05
HBA2	16.7692457368421	8.11336427207729	-1.04744563066631	5.98697204832579e-06	3.18857668301836e-05
ST20	0.839055189473684	1.81072898888889	1.10973302160497	1.24610818083316e-05	5.93720868384271e-05
PIPOX	0.897021941578947	0.310778493519324	-1.5292566046996	1.34601901381712e-05	6.34556652167101e-05
AC036108.3	3.65505165894737	0.245654956181159	-3.89518654535021	6.03933858432453e-07	4.64257700605015e-06
AC017076.1	0.0627305563157895	0.286557844227053	2.19158612696561	8.56847875670148e-05	0.000311268861397851
CATSPERB	0.172206061315789	0.500073114541063	1.53800311977011	0.00135910497029686	0.00338208183552552
DHCR7	6.64510894736842	20.6332137584541	1.63460378997845	1.71397724217155e-08	2.69115941379622e-07
ADRA2A	3.93366922105263	1.24344648270531	-1.66153123165892	6.30571947256166e-08	7.3807994050951e-07
KCNN2	1.06753425315789	0.276965080048309	-1.94650636439501	0.000374334822798573	0.00111327433733035
LDLR	24.5649672105263	9.64511014927536	-1.34873269399656	0.00212659850343534	0.00494992776578058
FAM234B	1.79024808947368	3.62694005410628	1.01859337319099	0.00333447786305248	0.00729363582938374
LINC01481	0.432403365789474	1.18050532103865	1.448954886381	9.22703241012238e-07	6.58777812447208e-06
TENT5A	11.6552864736842	4.61367478429952	-1.33699624686263	1.4708687394442e-07	1.46330382599107e-06
HAP1	0.120834613473684	0.75161983239372	2.63696935588589	0.000848975408742178	0.00226558463863312
USP12	12.8474465263158	5.52501682850242	-1.21743088347551	1.49556363943755e-06	9.92265225133195e-06
GJB7	0.230999493684211	1.18004094278261	2.35287532171384	2.2542632057696e-06	1.39593203068828e-05
ENTPD6	8.31006510526316	18.0793261207729	1.12140921954743	1.48097016409665e-09	4.73721053523833e-08
HAPLN1	0.140752504789474	0.639394630855072	2.18354603322126	0.00530468046512053	0.0108730303219419
RHOQP2	0.555128116842105	0.277401464613527	-1.000845361655	7.82864148140378e-05	0.000287799463952907
HOXB-AS3	0.306264822947368	1.20289042494686	1.97365365280783	3.01160892178246e-05	0.000126574662285596
FAM19A3	0.02876965	0.287981192391304	3.32335501950169	6.8472156805176e-07	5.15340183768759e-06
AL021407.3	0.0968422731578947	0.442277381666667	2.19124261490636	0.000508988948054766	0.00145227488326514
AC103957.2	0.160702154210526	0.482600030652174	1.58643873873291	0.0097287175063109	0.018366025412105
AL024498.1	0.105231776842105	0.351344130338164	1.73931437558591	4.40846727755179e-08	5.59276647362136e-07
LIPK	0.0740418978947368	0.564329079613527	2.93012291191504	0.00043558485090913	0.00126789924877568
AC130324.1	0.0642197294736842	0.241342154541063	1.90999143614287	7.33039694809172e-06	3.78930234923726e-05
LIME1	0.606274092631579	1.87187050021739	1.62643855034421	2.32165886727465e-08	3.40855127751755e-07
GGCT	20.9118541578947	50.2716530966184	1.26542414562147	4.84848310335141e-08	6.00079739236032e-07
TNS2	16.970552	4.65962684299517	-1.8647471628504	2.4966581229183e-11	4.75155107568729e-09
UBE2Q1-AS1	0.0839899452631579	0.443862741714976	2.40182507931631	1.19253010229793e-07	1.2309941557688e-06
ZNF525	0.740232384210526	2.14078944550725	1.5320927501772	1.48960945253457e-09	4.73721053523833e-08
ZNF736P9Y	0.0180834568421053	0.789316172318841	5.44786091345206	0.00102920904660496	0.00267540168210707
GPR183	14.8466753157895	5.53558063768116	-1.42333334075619	2.43769308626728e-07	2.19263832107541e-06
MXD3	0.9920937	2.70294414710145	1.44598341074461	4.09333155807048e-08	5.26409732858646e-07
EN2	0.0185741235789474	0.381888792577295	4.36178653747363	8.84003541014188e-05	0.000319833367528909
CST4	0.00808169052631579	2.57370841891304	8.31497579419604	1.31648803376689e-07	1.33376160786005e-06
CLEC5A	0.161170654210526	0.79000076555314	2.29326496801349	1.60969963430375e-05	7.40993164111027e-05
AC087294.1	0.100598068421053	0.242747514275362	1.27085391829442	0.000678349194824527	0.00186379730343042
CD3EAP	1.07178669473684	2.72247949613527	1.34490337206689	5.01269528906542e-09	1.11173997291648e-07
SLC29A2	1.71828077368421	6.54113538140097	1.92857527643976	1.10430845090387e-07	1.15949297505928e-06
AC079062.1	0.187055358	0.500167514753623	1.41894606841473	0.0140424108889206	0.0252035350591943
PANO1	0.164624384736842	0.499630794130435	1.60168434982473	4.09333155807048e-08	5.26409732858646e-07
SMCO2	0.0865336789473684	0.39712918060628	2.19827472764218	8.38423761272737e-07	6.07654128107586e-06
NACAD	1.99473089473684	0.776730433671498	-1.36070822887332	1.45519878020358e-08	2.40775085652203e-07
MAD2L2	5.87893989473684	13.5010894710145	1.19944789709394	1.5476792008192e-07	1.52276375694655e-06
C7orf61	0.150103691578947	0.519739463768116	1.79182914851026	1.73933052755372e-07	1.67273494046594e-06
NLN	1.24285847368421	2.7099506005314	1.12460452933604	8.79614897625507e-07	6.32345376404114e-06
CNN1	670.652476842105	34.6367466528502	-4.2751900421174	5.68867175138126e-11	6.71299044472746e-09
ABCA12	0.358036846315789	1.11546691185749	1.63946774850559	0.000252483504202715	0.000791140278783491
POU5F1	1.07541194	4.68505848608696	2.12317766327232	0.00105170285761693	0.00271993118090509
ZNF468	2.05414333157895	4.83964782536232	1.2363652165161	1.26245481719751e-06	8.57619106990474e-06
ZEB2	3.32196783684211	1.03113999391304	-1.68779789008993	1.69541727581576e-08	2.67770322778881e-07
FAM124A	1.10741706315789	0.377710436528986	-1.55184610370248	5.64264135720861e-07	4.40953268576864e-06
ATAD2	2.88671078947368	9.00061311690821	1.64059670468782	7.42004961978334e-09	1.46704310870384e-07
SH3D19	14.0119588947368	5.72458053599034	-1.29141677110873	1.14340333683153e-05	5.51083401206524e-05
ADRA2B	1.01179897368421	0.42776596386715	-1.242029079863	0.0001004937883397	0.000357114573980642
CUZD1	0.188870668947368	0.423592164330918	1.16527722951938	0.00021083434258035	0.000679025827709238
CRISPLD2	30.7941830526316	8.01607213478261	-1.94169045883724	6.34587228885364e-09	1.31421193990906e-07
AC025766.1	0.0559290421052632	0.208547607536232	1.89870723502522	0.000275665247356742	0.000854079761584305
DMRT2	0.0537776915789474	0.60473067531401	3.49121302878583	0.00563404895935233	0.0114498972896603
AC136604.2	0.403202386315789	0.194192491280193	-1.05401675927217	6.09397080401829e-06	3.2336815850914e-05
SNHG14	1.47297429473684	0.664879299400966	-1.14756788765515	3.19158133758224e-06	1.8678615295401e-05
SNORD14E	1.13621235263158	9.21410393888889	3.01961137941213	1.66126368901746e-07	1.61051780278412e-06
NPM1P9	0.0756983136842105	0.24694305410628	1.70584532280452	9.22392832393908e-07	6.58777812447208e-06
AGAP1-IT1	0.0929414268421053	0.388596098357488	2.06387771735846	1.12813990114509e-05	5.45548684669725e-05
NCAPH	1.53068623263158	7.7289604763285	2.33609580610068	8.49032192211263e-10	3.31883146301248e-08
KRT33B	0.079792898368421	0.86848971544686	3.44417650854688	0.00558447436940484	0.0113682860576265
FAM155A	0.619483215789474	0.210751329304348	-1.55552346374479	0.000179028262189695	0.000588284988347679
AC004837.2	0.0873727021052632	0.20846842	1.25457433910542	0.003551711533792	0.00770680739083373
RADIL	0.517981213157895	0.225355529193237	-1.20069692562817	7.47137403317674e-07	5.54311549958463e-06
CCSAP	1.15584077368421	3.05506573695652	1.40226075462998	7.54444869310494e-10	3.1386133931078e-08
EEF1A1P11	4.56890763157895	1.95923174927536	-1.22156121822781	2.05354442078795e-06	1.28994489344641e-05
KHDC4	3.99422121052632	10.2583034975845	1.36080601961908	4.09034870576589e-09	9.54567322963749e-08
RBM24	3.39389275263158	0.514510510666667	-2.72166852168876	1.16723349390883e-11	3.59595885353336e-09
FOSL1	80.0768047894737	22.255331992029	-1.84723338692786	0.00242468272180513	0.00555215058692088
LINC01096	0.0458843073684211	0.264360823190821	2.52643565811249	0.000712404478771387	0.00194596669605292
IGSF9	1.94336622126316	9.38917192487923	2.2724401275514	8.06889715336899e-07	5.87492660766475e-06
AC098614.1	2.60336127894737	1.16186106978261	-1.16393796629441	2.41338815644837e-07	2.17703855670388e-06
AL591845.1	0.670174184210526	1.92257490871981	1.52043179193531	6.14829971039418e-06	3.2569324524598e-05
CD164L2	0.232008797368421	0.634336529214976	1.45106891344185	5.50488189565806e-05	0.000212003487291117
ABHD3	2.51905051578947	5.3192347384058	1.07833865119825	1.92439153614078e-06	1.22314899703962e-05
AC092155.2	0.848150663157895	0.341275626304348	-1.31338318222186	1.67700720020376e-07	1.62358770546236e-06
SNORD9	0.153613121052632	0.56902720531401	1.88919617885949	0.00422826743192696	0.00894419186304911
BAX	18.0403613157895	36.1526744806763	1.00287414449155	8.67023231888659e-09	1.63661538228641e-07
AL445933.1	0.284413046842105	0.938915905541063	1.72300830094931	0.000412059740423855	0.00121050209951038
DNAJB4	16.3774084736842	4.45128189057971	-1.87941431431875	5.67798679198148e-08	6.772795052635e-07
CRYM	4.59679812631579	1.06496461757005	-2.10982381084583	1.19351796632469e-09	4.10910191168088e-08
LMCD1	12.7914657894737	3.76496717657005	-1.76447240137667	8.06890468899007e-07	5.87492660766475e-06
TBX4	4.22715221263158	0.667169185871981	-2.66356149974674	0.000566937368958635	0.00159402896075083
AP001434.1	0.23393117	0.543724018550725	1.21679045396238	0.00445967518476535	0.00935564462117087
PCAT6	2.19920172631579	8.61298361231884	1.96953314185188	2.94126030812487e-08	4.08186887288069e-07
PROSER2	2.05069853684211	6.8759253968599	1.74543846793015	5.01053655671599e-06	2.7473026713519e-05
RDH16	0.201225324894737	0.935088607971014	2.21629119500722	0.000117205188817329	0.000407093846312392
SKA1	1.02608887105263	5.15614270724638	2.32913650363766	6.94434213220489e-10	2.97481030654247e-08
TRIM60P18	0.675572838421053	1.72075344864734	1.34885717083779	5.40214306914493e-05	0.00020834616733066
CLIP4	6.55147631578947	2.94377119166667	-1.15415450107327	5.05550256006126e-06	2.76872138162374e-05
FOXD2-AS1	0.547179216842105	1.9060252960628	1.80048192687498	8.89130673308991e-08	9.75599931186936e-07
JCAD	11.4264820526316	3.33542675555556	-1.77643803390941	0.000446970673540003	0.00129641532657769
AC090796.1	0.0885236157894737	0.247897143985507	1.48560736525551	0.0129613298123451	0.0235515621992089
PYGM	8.73221973684211	0.426232763934783	-4.3566350341341	1.13753815069592e-11	3.59595885353336e-09
LPAR1	10.3458672105263	3.91582819869565	-1.4016652044626	8.39075816251144e-10	3.30747469334458e-08
ELF3-AS1	0.806648014736842	2.39084165379227	1.56750739498864	4.71374788576234e-05	0.000185690998107553
AC253576.2	0.315645302105263	0.78250808705314	1.30980138310149	0.00276039958498086	0.00620094277435821
THUMPD3-AS1	1.43887552631579	2.95229435217391	1.03689477600819	8.97061819868798e-06	4.47886400377814e-05
RASL10A	0.266509915263158	1.06440582658213	1.99778719956552	0.00042842686097246	0.00124977817046428
CDC7	1.36990456315789	4.5425511442029	1.72942736896723	1.04653467390286e-08	1.87010762727994e-07
ZNF432	1.49484258421053	5.22274665193237	1.8048151542294	2.17989881986545e-05	9.60127736082992e-05
CCDC58	5.32434194736842	12.0110676666667	1.17368926412397	2.53496107906024e-10	1.61232117716635e-08
OR7E126P	0.0774944084210526	0.354117556256039	2.19206424853192	1.95363148565936e-07	1.83394405948813e-06
CD1E	0.82956327	0.396693627809179	-1.06432679506196	0.00685761595819299	0.0135928003616707
KLHL15	2.96003742105263	1.42101684178744	-1.05869176124884	1.30070548644783e-05	6.15980238319552e-05
SLC12A9-AS1	0.745617643684211	1.67520382285024	1.16782873538484	0.000232058249545463	0.000735992591539853
CKAP2L	0.695870937894737	3.75425016376812	2.43163312550843	9.00568088997766e-10	3.3930439867199e-08
LAGE3P1	0.0885635115789474	0.344912848574879	1.96144754077322	1.74830429619927e-06	1.12959481782324e-05
AL138962.1	0.100901263157895	0.283372152149758	1.48975375185801	1.13958838561019e-05	5.50517427373944e-05
SHCBP1	1.31410252421053	4.24082221714976	1.69026616699878	1.3012658002116e-07	1.3219085116064e-06
HSPC324	0.608337847368421	0.232808697584541	-1.38572780597469	1.2000029339731e-05	5.75847955246478e-05
AC009237.15	0.446086994736842	1.00869346043478	1.17709081606011	0.0263619119960464	0.0434607483297988
UHMK1	7.92659884210526	16.8110394033816	1.0846350572939	3.88908827538272e-07	3.25908724033077e-06
GJB6	19.3494383052632	50.1385060510145	1.37362732264487	0.00071162232695956	0.00194413095807054
DUSP1	795.229284210526	103.542613268116	-2.94114624958818	2.14111464924399e-11	4.46374824041833e-09
SNRPB	97.4091084210526	231.534988719807	1.24910163912401	1.08683020749356e-09	3.86948675203068e-08
OAZ3	0.233148726315789	0.488344676497585	1.06664922150911	7.27083635228475e-06	3.76234700711304e-05
ST6GALNAC4P1	0.168451093157895	0.449160355144928	1.41490080397865	3.81918513458044e-05	0.000155190942877092
AL390728.6	3.73549885263158	8.17650555676328	1.13018348264481	3.6079048005605e-05	0.000147612555108846
PTGS1	108.338497789474	6.78574990292271	-3.99689392282729	8.38618492366459e-09	1.60071198090253e-07
ADAMTS7	1.09900391052632	3.0530550005314	1.47405706004953	3.72746933818292e-05	0.000151908138992889
SYNPO2	129.094954894737	4.88644699584541	-4.72350296760356	5.47826399194018e-11	6.58901713338292e-09
ZNF114	0.0806428715789474	1.43277163105556	4.15111785497696	1.02751474679101e-07	1.09978660547859e-06
CYGB	25.8412244736842	7.28572484371981	-1.82653001735568	2.182867259158e-07	2.00573645365238e-06
AC040160.1	0.129406542105263	0.288557071304348	1.15694613160246	0.00699702623306013	0.0138122254824731
NAPSB	8.35771138947368	3.64451621082126	-1.19738062247352	0.00284656228963766	0.00636591754951984
SSC4D	0.176804926315789	0.744789177391304	2.07467363599558	9.26665894925028e-09	1.72148833529488e-07
FAHD2P1	0.0764351736842105	1.79065806789855	4.55010938031961	0.000394054946918267	0.00116325565906662
TMSB15A	0.745466662631579	4.5565313115942	2.61172023989296	0.000761801640317662	0.00206349258116302
REEP2	3.87416018947368	1.37419741004831	-1.49529433888386	1.52388427455961e-06	1.00784774915622e-05
ALG3	8.98719115789474	22.7317043091787	1.33876366051141	5.08003550824378e-11	6.31236465173365e-09
LRRIQ4	0.083398837368421	0.395302853995169	2.24485919426156	0.000389523790035901	0.00115314529385352
ATP13A2	6.95375426315789	15.1387800676329	1.12238496285792	9.36986604373207e-09	1.73038185608804e-07
AC073107.2	0.0496001994736842	0.317416874130435	2.6779609972906	5.24526590010827e-06	2.86012566357836e-05
TRABD2B	1.30624317894737	0.559420542929952	-1.22341836536458	2.03432060921452e-07	1.89711518840418e-06
AC020922.3	0.0790129442105263	0.284670871352657	1.84913395265424	3.94346079248558e-05	0.000159455604341294
MOGS	14.6108122105263	34.5031027777778	1.23968972634188	3.00362686957389e-10	1.76057499303267e-08
GPBAR1	2.16667712631579	0.521031174396135	-2.05604258236558	4.41960988811777e-07	3.61487098216015e-06
C2orf15	0.792923448421053	2.12167671475845	1.41995135092687	3.2439718300104e-05	0.000134720326353442
XPOT	7.24855168421053	14.9437135917874	1.04377404243544	5.00438005665266e-08	6.14912789803365e-07
PLCD4	3.53377636842105	0.578587007342995	-2.61060491141909	2.39274450388714e-09	6.52544551256314e-08
AC008083.1	0.0358987910526316	0.608745335386473	4.08383164735401	3.62998726073782e-07	3.08187560964813e-06
PPP1R14A	44.8852797368421	6.28397561497585	-2.83649289896894	8.20186843446834e-09	1.57837597370184e-07
PAFAH1B3	16.4294744736842	53.5633447971015	1.70495971965562	8.02149307483417e-09	1.55322264771015e-07
EDNRA	9.71346868421053	2.79265835567633	-1.79834748471801	9.40501533555814e-07	6.67674244196282e-06
DSEL	0.781529168421053	0.366734301497585	-1.09156450791802	2.56258791128287e-06	1.55353269723426e-05
PTGER4P2	0.135582089473684	0.303942083623188	1.16462983366883	0.00890397855575344	0.0170353165740391
MIDN	66.8467926842105	30.4459593115942	-1.13460757027071	0.00015998833067931	0.000533569329636668
ITGA7	20.2385136315789	3.45343336932367	-2.5510000450766	2.72849392643783e-08	3.83481135144217e-07
CDC42EP2	16.8576028421053	8.08825283985507	-1.05949939715415	4.87454547251991e-07	3.91361132652508e-06
EFHC2	0.582767963157895	0.259187754495169	-1.16892401076192	1.13833801633614e-07	1.1891527934599e-06
AC009754.1	0.0989441968421053	0.345727371521739	1.80494782785556	0.0262124451140404	0.0432486904392139
DPF1	0.0770906594736842	0.333384125850242	2.11255743699996	7.24355728271101e-05	0.000268917422428783
AC073957.3	0.328444842631579	0.85116245352657	1.37378340011861	0.000566996177799448	0.00159402896075083
SLIT3	18.5857716842105	2.4068158671256	-2.94900091226537	9.73087597194625e-12	3.38111899743755e-09
CRY2	11.5348877894737	4.15743251714976	-1.47223921846403	4.14070413932356e-12	2.64326191826201e-09
AC098484.2	0.183344793684211	0.394909724396135	1.10696359425234	3.75780379703077e-05	0.000152950724587525
CDC45	1.64960071473684	8.18371179299517	2.31063847546256	5.34593519118359e-10	2.55230997435567e-08
NR4A3	22.9382957368421	1.83048067969324	-3.6474637548602	5.46578880101085e-12	2.6988051387728e-09
TMEM106C	10.0804776315789	22.292194968599	1.14497467846035	2.20492575103715e-07	2.02105627096776e-06
AC110285.7	0.104445685789474	0.976235321425121	3.22447604921031	5.64102136582927e-09	1.21518351190648e-07
LDLRAD4	1.60875177368421	0.740206640628019	-1.11994175536727	1.9065906268923e-06	1.21471510806045e-05
HOXC9	0.169655289473684	2.15442577781159	3.66662508109576	7.12799224018405e-05	0.000265033053994931
LINC01978	0.0531763420526316	0.220838993432367	2.05413848638833	0.00323964824796123	0.00711690903600241
LINC02542	0.576531391578947	1.42832810202899	1.30885635121881	0.0133996832007241	0.0242237456301365
AL357054.4	0.662685242105263	0.287326360577295	-1.20563343308657	5.42936197671698e-06	2.93917864755952e-05
AC145343.1	0.201587229473684	0.825121572512077	2.03320245295418	1.05440262729597e-06	7.32755183681034e-06
IDH1-AS1	0.365280582631579	0.782333007391304	1.09877776914849	0.000751515697044992	0.00203797001227621
CSPG5	0.138633198421053	0.430068254033816	1.63329286078417	0.00242468272180513	0.00555215058692088
TRIM59	0.585352378947368	1.55685749398551	1.41125960834401	2.23322355472013e-09	6.24470544816897e-08
MZT1	6.28409084210526	12.7285964396135	1.01829740318292	4.00736679810893e-08	5.17972963535692e-07
AC093627.4	0.804431573684211	0.338684905751208	-1.24802601673738	5.98142398795925e-07	4.60527412370071e-06
AC097534.2	1.16813752105263	0.578682250265701	-1.01336682945875	0.000926514939943812	0.00244174495547418
AC022413.1	0.376200705263158	0.777701066207729	1.04771316320009	3.63744981491998e-05	0.000148594537072379
AC005841.1	0.102752672631579	0.334521693768116	1.70292385345208	0.00139675961624816	0.00346200801580769
STMN1P1	0.129241935263158	0.305064951570048	1.23904218175403	0.000577566840662753	0.00162034788148254
AC007182.2	0.39285722	0.788304103695652	1.00474721007233	0.00111629990974114	0.00285669845589868
FAM57B	0.0143684698421053	0.226597995236715	3.97915676085345	1.77885314508791e-05	8.08304866904809e-05
CCDC150	0.0743366959473684	0.392337633429952	2.39994925576057	2.16419820878568e-10	1.49471438314093e-08
AC007038.2	0.775990047368421	1.58424592753623	1.02968625290346	2.33046999476451e-05	0.000101784470465006
CHKB-DT	0.52394992631579	1.61741327028986	1.62618750772914	1.20769607055325e-08	2.080808206776e-07
SLC16A10	0.137308909736842	0.463695519178744	1.75575254310897	0.00125666664918605	0.00316197349318464
PLP1	2.69379459473684	0.154726457828502	-4.12184802750687	7.56584876965748e-13	1.81509137102606e-09
CIT	0.725971026315789	2.46674190193237	1.76462289651359	1.99547967137517e-08	3.03413169157312e-07
SPDYE6	0.125199337368421	0.335778311642512	1.42328212107193	8.66310080087066e-06	4.35080989738719e-05
KLF4	59.1993305263158	12.2398197214976	-2.27399855184538	5.08003550824378e-11	6.31236465173365e-09
ADAMTS8	3.81378884210526	0.549653129012077	-2.79463160251753	1.04820496072898e-10	9.64091650890091e-09
GOLM1	12.2065908947368	25.2723680120773	1.04990051566938	5.02665380624547e-05	0.000196203672491333
AL136164.4	0.576590789473684	0.281018781210145	-1.03688123854367	1.41339713889346e-06	9.46591093213935e-06
SH3BGRL	89.9767163157895	37.944126352657	-1.24567513931578	6.71895690671301e-07	5.07110975223879e-06
HPD	1.52442314736842	0.521659354219807	-1.5470834864491	1.98791916577998e-05	8.87023241558377e-05
AC010595.1	0.0185491284210526	0.236719645217391	3.67375613463281	4.42159871703286e-05	0.000175916998998489
HIST1H2BF	0.109700576315789	2.97881134574879	4.76309374751325	9.33937800716988e-09	1.73038185608804e-07
AC015912.3	2.23190522684211	5.8770535821256	1.39681728423038	3.13919898405676e-05	0.000130919738914997
FYCO1	18.6030491052632	5.70358166183575	-1.70559902947305	7.54366522758952e-07	5.57690270548708e-06
C3orf18	3.29732935263158	1.29908321135266	-1.34380415331708	0.000130426781313367	0.000446406001054853
PTPRN2	3.66614472631579	1.13070322038647	-1.697043429635	2.58856486981822e-07	2.31282107868568e-06
SNORD60	1.23927907894737	3.59483536280193	1.5364245880701	7.11870728537093e-07	5.32439560345553e-06
MSTO1	1.60168122105263	3.20581728140097	1.00110516003734	3.44984368097537e-09	8.40641779040791e-08
BBIP1P1	0.0632178410526316	0.269579990458937	2.09230974479995	0.000528705666811184	0.00150040392673187
ERFE	0.144377697894737	0.435972952125604	1.59439072709566	0.000416466102584147	0.0012203894241428
AL391280.1	0.127254182105263	0.290946752004831	1.193042070518	0.000916710021037876	0.00242120356485553
AL031058.1	1.19338047842105	3.09931672572464	1.37689611223491	0.00824963542421396	0.0159542269083206
CASP5	0.0455795352105263	0.244493125770531	2.42333578441931	0.0199737147495533	0.0341691110362754
ZP3	1.08692052631579	2.91757006570048	1.42452084585495	1.60970427805604e-05	7.40993164111027e-05
AC040169.3	0.141479337368421	0.470903968743961	1.73484151444475	2.43708317440546e-08	3.54472803111393e-07
C1orf220	0.191171280526316	0.422897076294686	1.14544078136914	0.0028816306125222	0.00643363036254978
RNA5SP18	0.132608663157895	1.13017894391304	3.09130428295175	0.000161529561833374	0.000538135505802485
CEP85L	1.78507225789474	0.627855824178744	-1.50747726101403	1.79346109083965e-09	5.33291766203239e-08
NARF-IT1	0.225834672105263	0.525250923115942	1.21773979418241	0.00139937223289558	0.00346802551919426
AC011468.4	0.0881551842105263	0.24678012763285	1.48510890498051	0.0170052322305775	0.0297029577678575
AC019155.3	0.168746118947368	0.679695556449275	2.0100343696563	0.00228679129507766	0.00527482592438028
POU4F1	0.0197616056315789	0.268055439103865	3.76175933322247	0.00197219309218173	0.00464585800233594
GHR	1.84649964210526	0.416039702166667	-2.1499998682205	6.31542911700969e-10	2.80133325112182e-08
TPM1	144.529402842105	16.7547995241546	-3.10871669276146	3.70187071923263e-07	3.13156899481343e-06
RF02246	0.474524831578947	4.10334113357488	3.11224360884353	0.00170279578435416	0.00411202638649392
SEPT4-AS1	0.05500265	0.207761692681159	1.91735663939173	2.47459187371295e-07	2.22369575318372e-06
AL138789.1	0.0477686115789474	0.477298020572464	3.3207555035228	0.00883209039108466	0.0169236917571318
BLM	0.568764838421053	2.20823518188406	1.95698964642272	2.47412963162632e-10	1.59526097175961e-08
ZNF296	2.52048618105263	5.26792105772947	1.06353168171901	0.000416466102584147	0.0012203894241428
LIN28B	0.0310681791578947	0.242020095413043	2.96161724667101	0.00859585082234849	0.0165284964706434
TREM2	1.88812073684211	8.00656413772947	2.08423224921948	8.87717742792526e-05	0.000320867809825008
TRIM63	2.77907607473684	0.36120570944686	-2.94371272530738	0.000474145022145304	0.00136322142974446
MIF	26.5982502631579	62.3410003019324	1.22884996139963	2.27240125415933e-07	2.07479633731346e-06
OPLAH	2.46549697894737	6.0064508294686	1.28463427905113	7.71316968271779e-05	0.000284270679153082
HIST2H2AB	0.0437356810526316	1.60686022405797	5.19928986886677	4.34509299009354e-06	2.43582252085823e-05
MSRB3	40.9358701052632	4.40717690193237	-3.21543884864661	5.27506660155761e-08	6.43119393404974e-07
RF02247	0.148081263157895	1.07124261246377	2.85482424329841	0.00264426156210548	0.00597834434146103
AL441992.1	1.94635397894737	4.31631965507246	1.14902759728369	1.555954275524e-05	7.19782299597062e-05
MIR4728	0.279895542105263	1.8790856115942	2.74707038337918	0.00063793730910739	0.00176751590826668
HASPIN	0.381199112	1.59366627676328	2.06373288837853	1.93161206151022e-08	2.9537764555922e-07
GNRH2	0.140511251052632	0.332827240603865	1.24408786232474	0.0165249987320107	0.0289962620112025
AGRN	16.0839458947368	49.9760138091787	1.63561444552164	6.48950231995892e-09	1.33542737509449e-07
PPIL1	11.2810445263158	22.7226378405797	1.0102296702017	2.47661375548593e-09	6.65740743469663e-08
Z93930.3	0.19443604	0.392752821956522	1.01432598466825	0.00110529240742284	0.00283352936746478
ZNF106	9.03773773684211	3.94064761763285	-1.19752894660296	0.000232059487904374	0.000735992591539853
RPS6KA2	9.26744978947368	3.26379421352657	-1.50562229724751	7.19560123608483e-10	3.05454900435882e-08
ARMCX1	12.6914973157895	4.34066762463768	-1.54787342400179	2.72114531038556e-07	2.41175481619104e-06
PFDN2	56.6274947368421	137.339343792271	1.27817036562169	8.20186843446834e-09	1.57837597370184e-07
FOXD4	0.152086425789474	0.315975152272947	1.05491971831563	0.00695761421039521	0.0137534667321565
SLC16A13	1.63499986315789	4.29788317270531	1.39433575223578	7.61663001172684e-07	5.62198382808933e-06
HIST1H2AE	0.748425689473684	10.0100536819807	3.74144682138679	2.90738736474695e-09	7.44220765203398e-08
CFAP45	0.666169324736842	1.83051132480676	1.45828587065749	0.00321556537981676	0.00707062618323003
ECM1	32.4574317368421	13.3927818231884	-1.27709319320757	0.00888710335699118	0.0170047644592316
FGF8	0.0246074620526316	0.78269485581401	4.99128218803449	0.0127493430307065	0.0232180843720417
AC016876.3	0.142280453684211	0.445303986111111	1.64605304624819	3.63936453832443e-06	2.08250676525103e-05
TERT	0.0568990128947368	0.62804404113285	3.46439020115675	6.55944376762233e-09	1.3442374713018e-07
CCT2	27.9288768421053	63.0035642391304	1.17367589019845	6.77616464256516e-06	3.54055074320385e-05
CNPY2	5.84330863157895	12.6211912077295	1.1109906839552	2.67049857824922e-08	3.76175411589265e-07
HYI-AS1	0.398510159473684	0.937055950362319	1.23351868762552	2.61806882964368e-05	0.000112460680976658
SNORA2A	0.313764542105263	0.771177870797101	1.29738132807662	0.0208504289833638	0.0354523424571686
AP006287.2	0.0878307784210526	0.258730551908213	1.55865192796394	0.000926569529551573	0.00244174495547418
C1orf35	3.27077068421053	7.39325106280193	1.17657829104064	8.79597668047432e-10	3.34764524250993e-08
KIF26B	0.246914716315789	1.77902282577295	2.84900029129799	2.39800483473679e-08	3.49330471383279e-07
CENPX	15.8918528947368	40.6724603236715	1.35576491963119	9.55150195046673e-10	3.52092006083708e-08
[truncated: 2,877 more rows]
